# Supplementary material for: Cyanovinylation of Aldehydes: Organocatalytic Multicomponent Synthesis of Conjugated Cyanomethyl Vinyl Ethers
Source: MDPI journal article supplement (doi:10.3390/molecules26144120), 2021-07-06

# Supplementary material

## Cyanovinylation of aldehydes. Organocatalytic multicomponent synthesis of conjugated cyanomethyl vinyl ethers.

Samuel Delgado-Hernández,<sup>1,2</sup> Fernando García-Tellado<sup>1,\*</sup> and David Tejedor<sup>1,\*</sup>

<sup>1</sup> *Instituto de Productos Naturales y Agrobiología, Consejo Superior de Investigaciones Científicas, Astrofísico Francisco Sánchez 3, 38206 La Laguna, Tenerife, Spain.*

<sup>2</sup> *Doctoral and Postgraduate School, Universidad de La Laguna, Apartado Postal 456, 38200 La Laguna, Tenerife, Spain.*

\* Correspondence: [dtejedor@ipna.csic.es](mailto:dtejedor@ipna.csic.es); [fgarcia@ipna.csic.es](mailto:fgarcia@ipna.csic.es)

| <b><u>Table of contents</u></b>                                                             | <b><u>Pages</u></b> |
|---------------------------------------------------------------------------------------------|---------------------|
| 1. <sup>1</sup> H NMR and <sup>13</sup> C NMR spectra of 3-(cyanomethoxy)acrylates <b>7</b> | S2-46               |

1. NMR spectra.

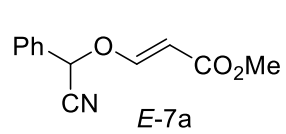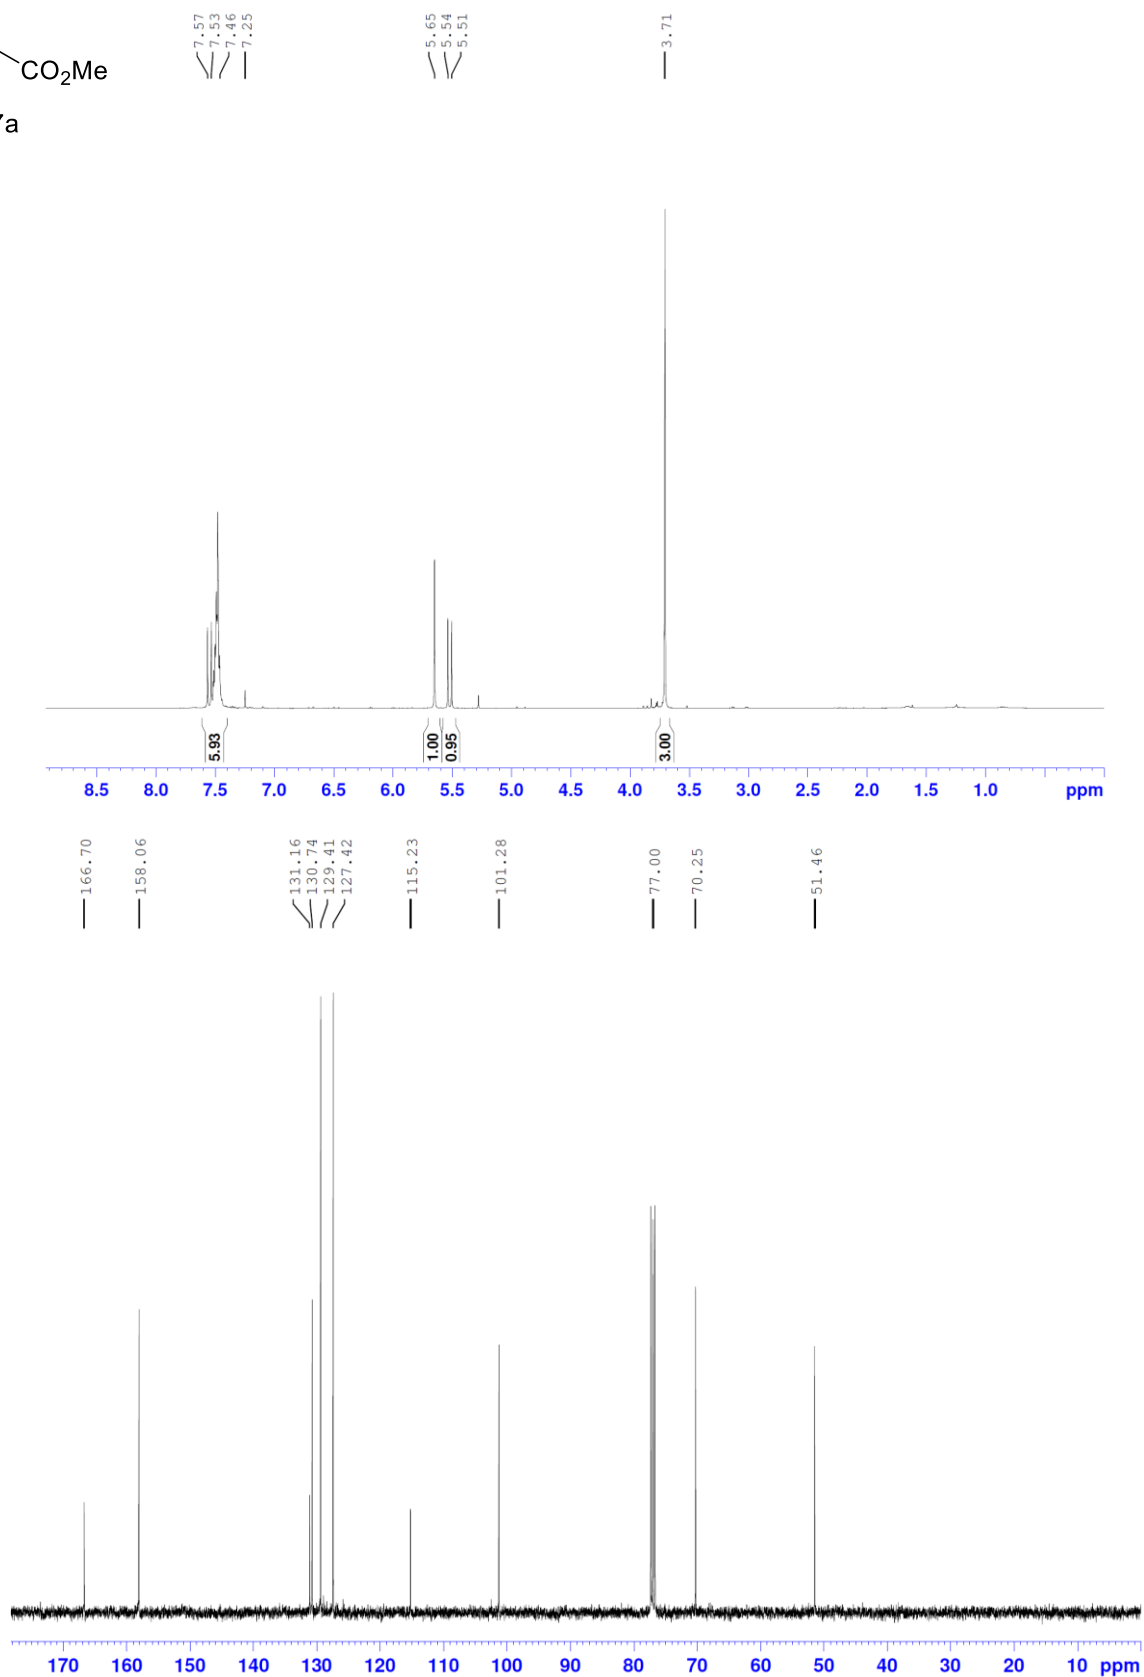

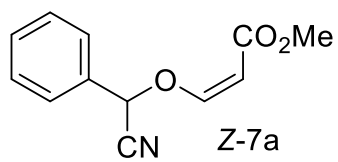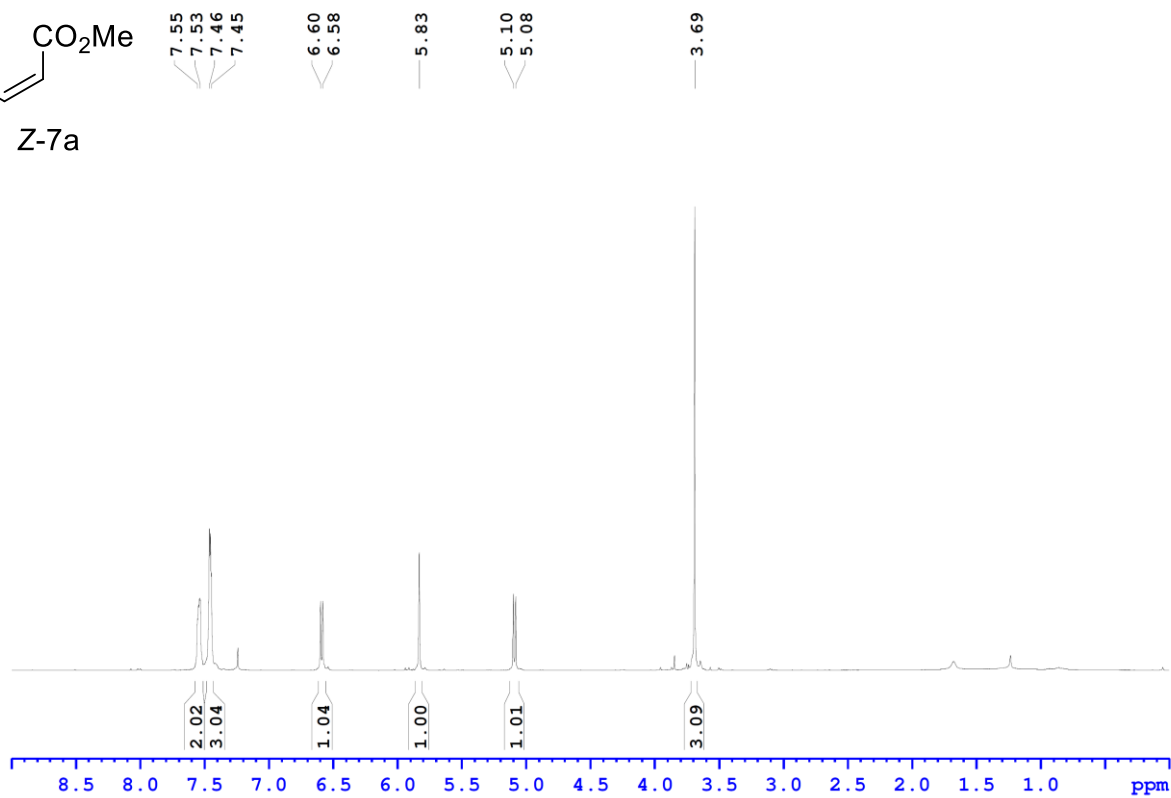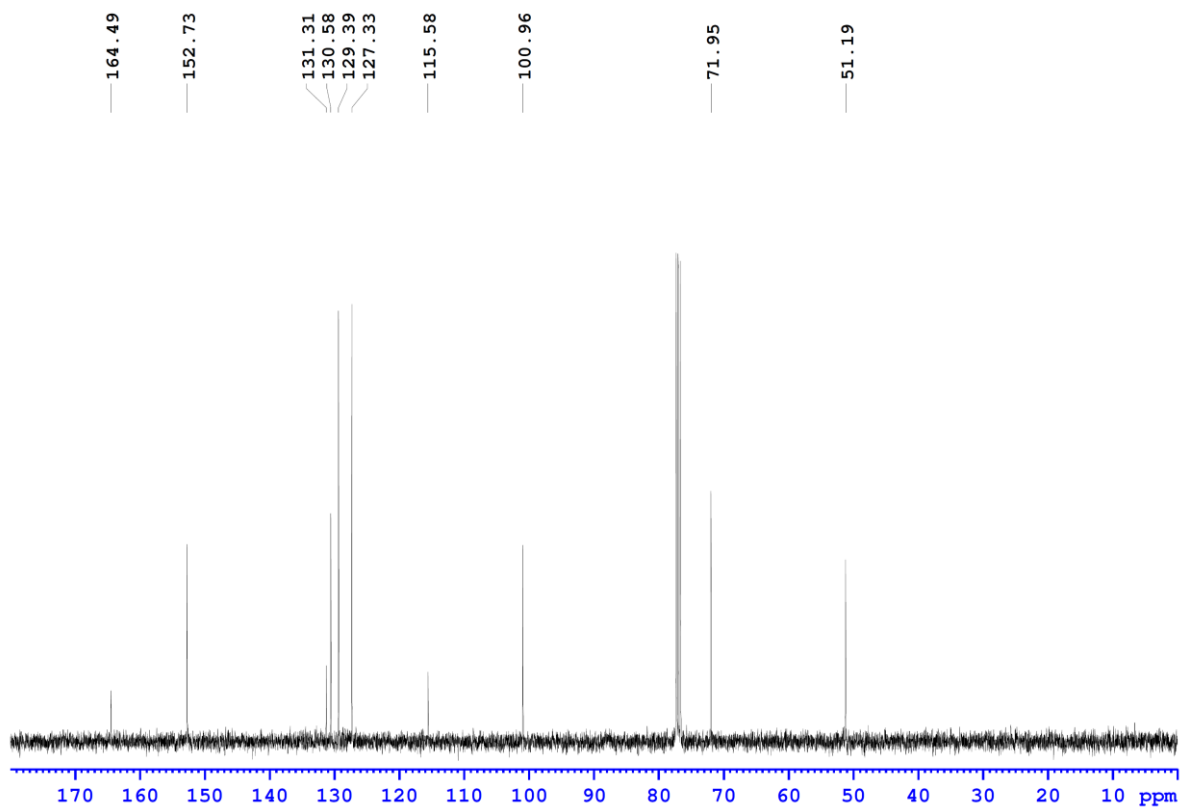

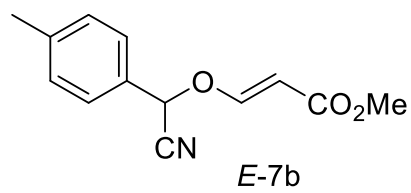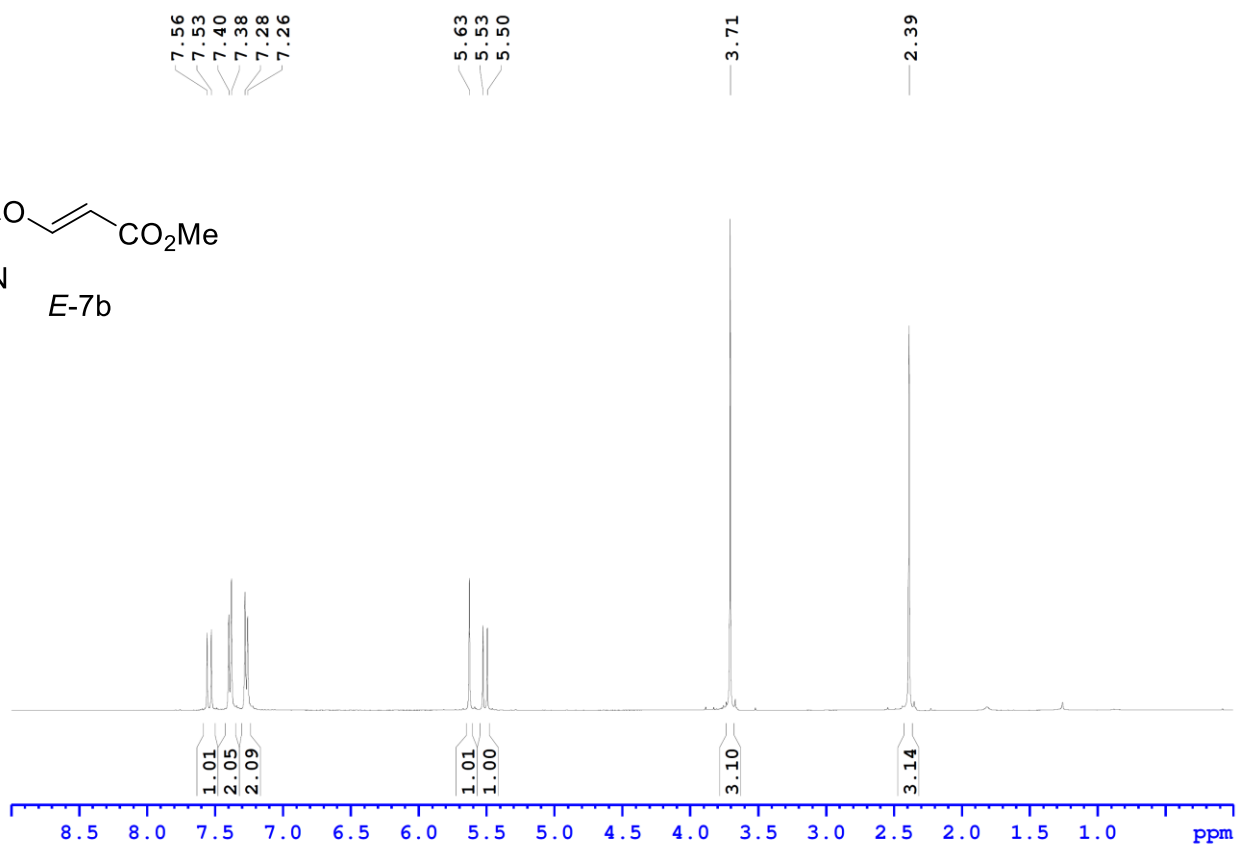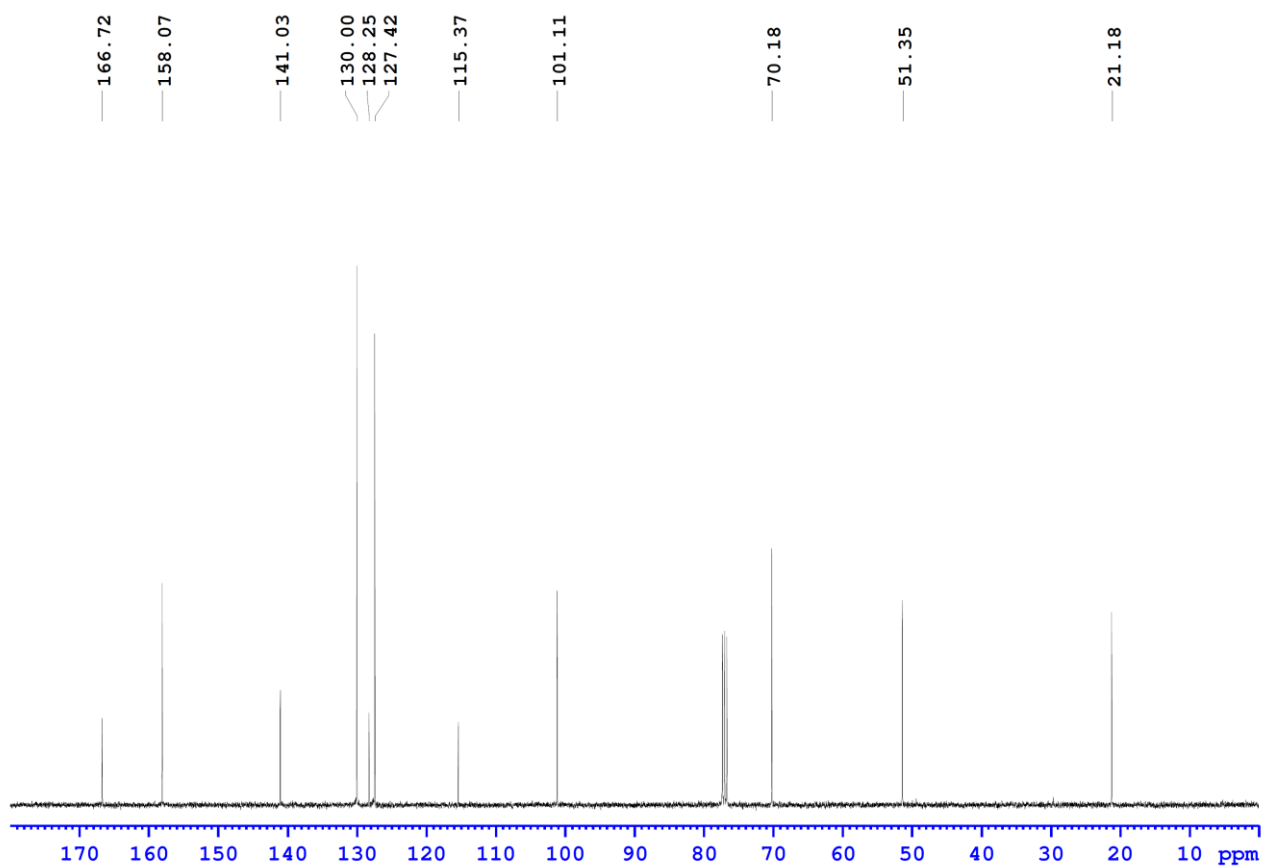

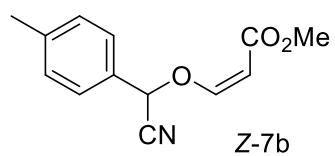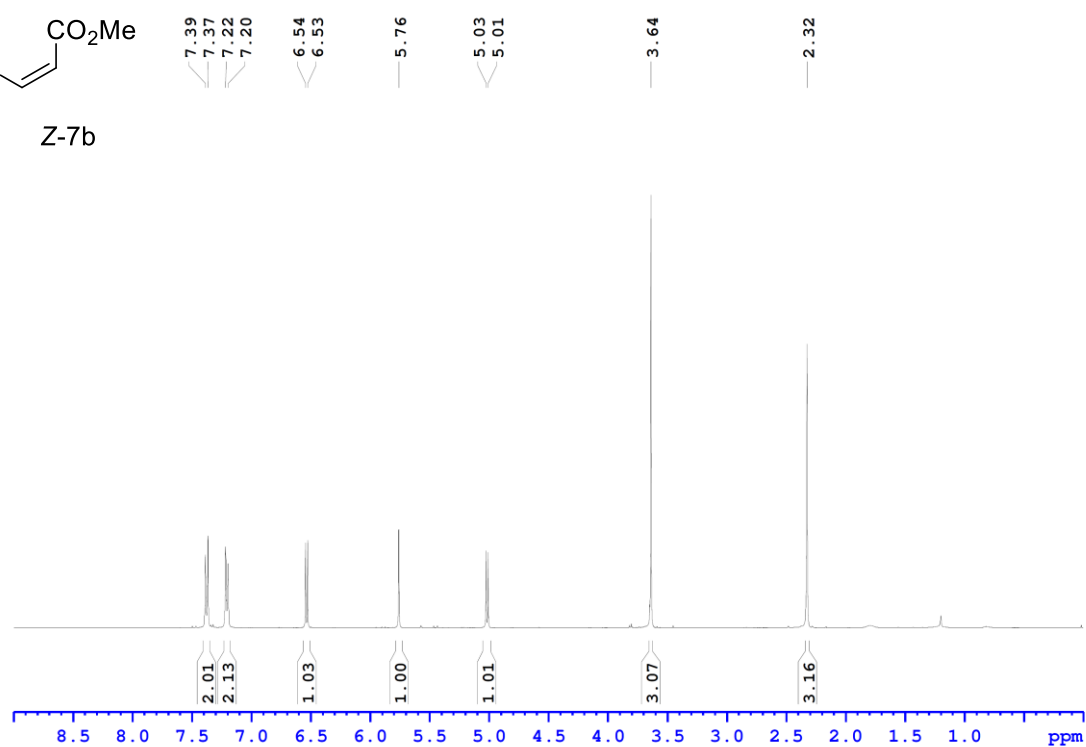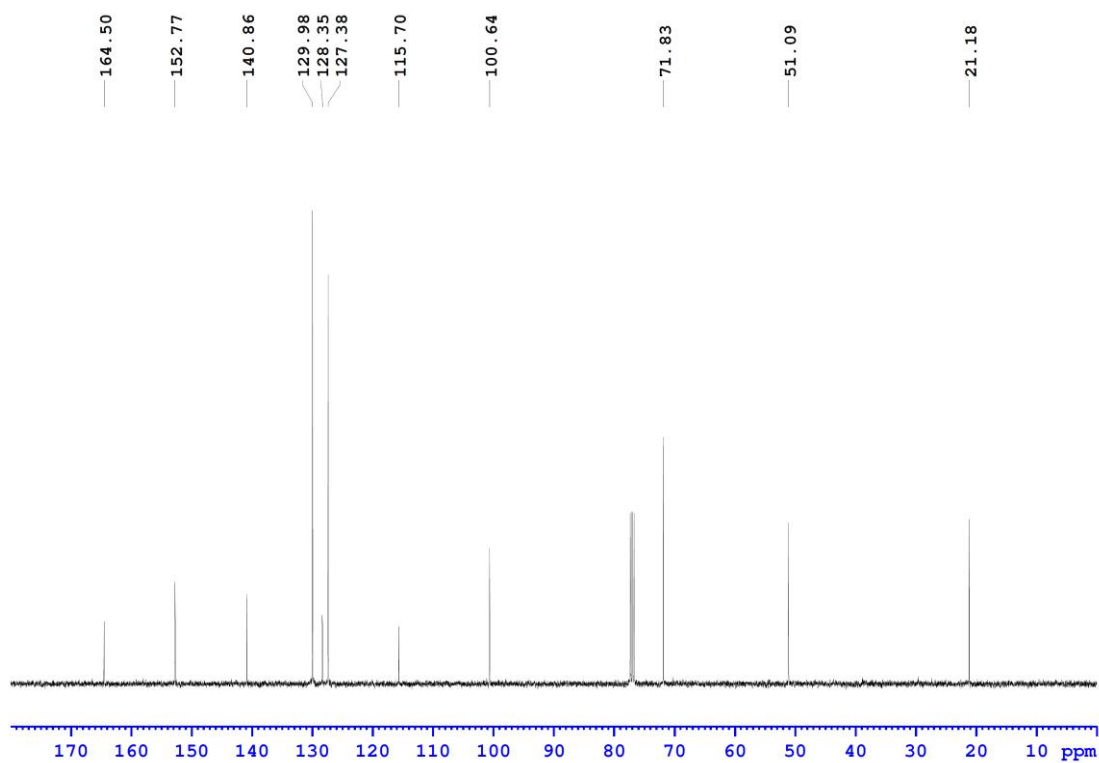

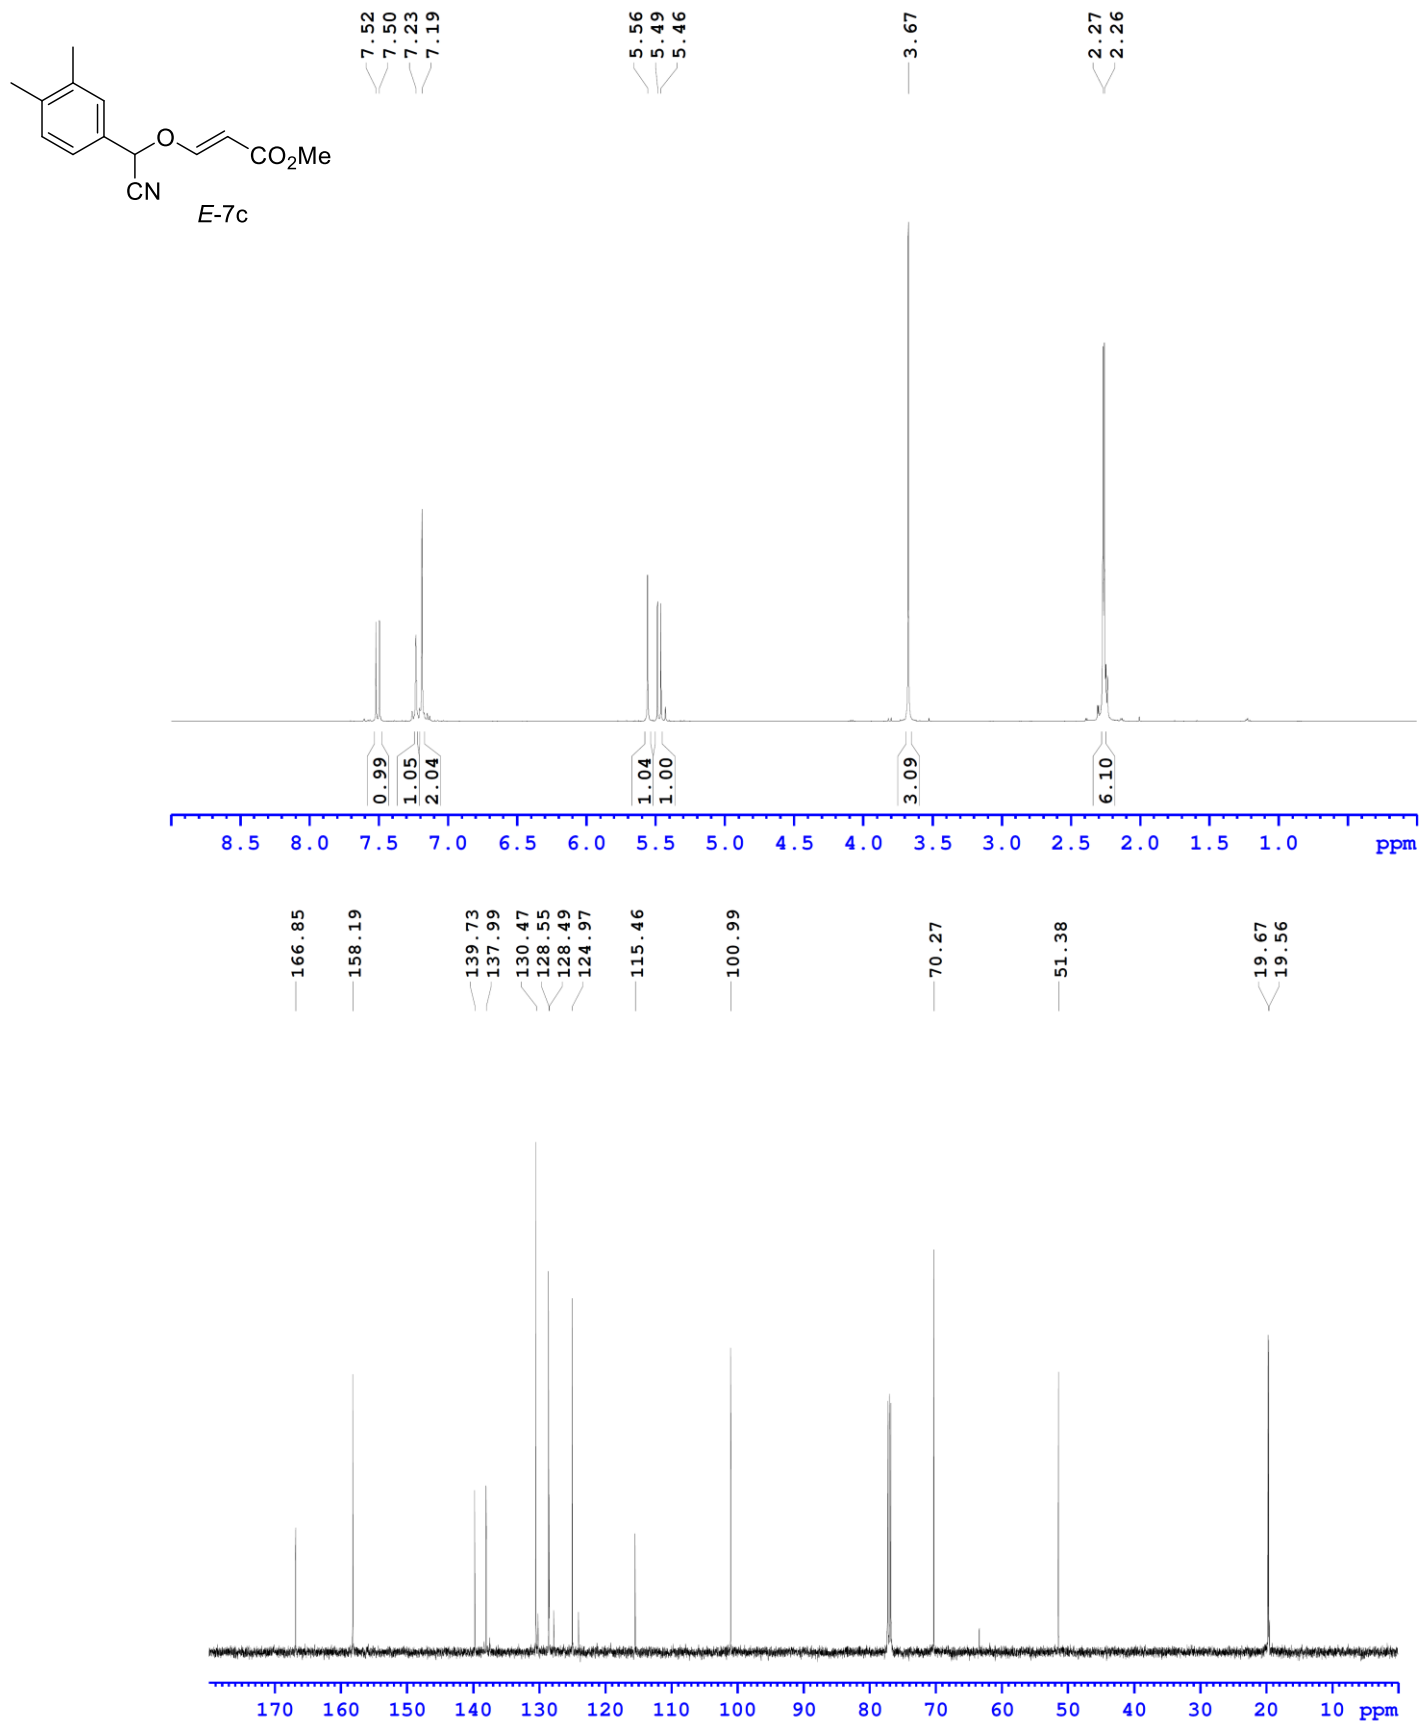

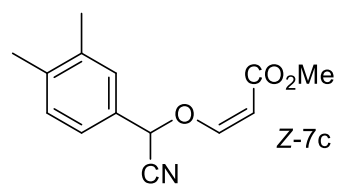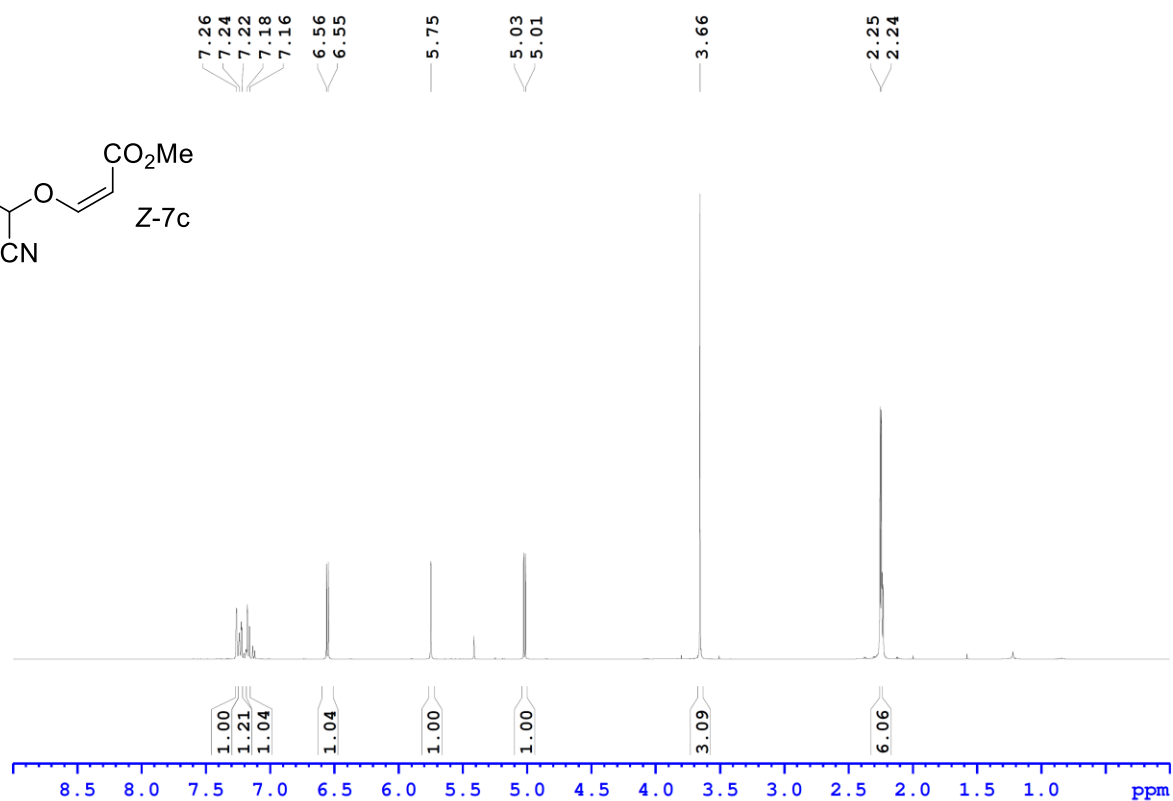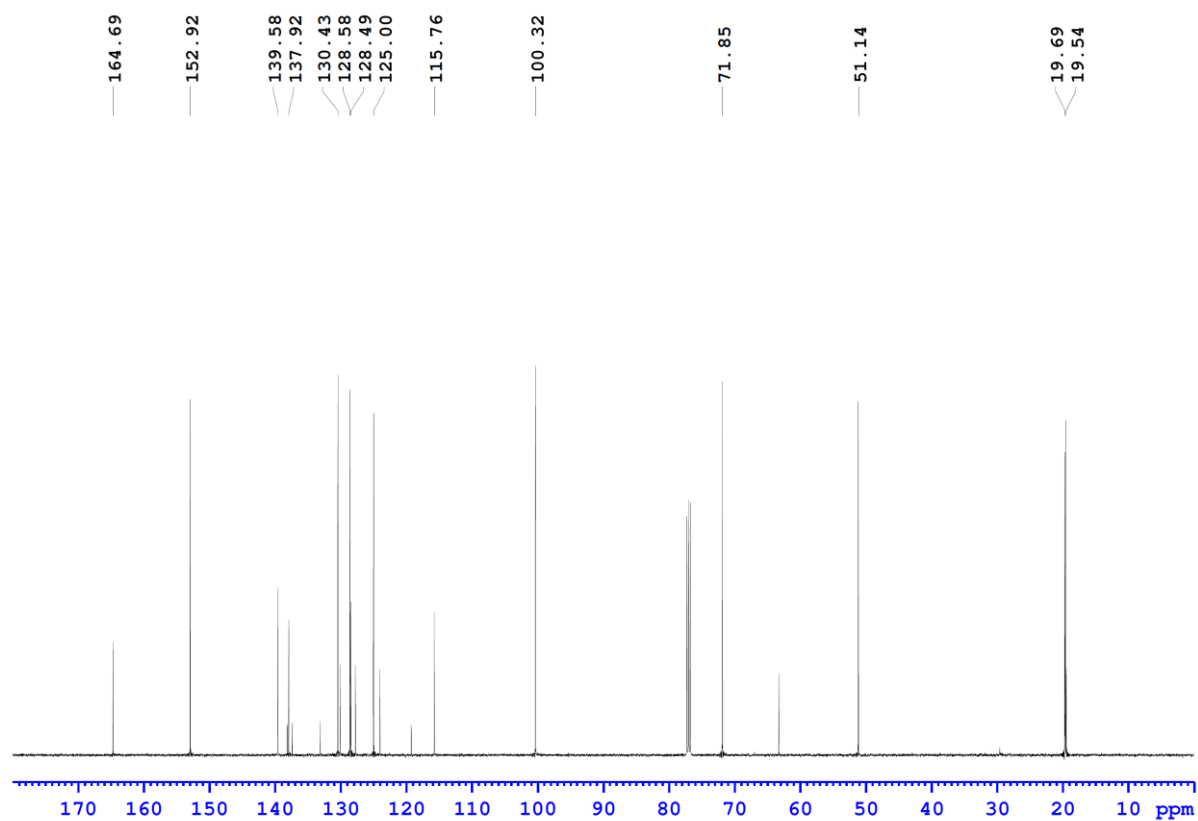

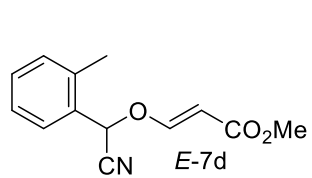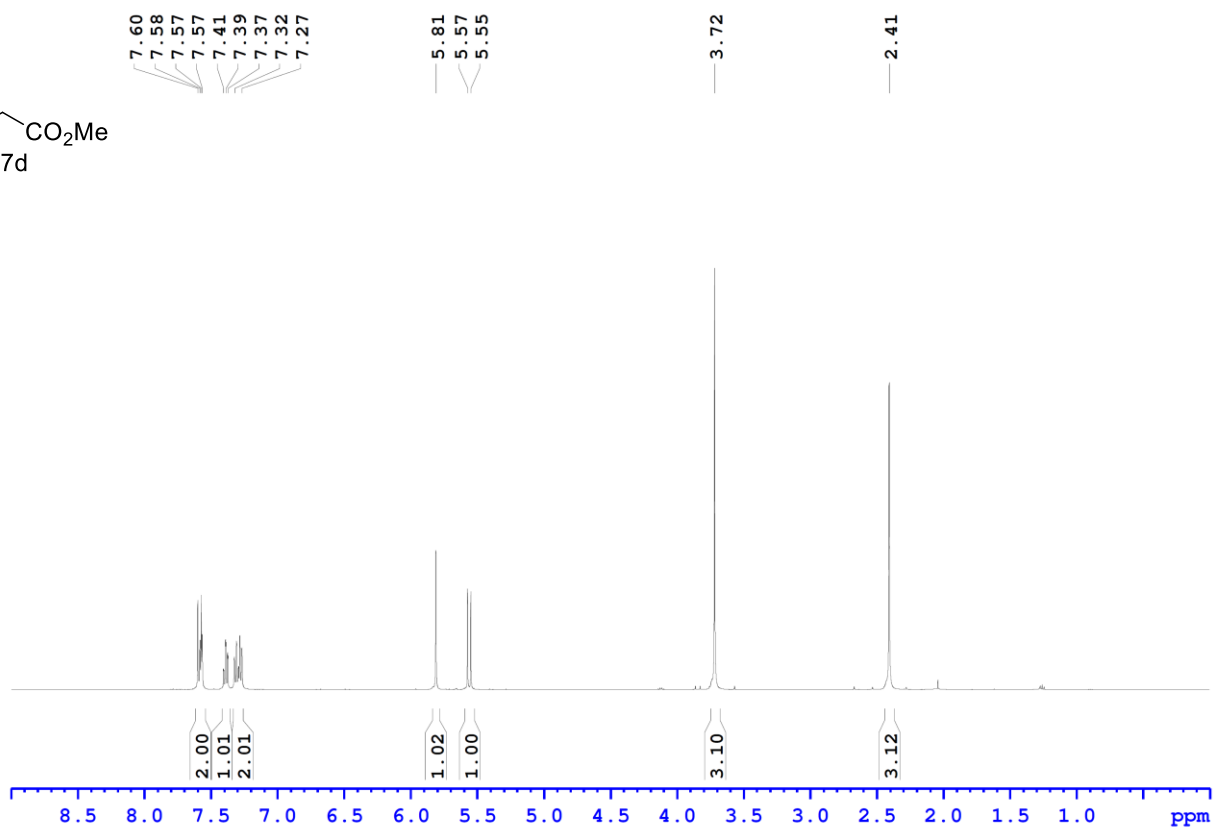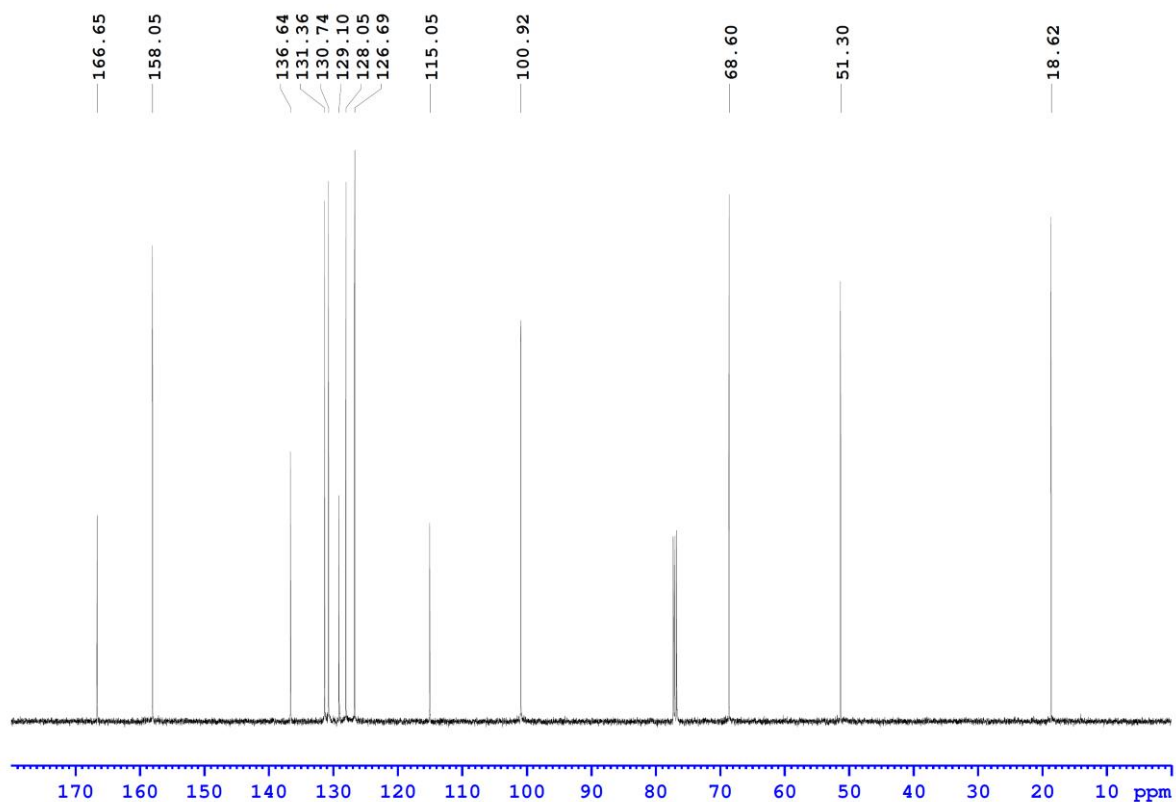

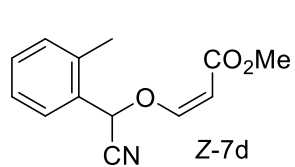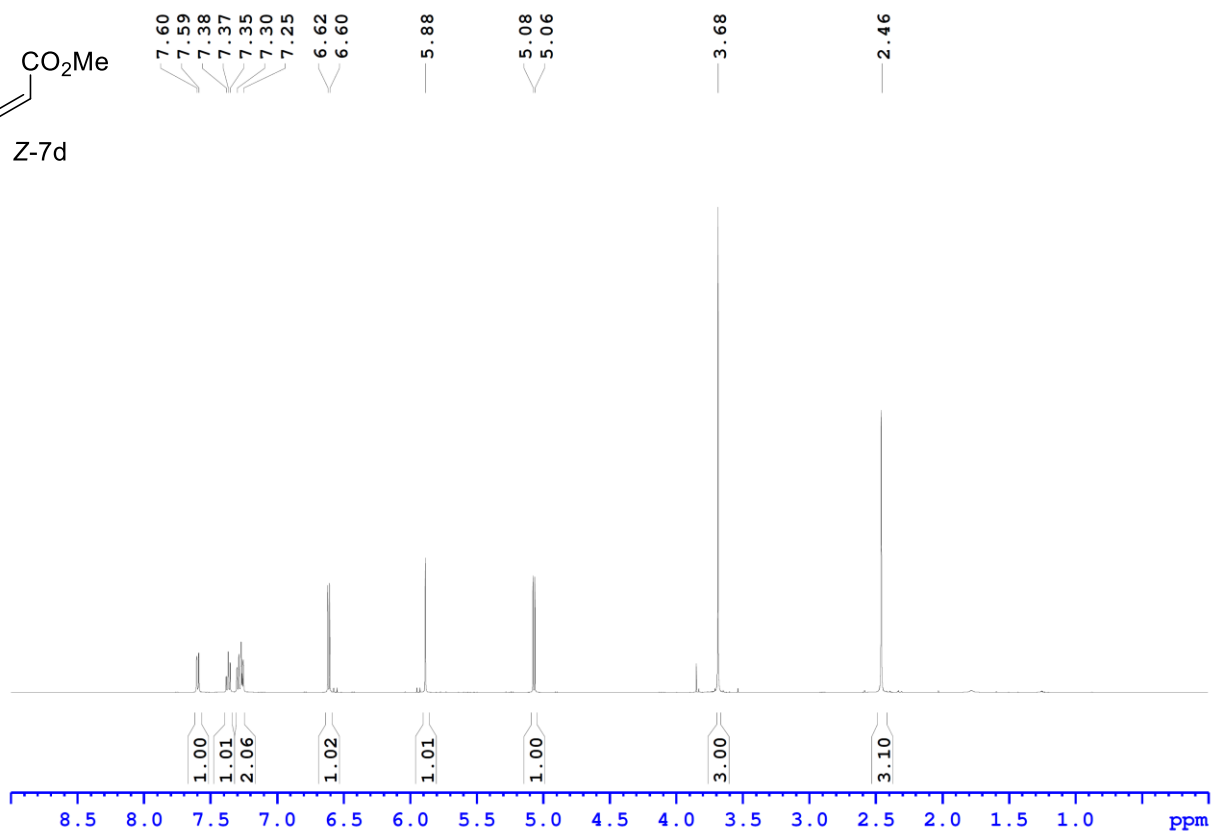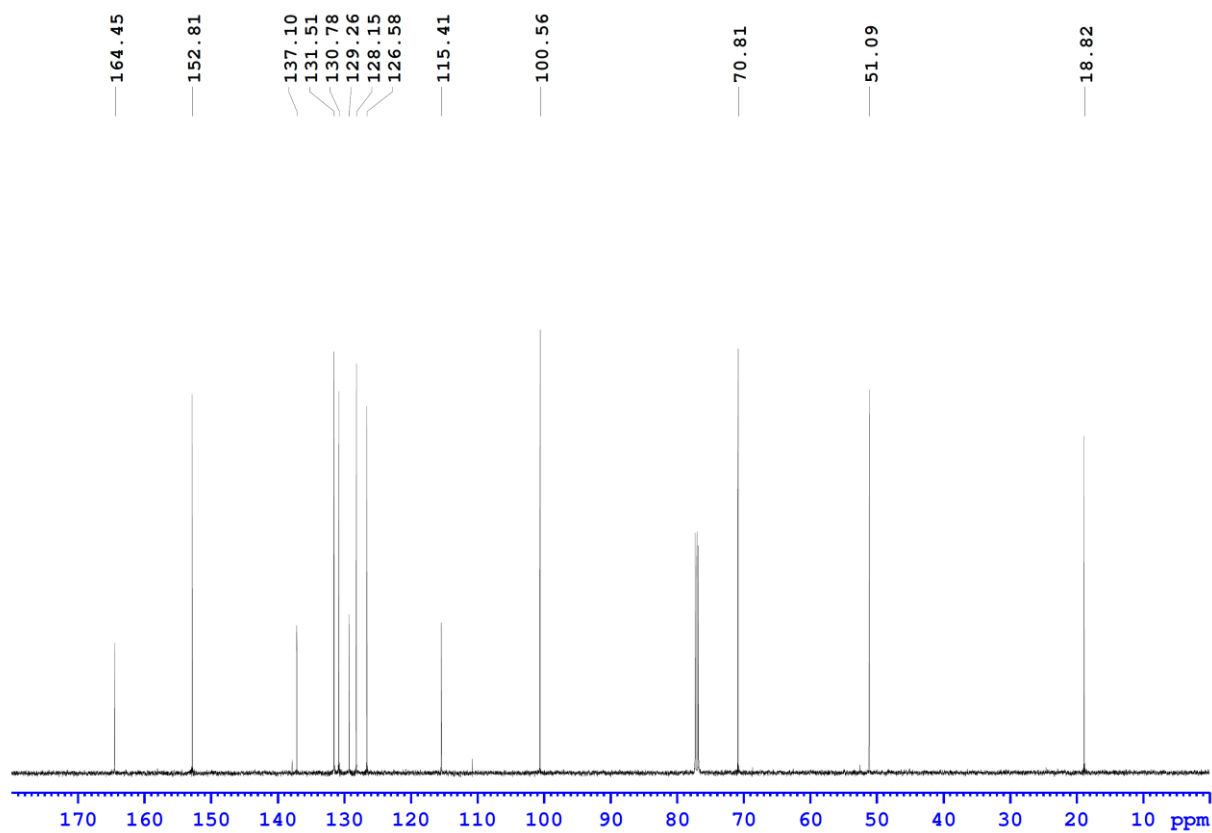

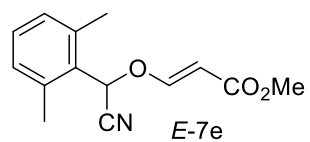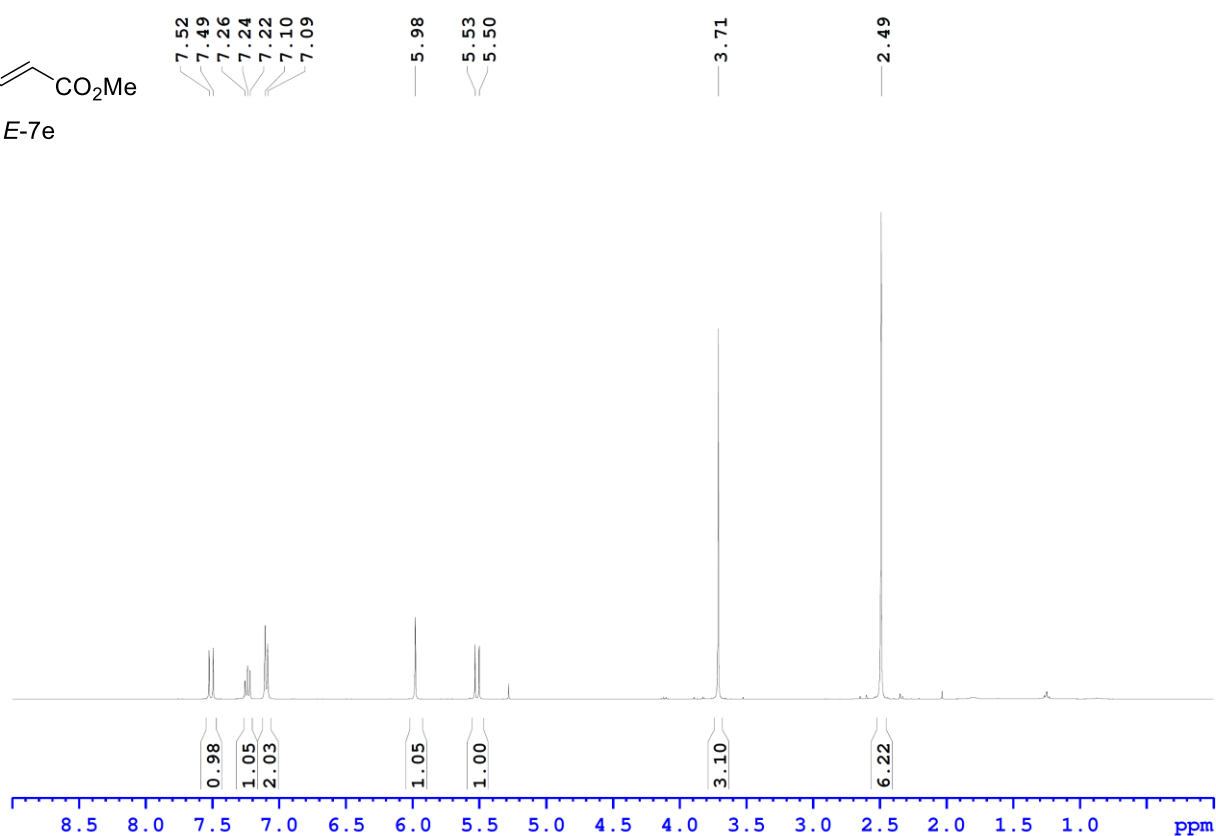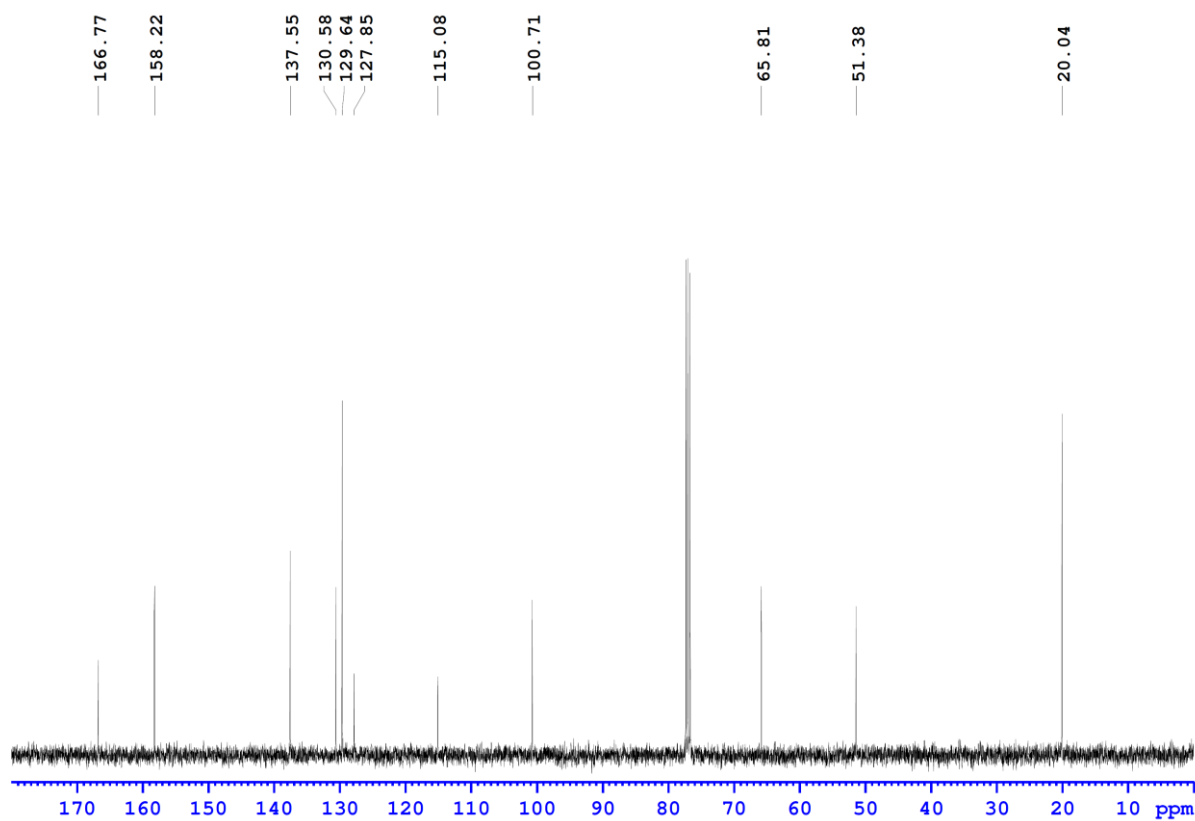

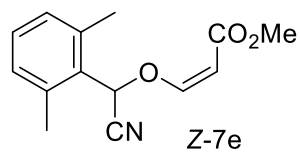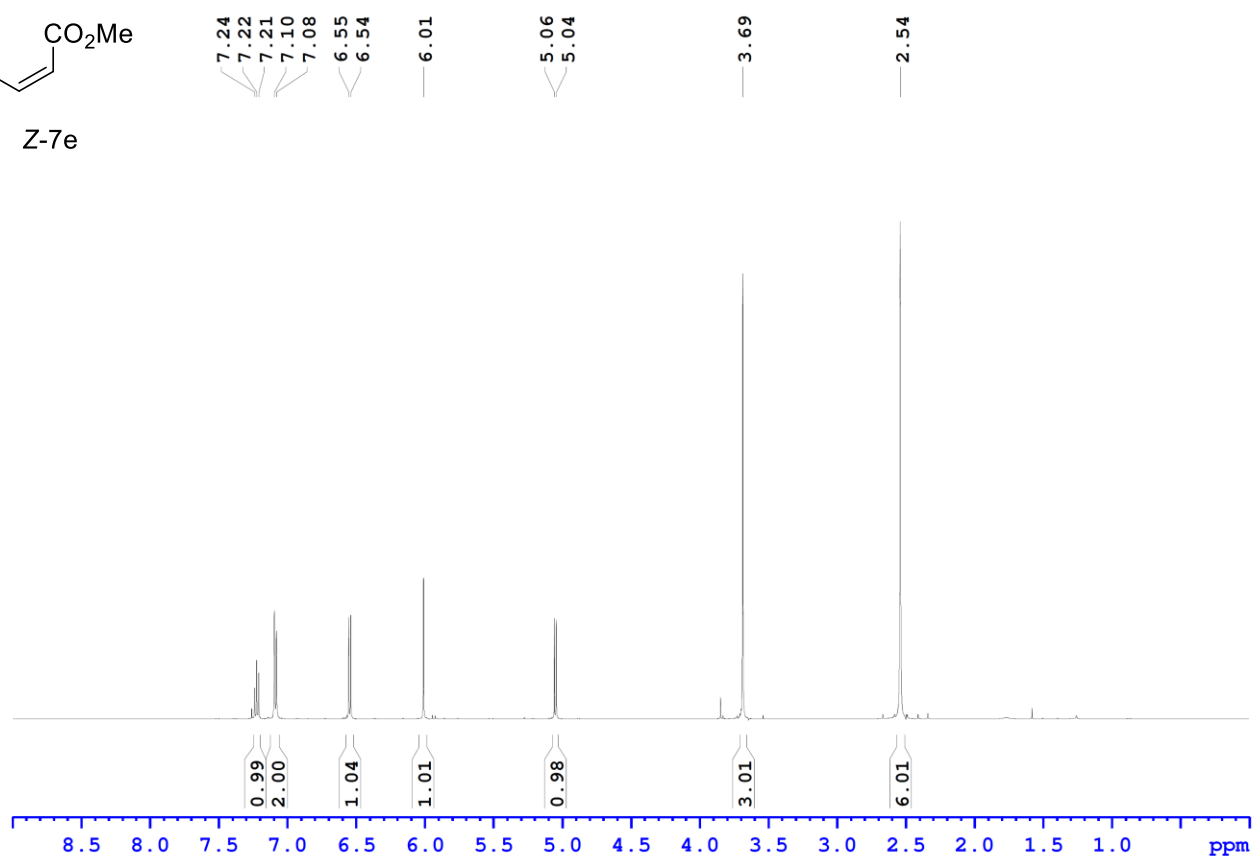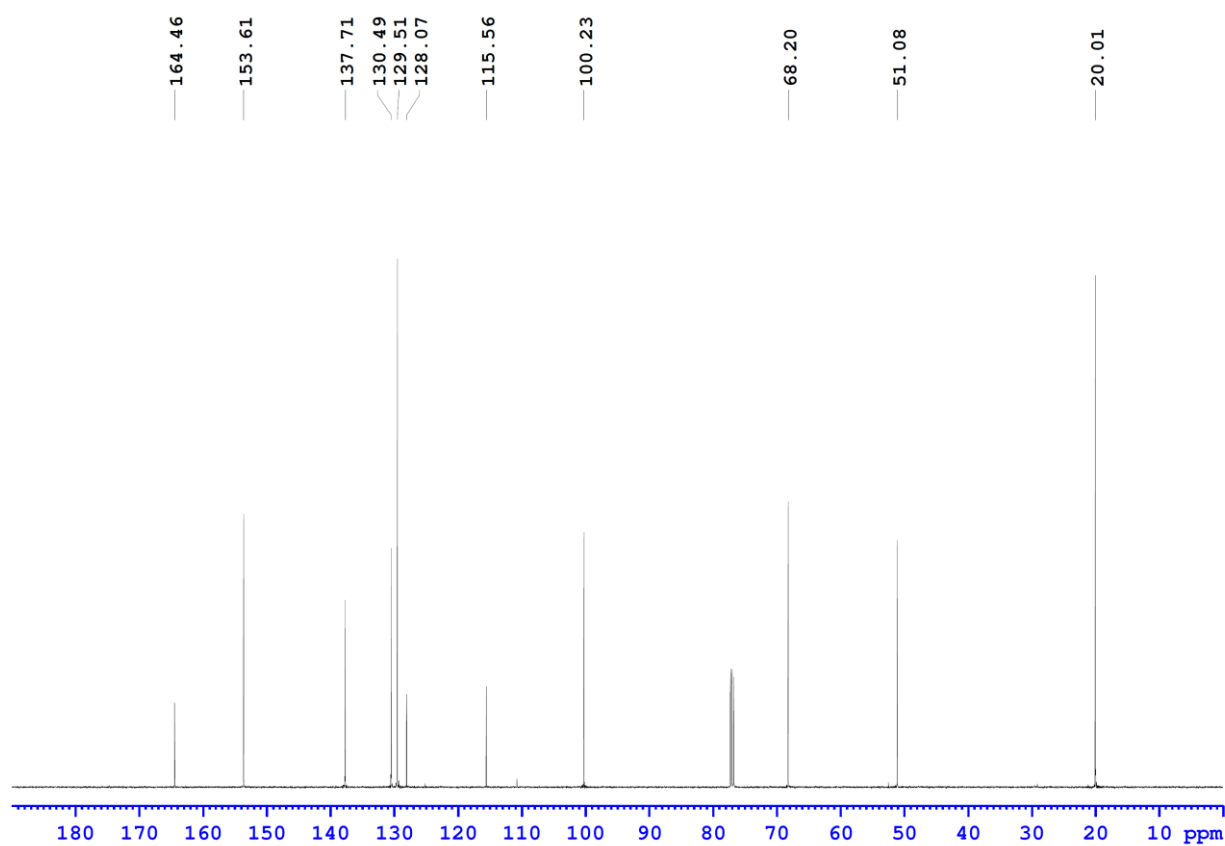

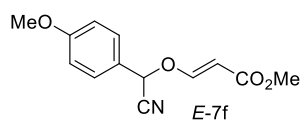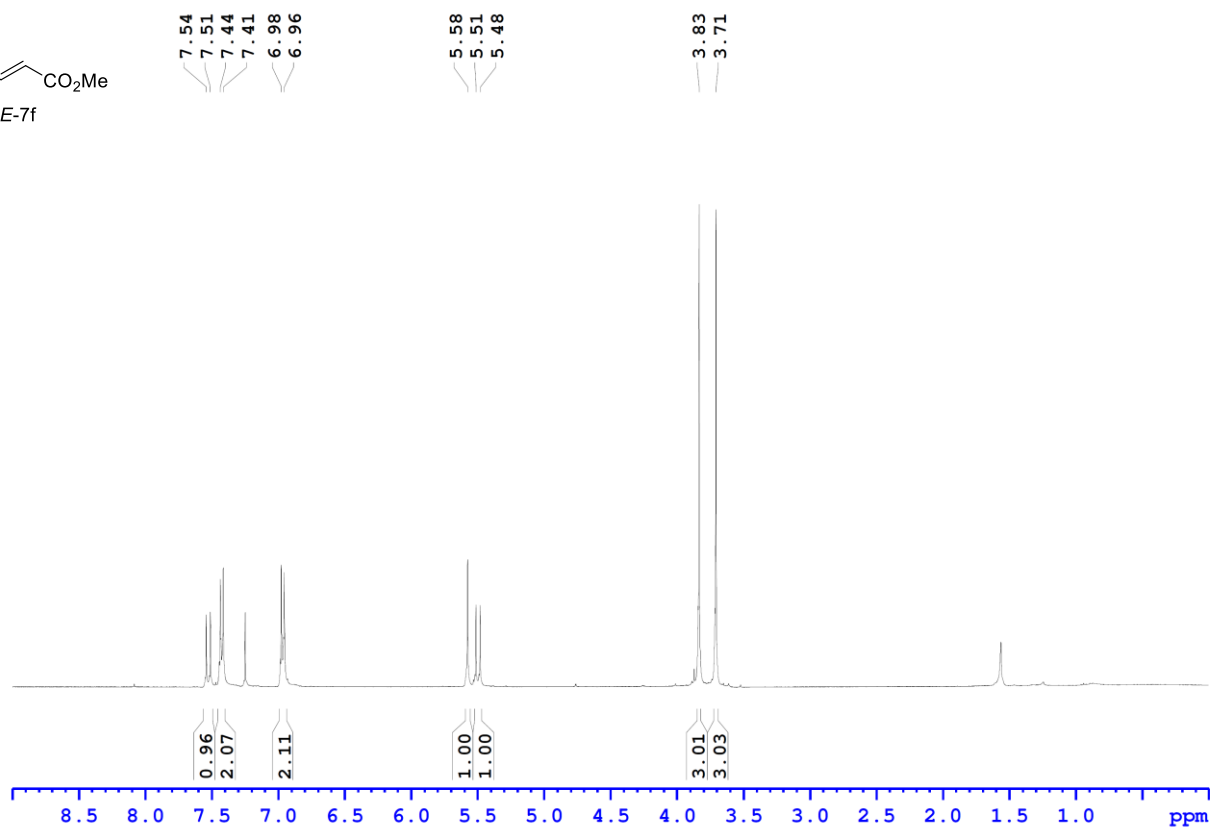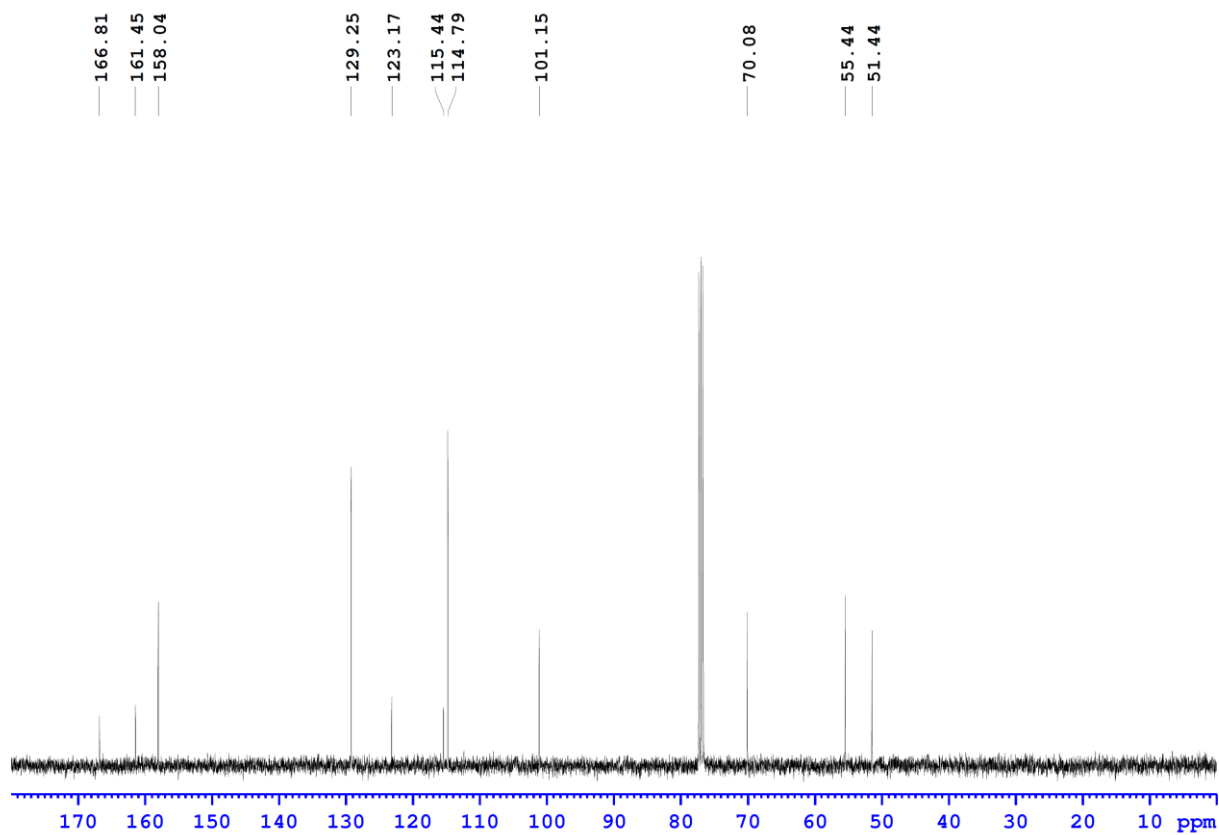

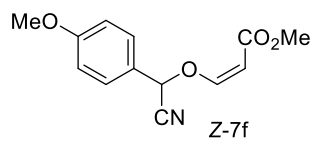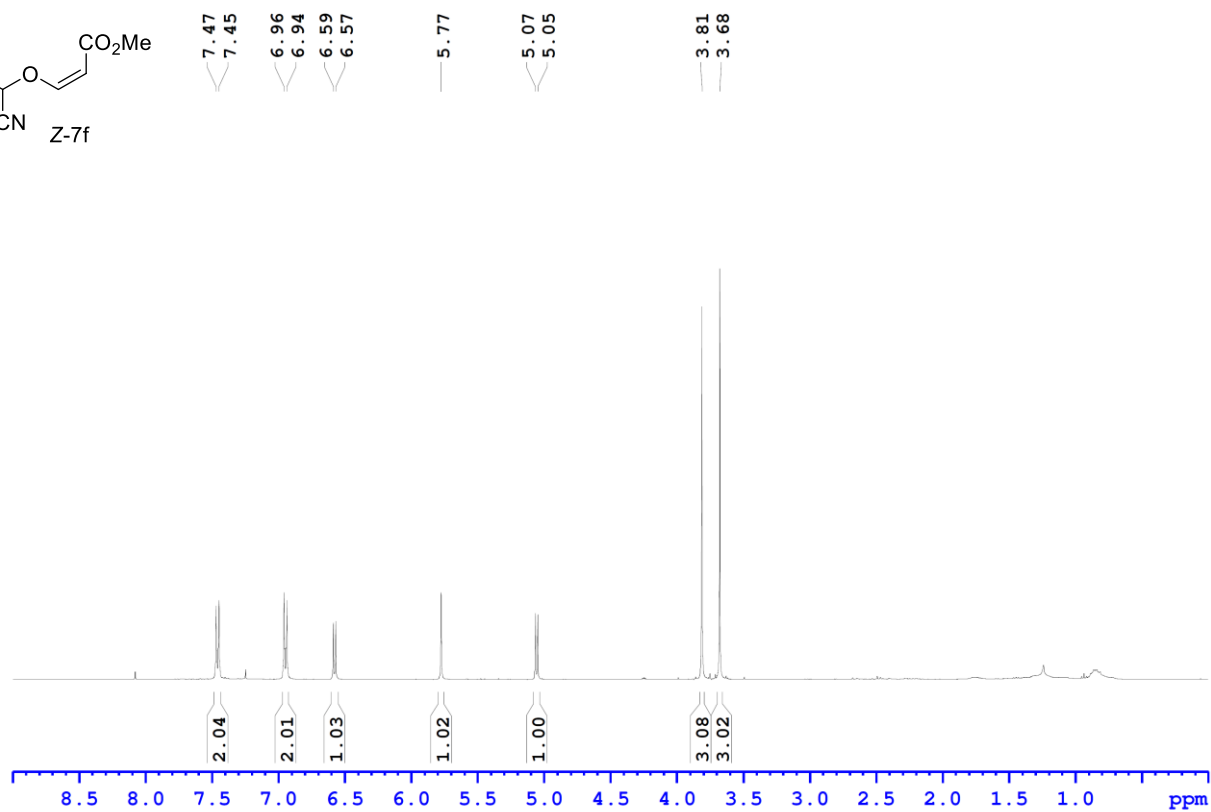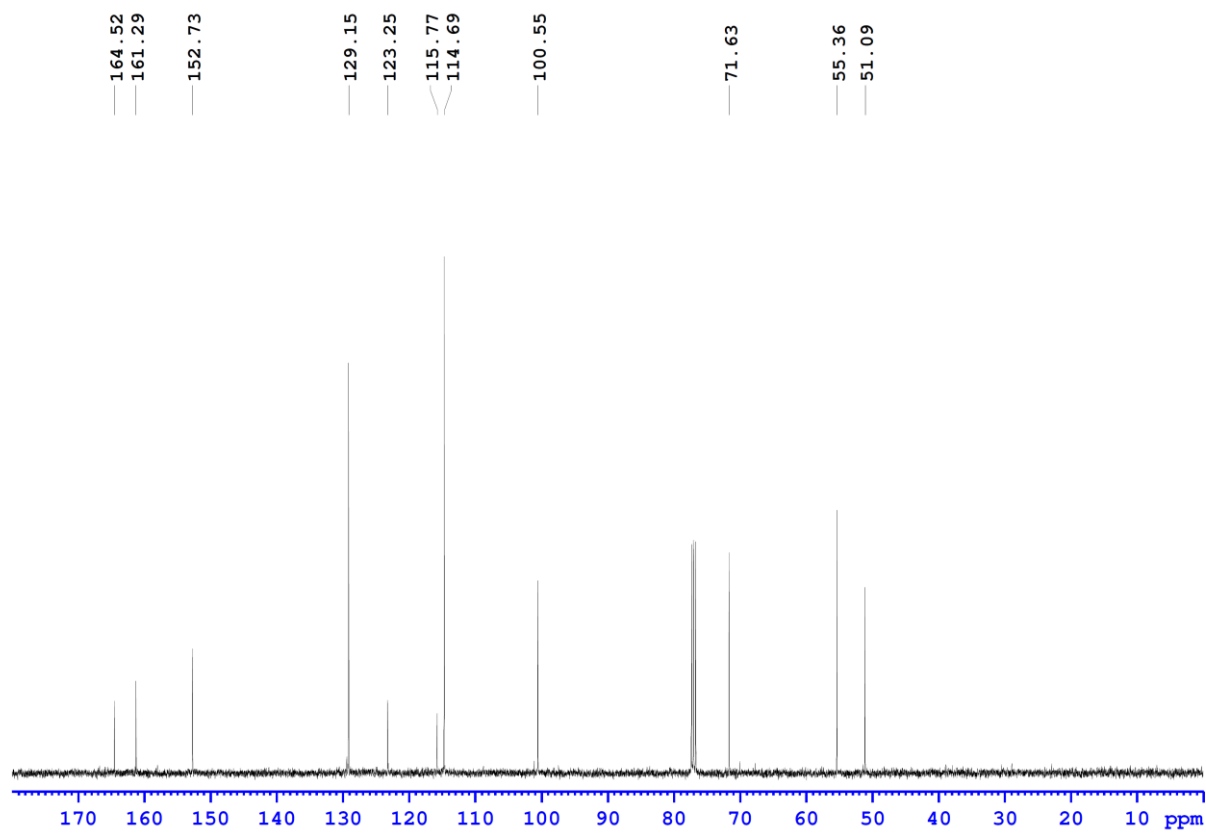

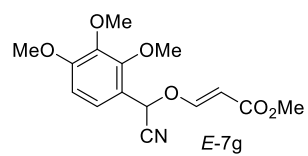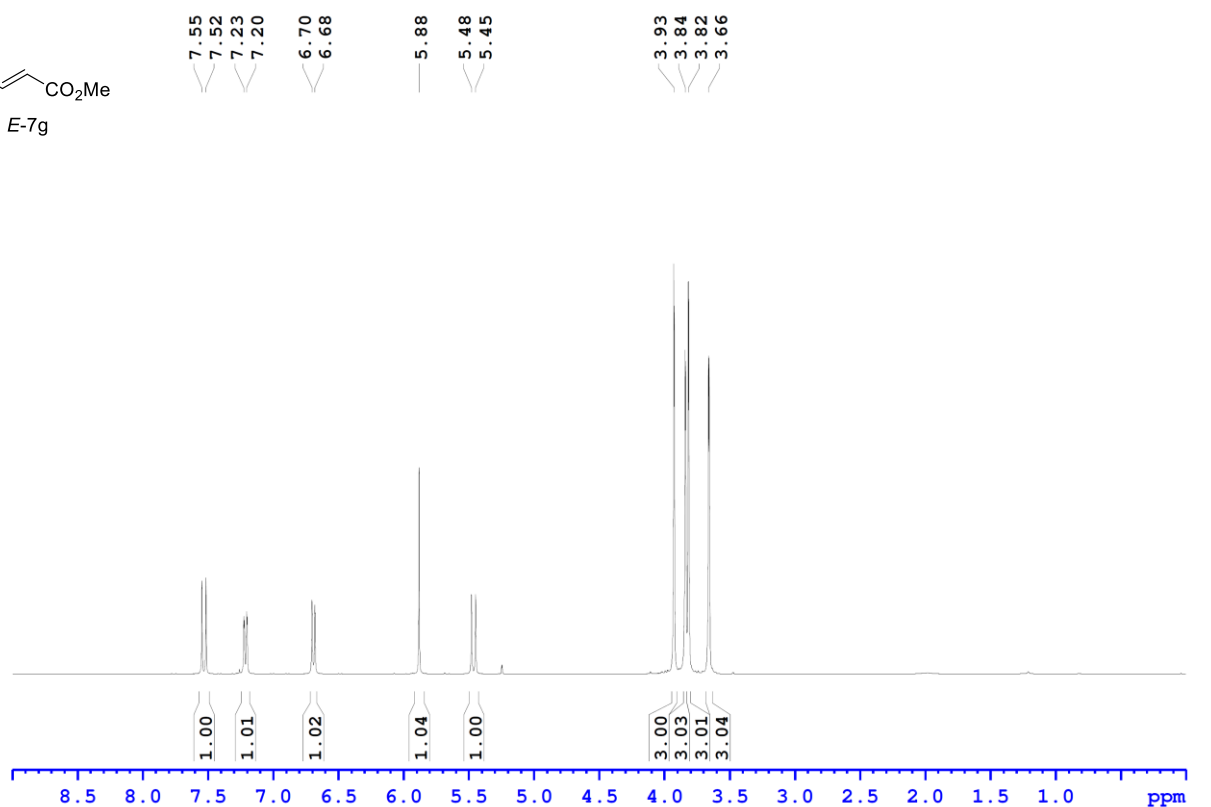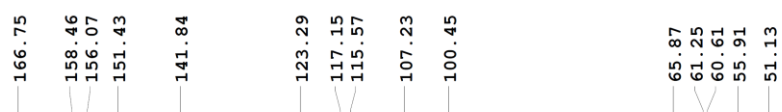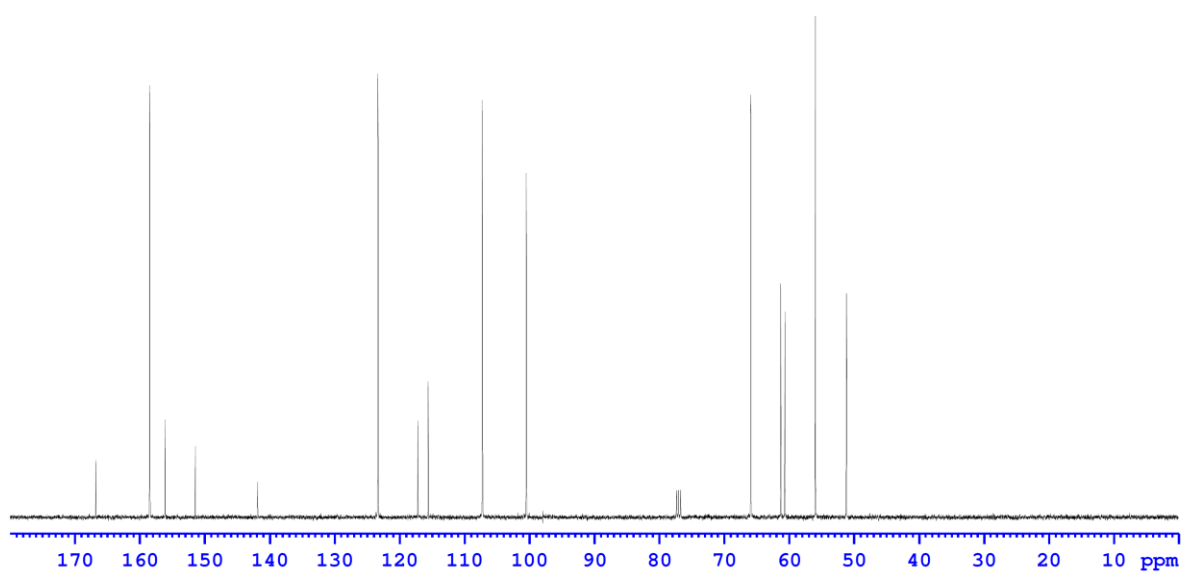

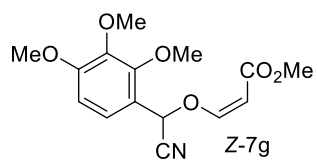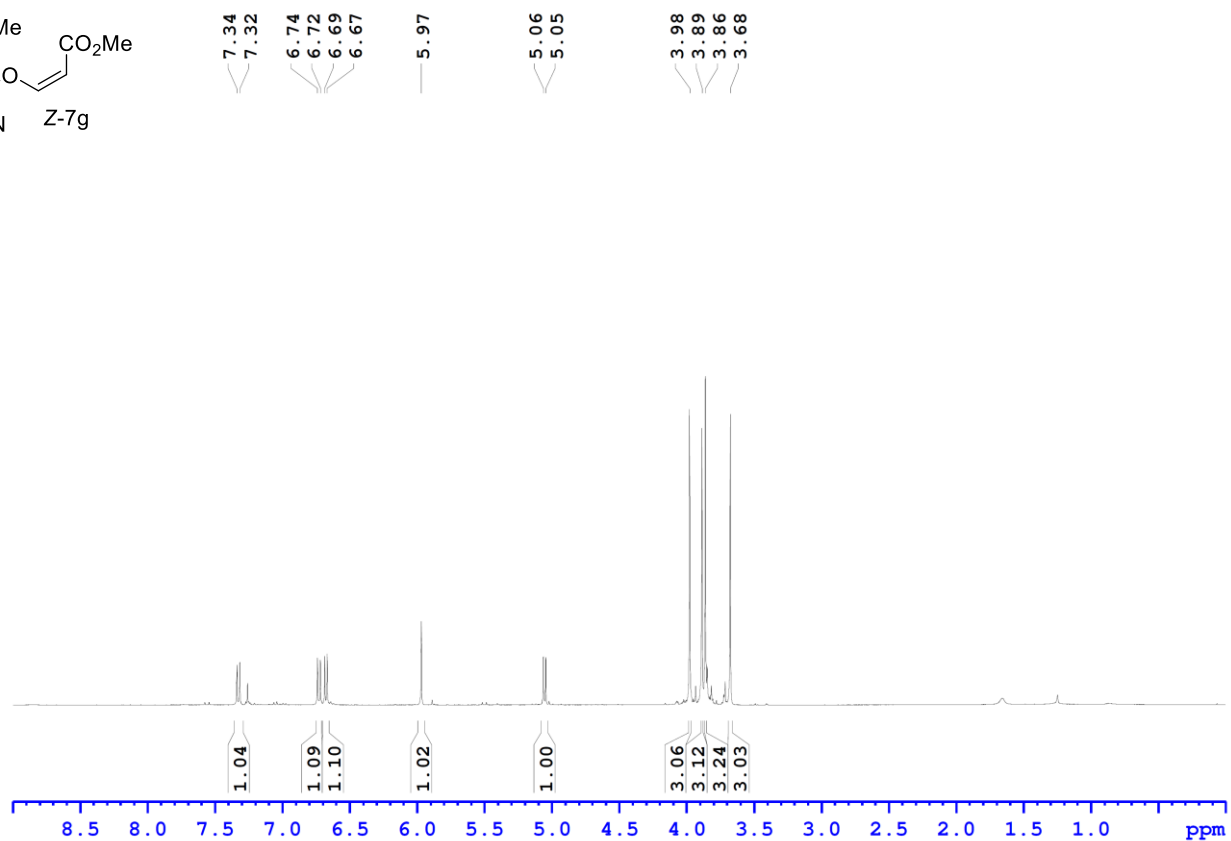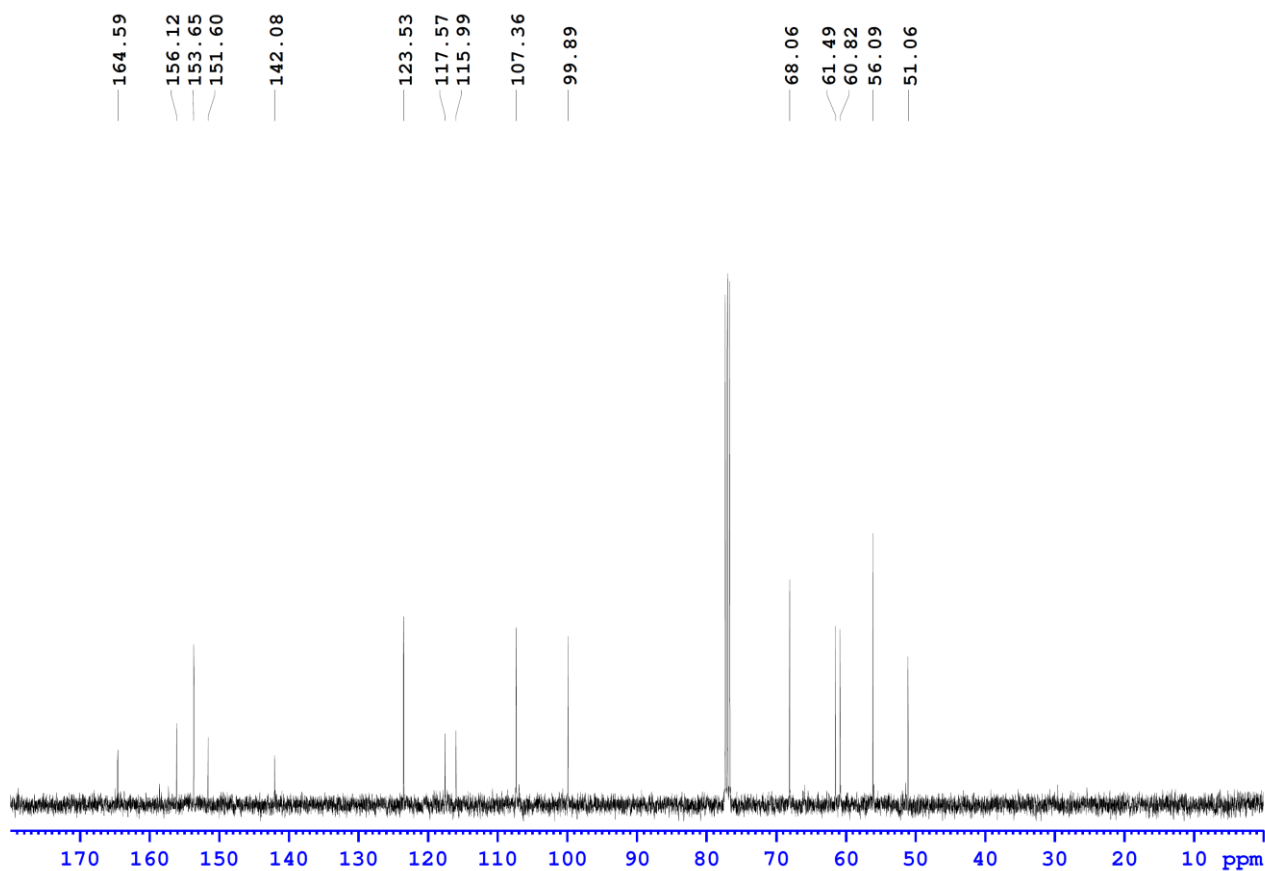

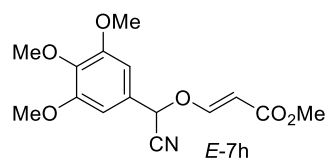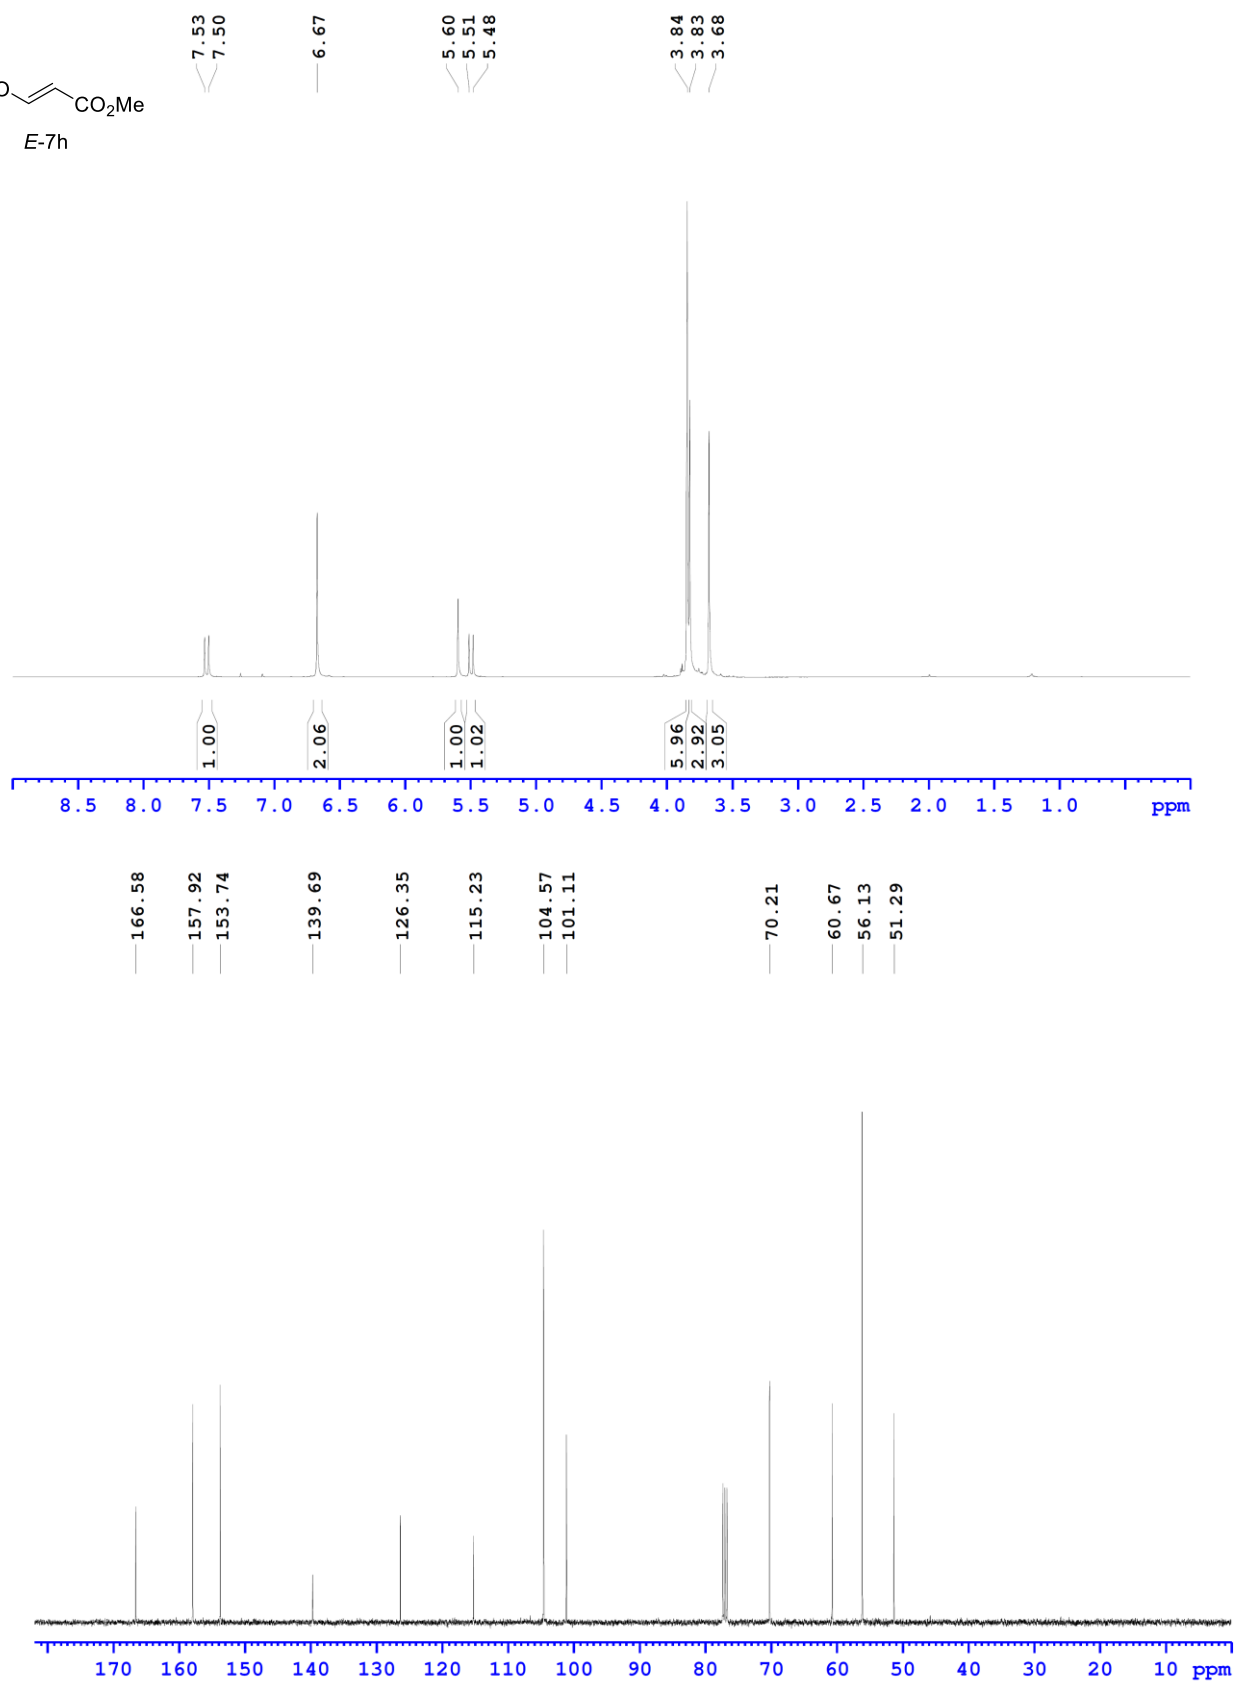

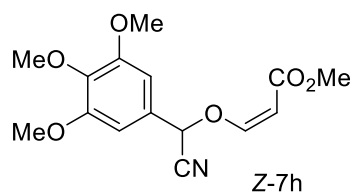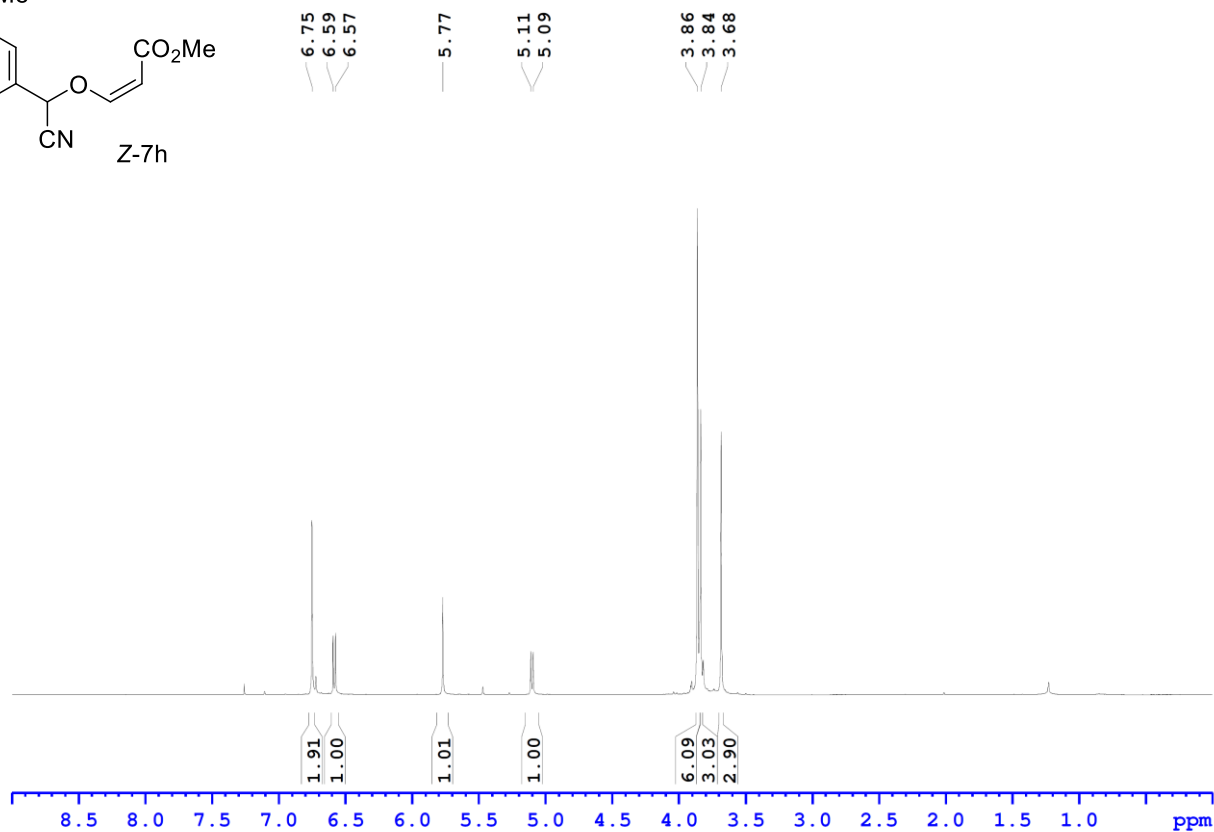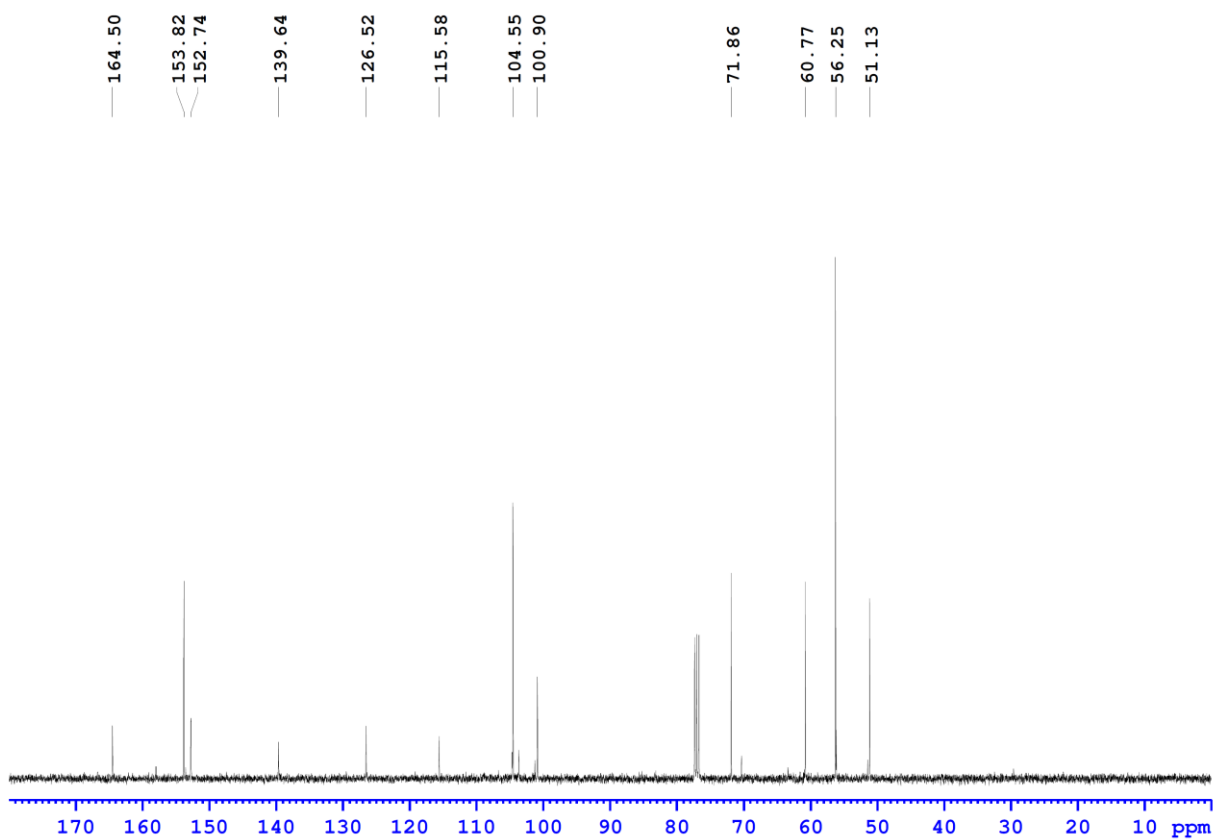

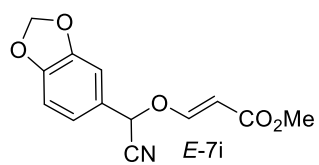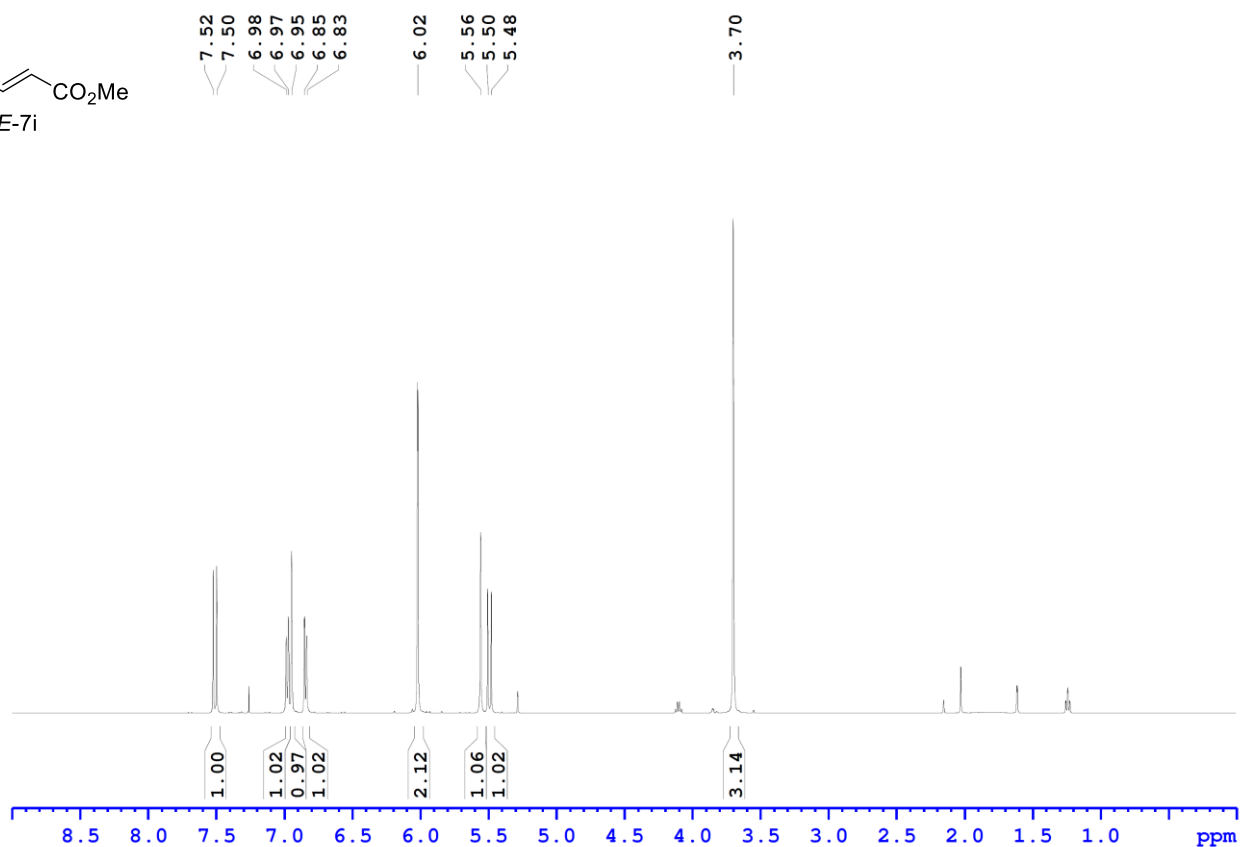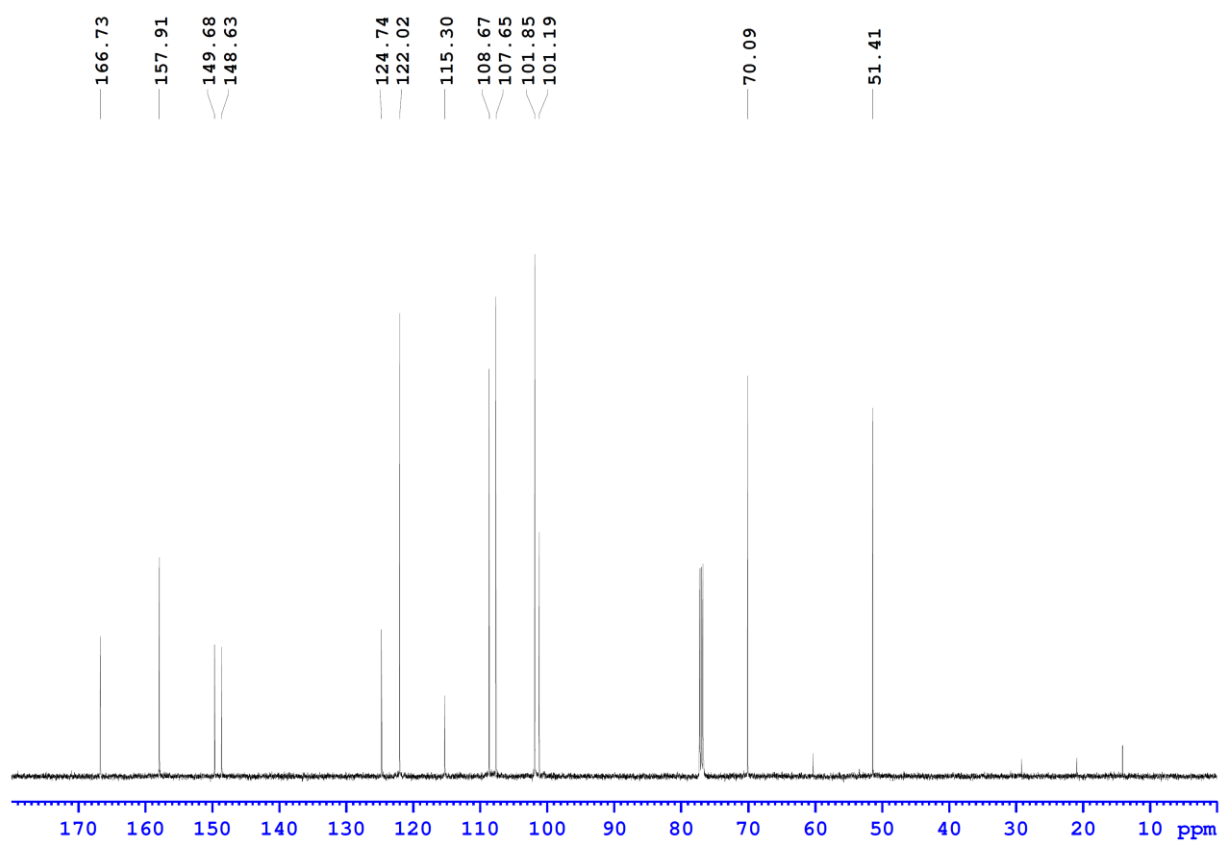

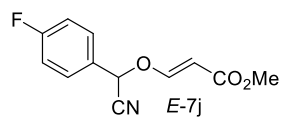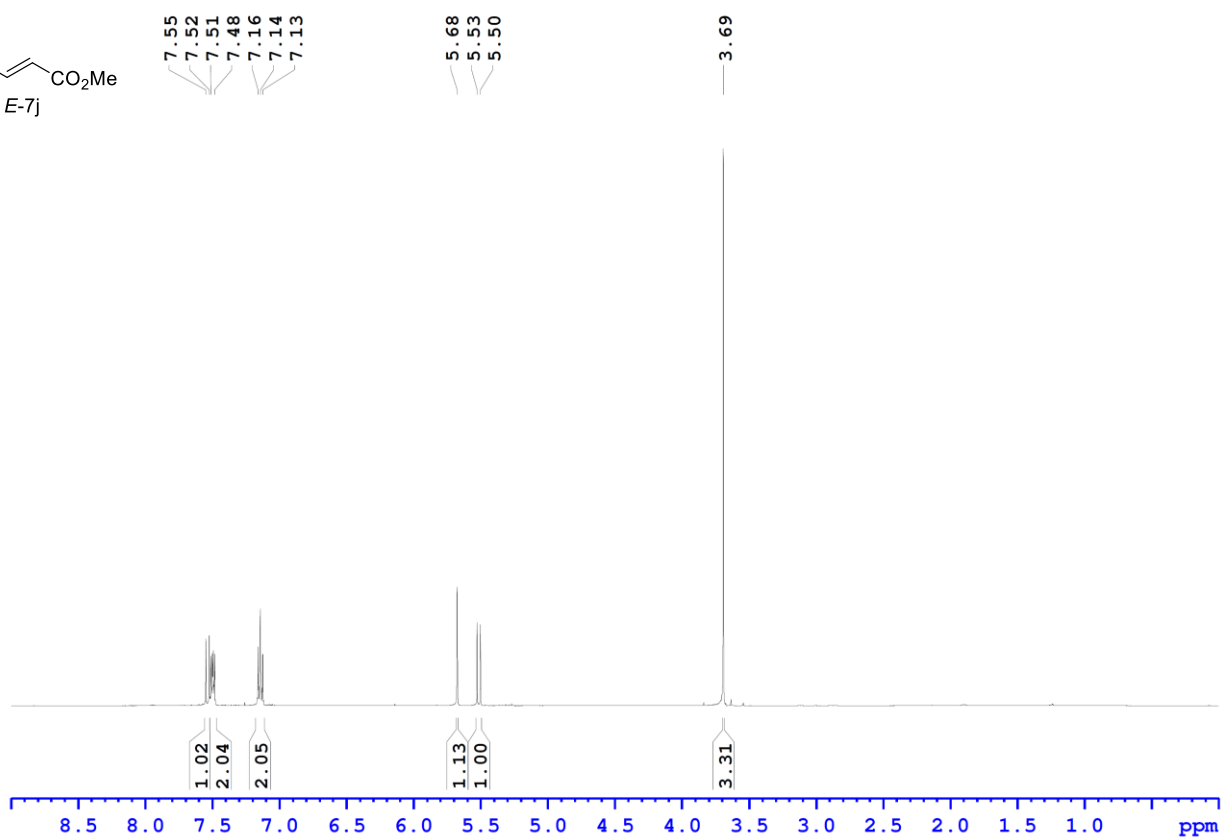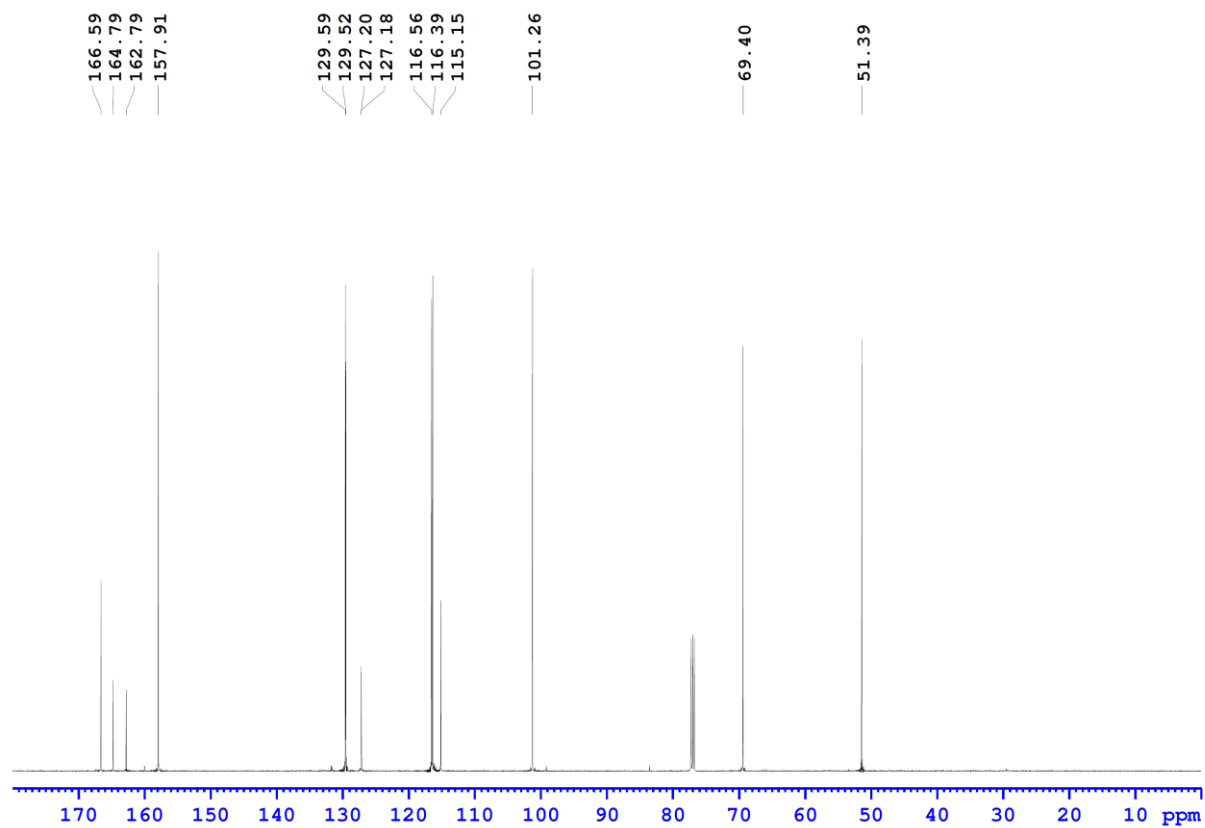

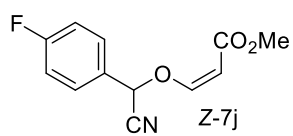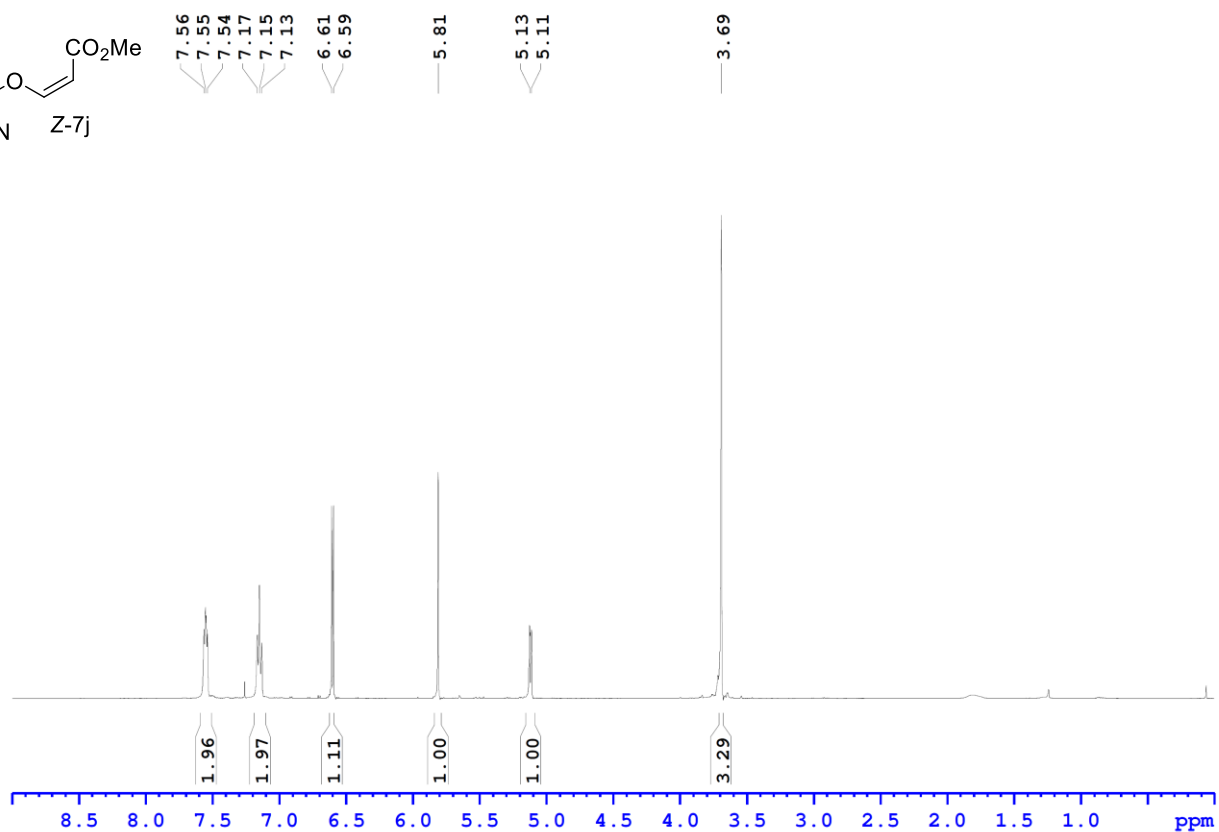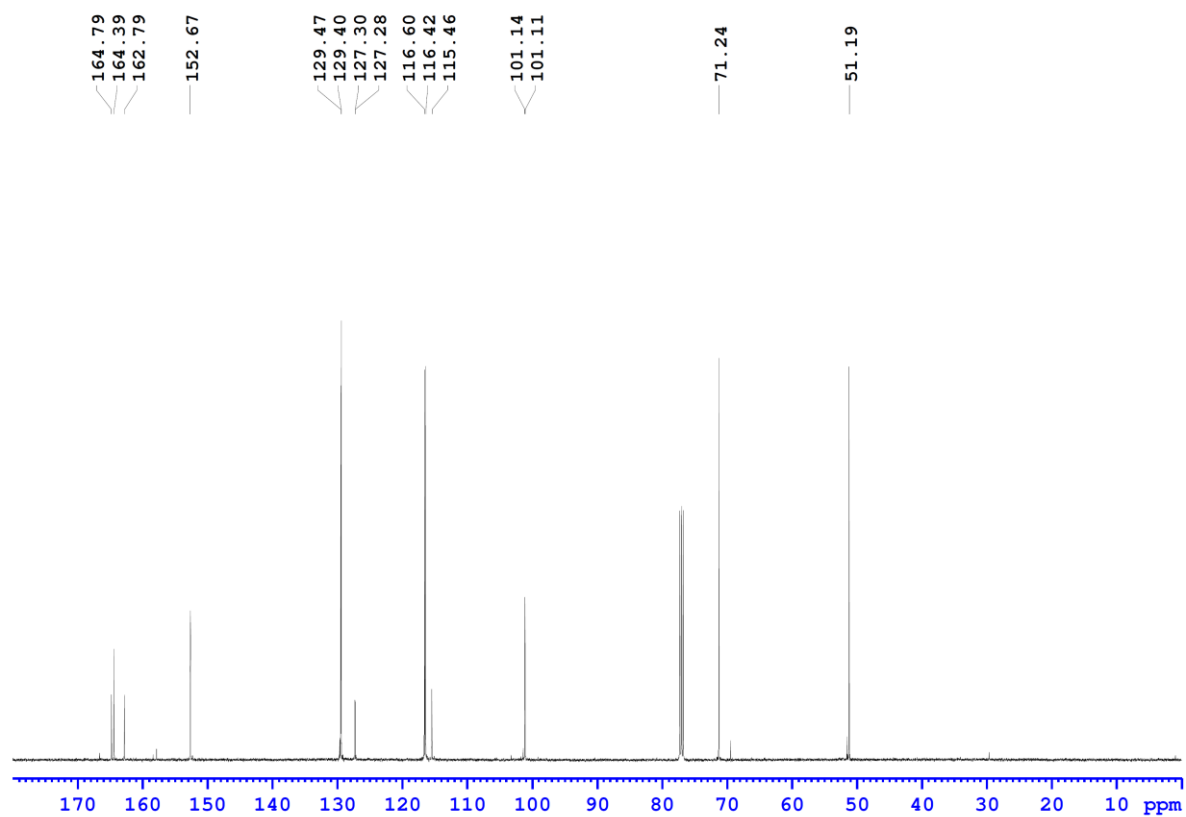

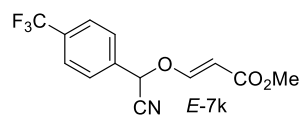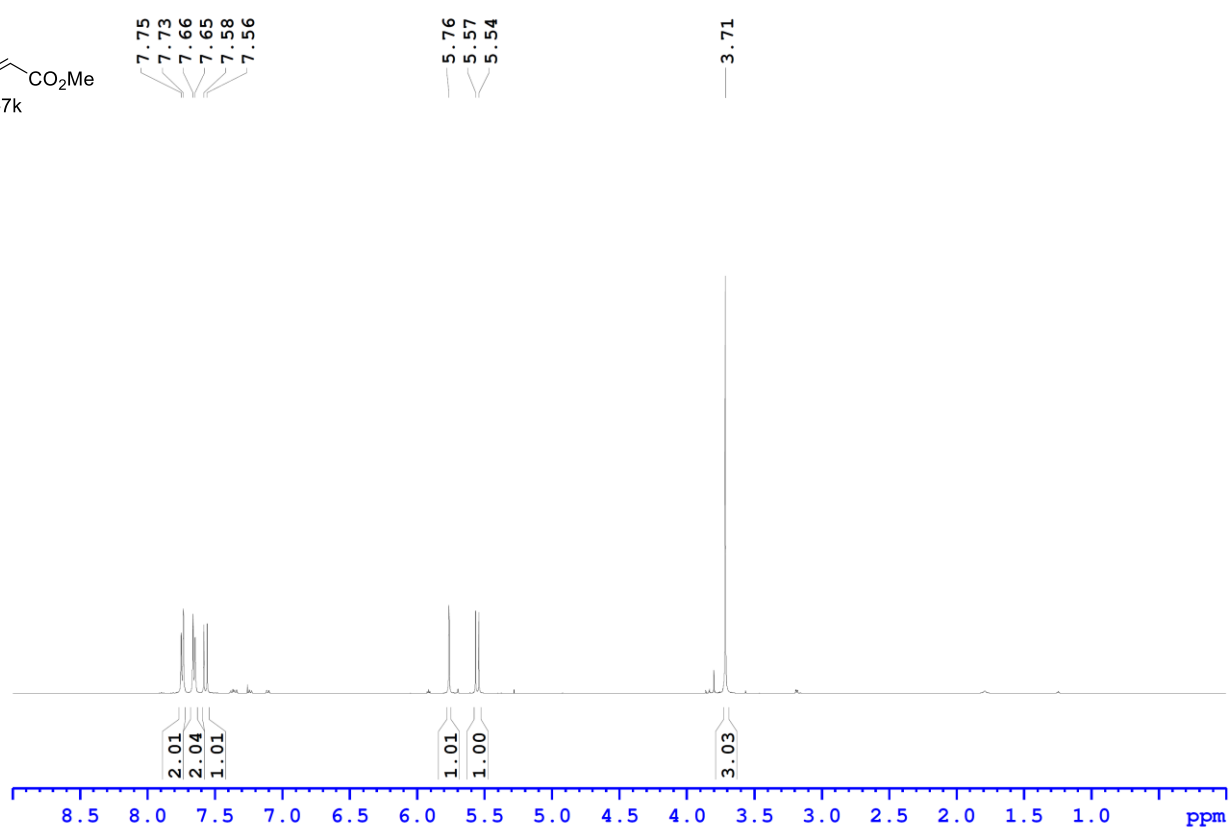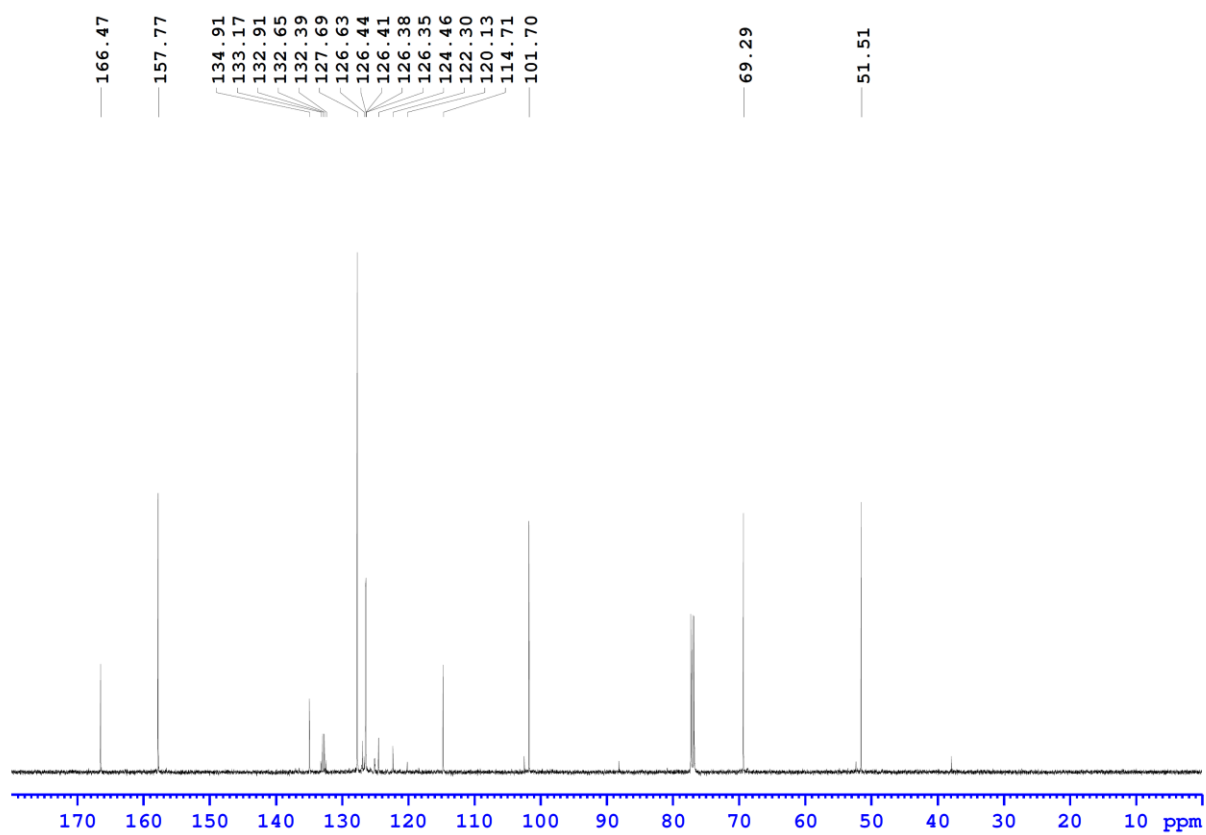

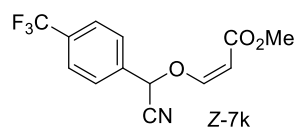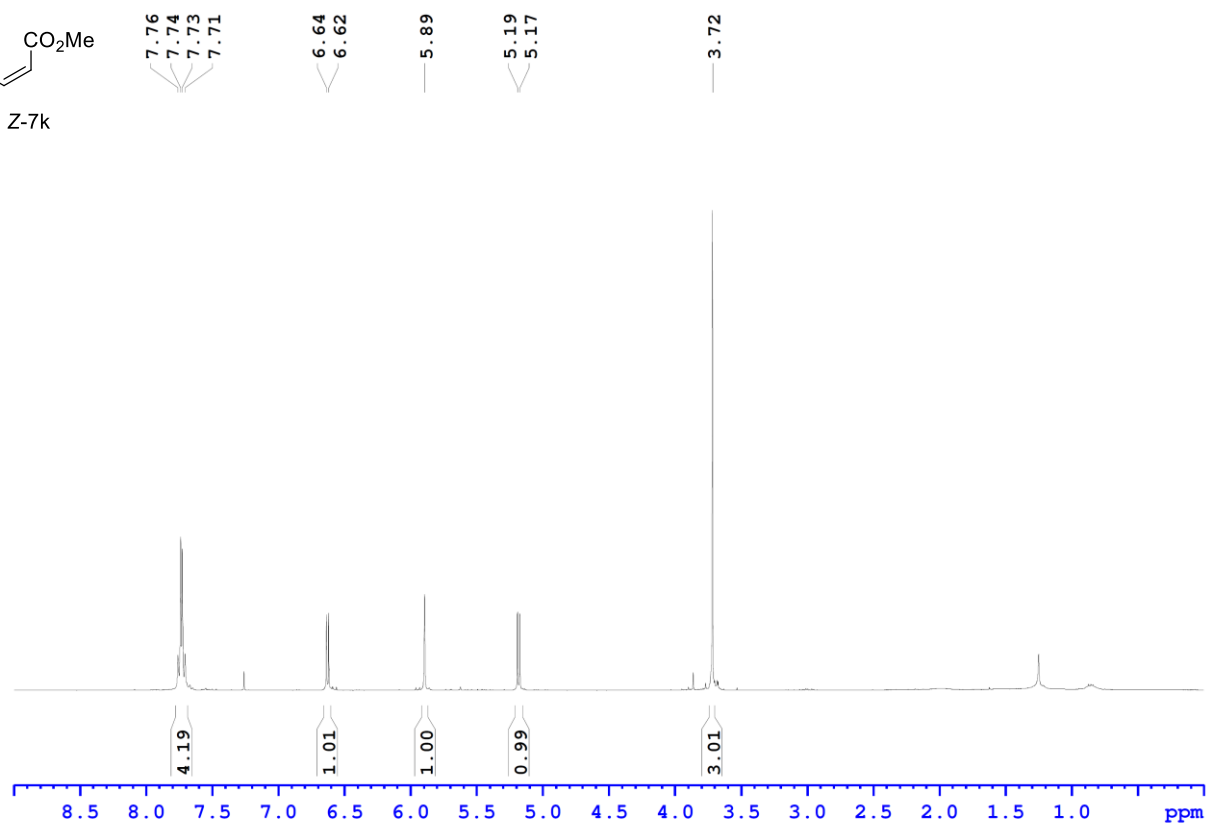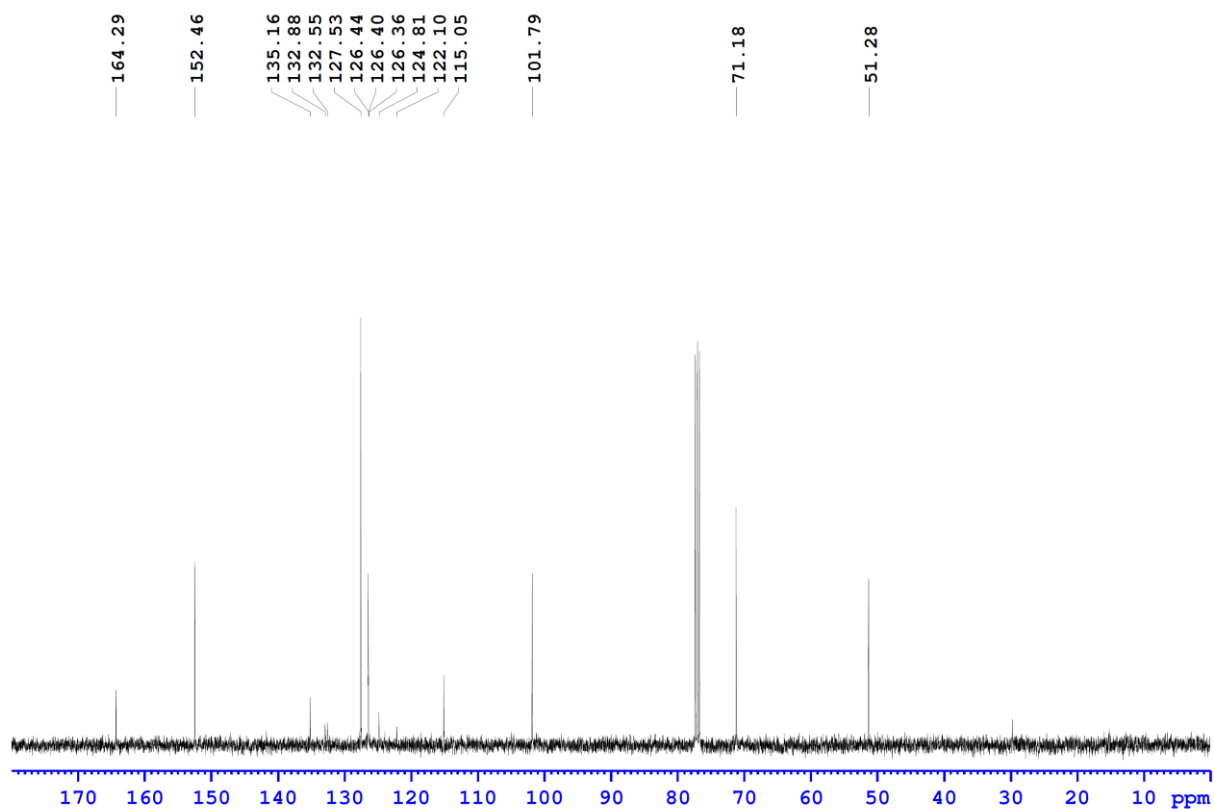

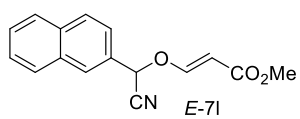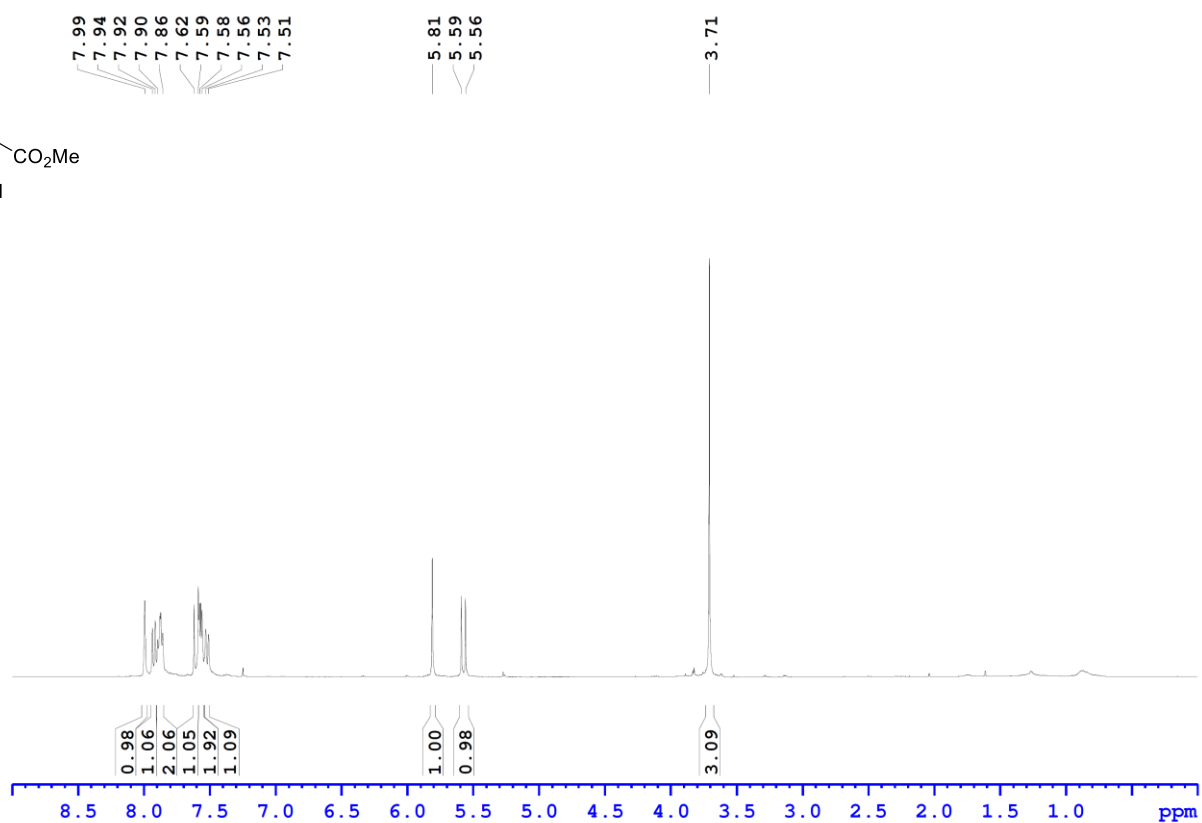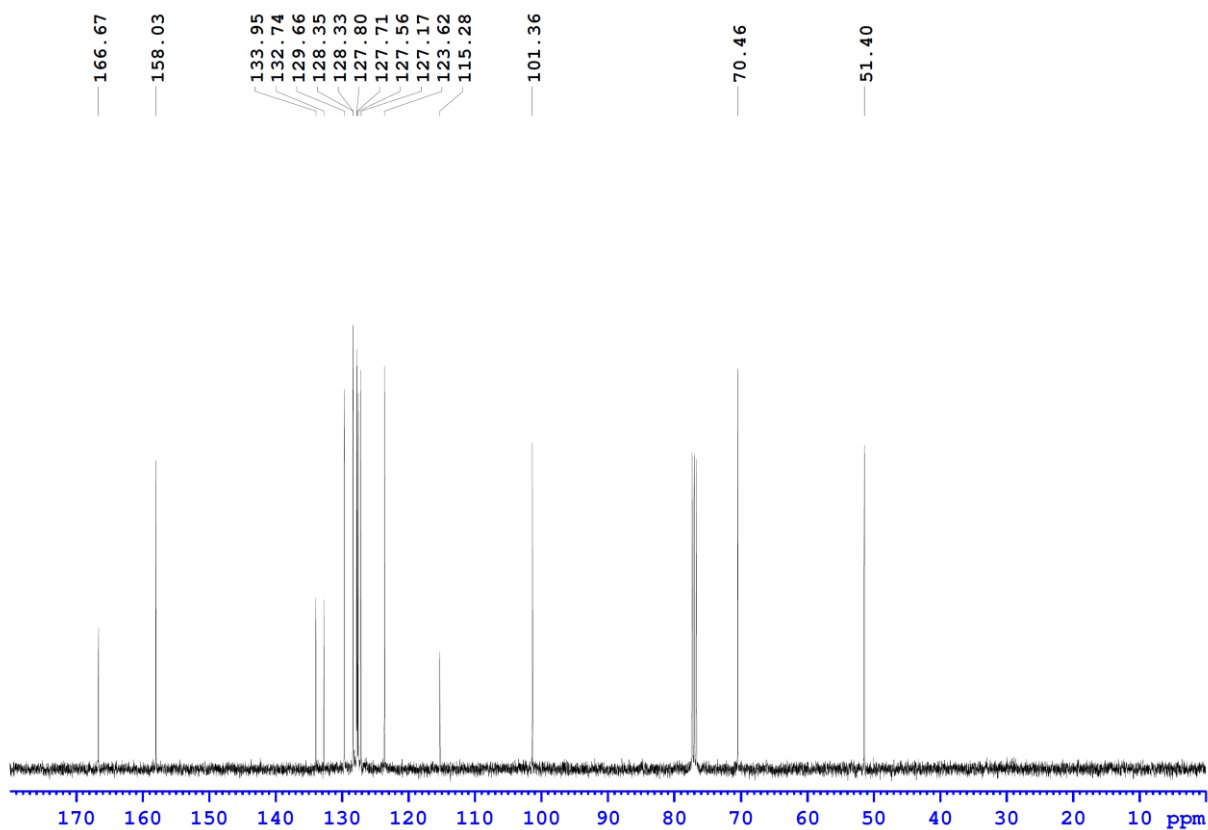

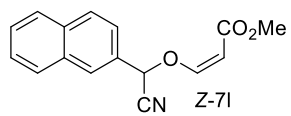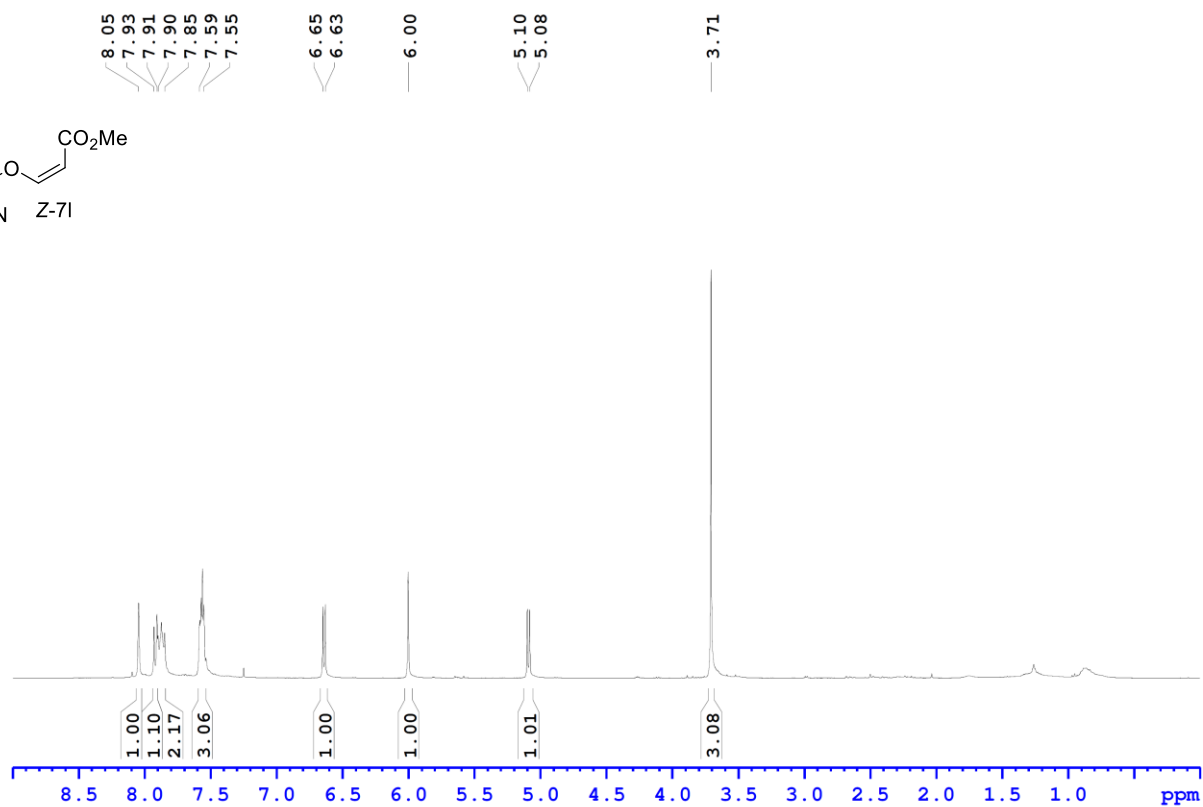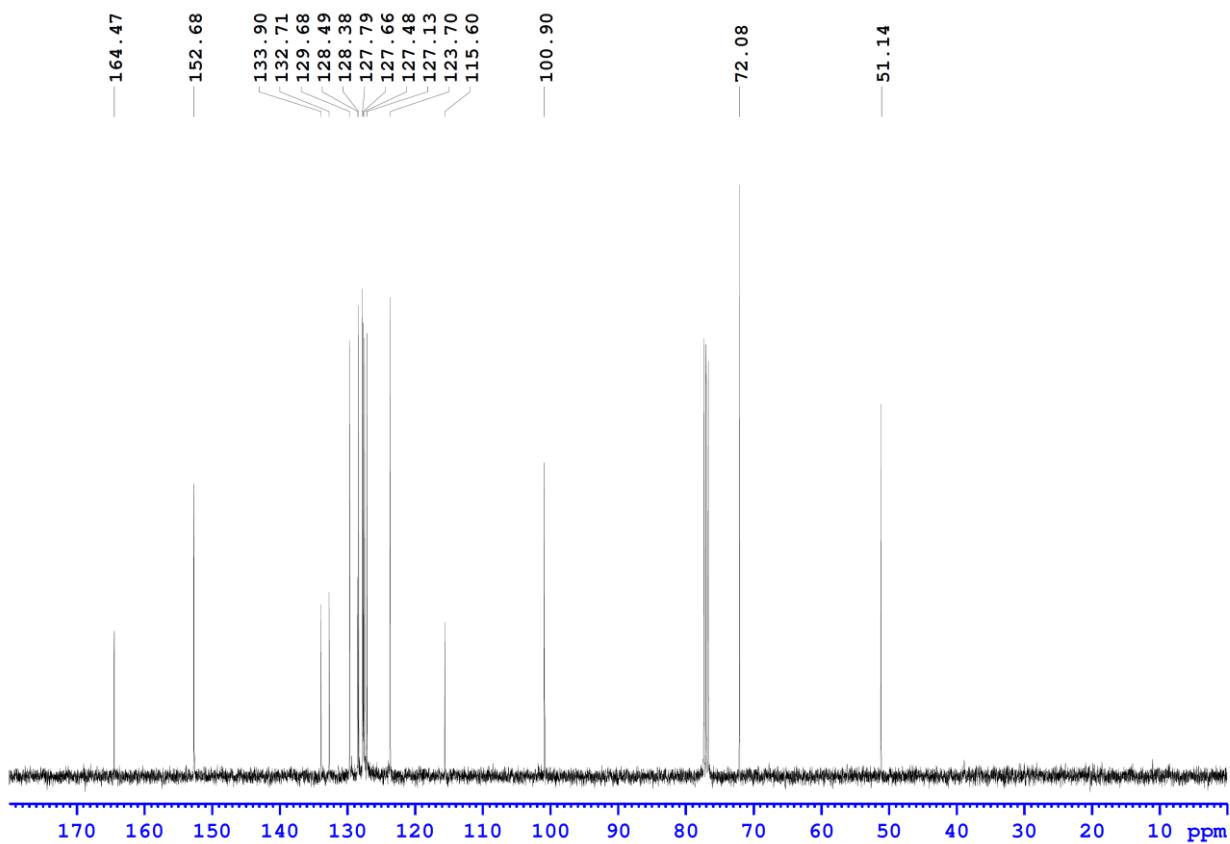

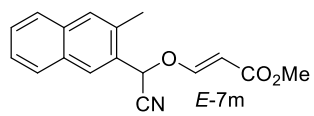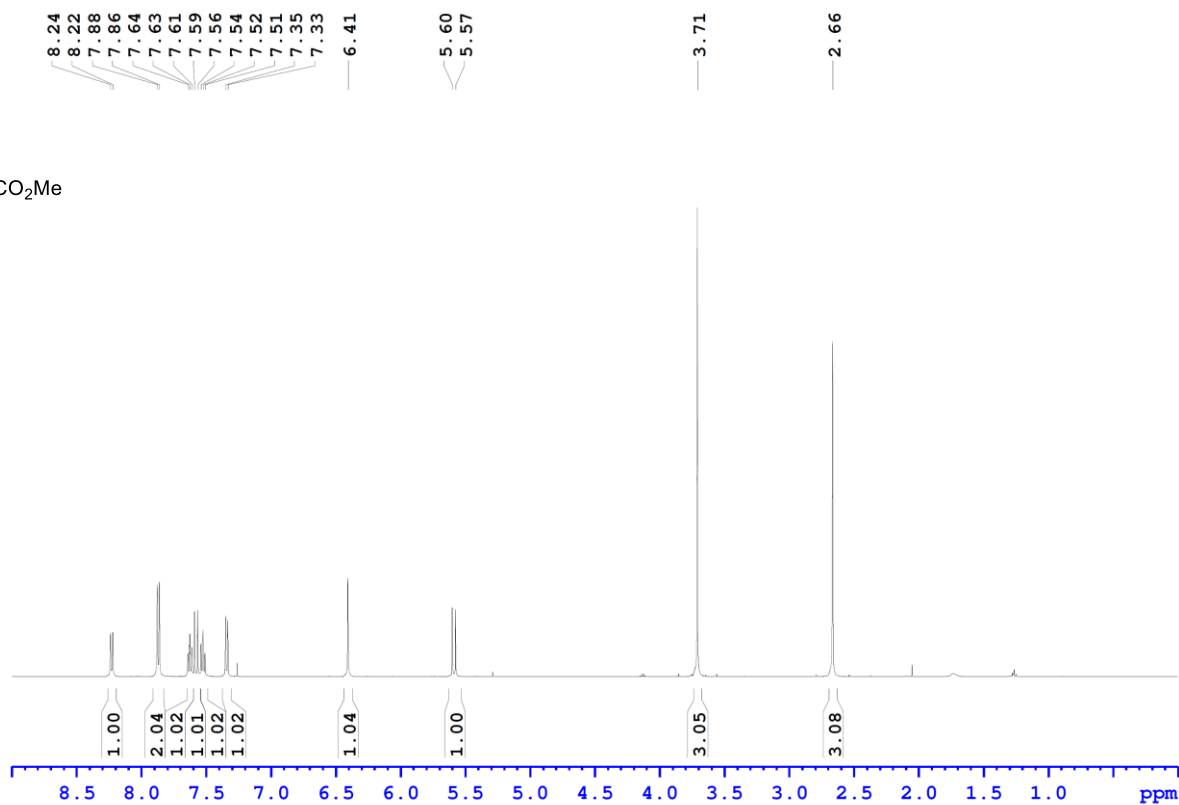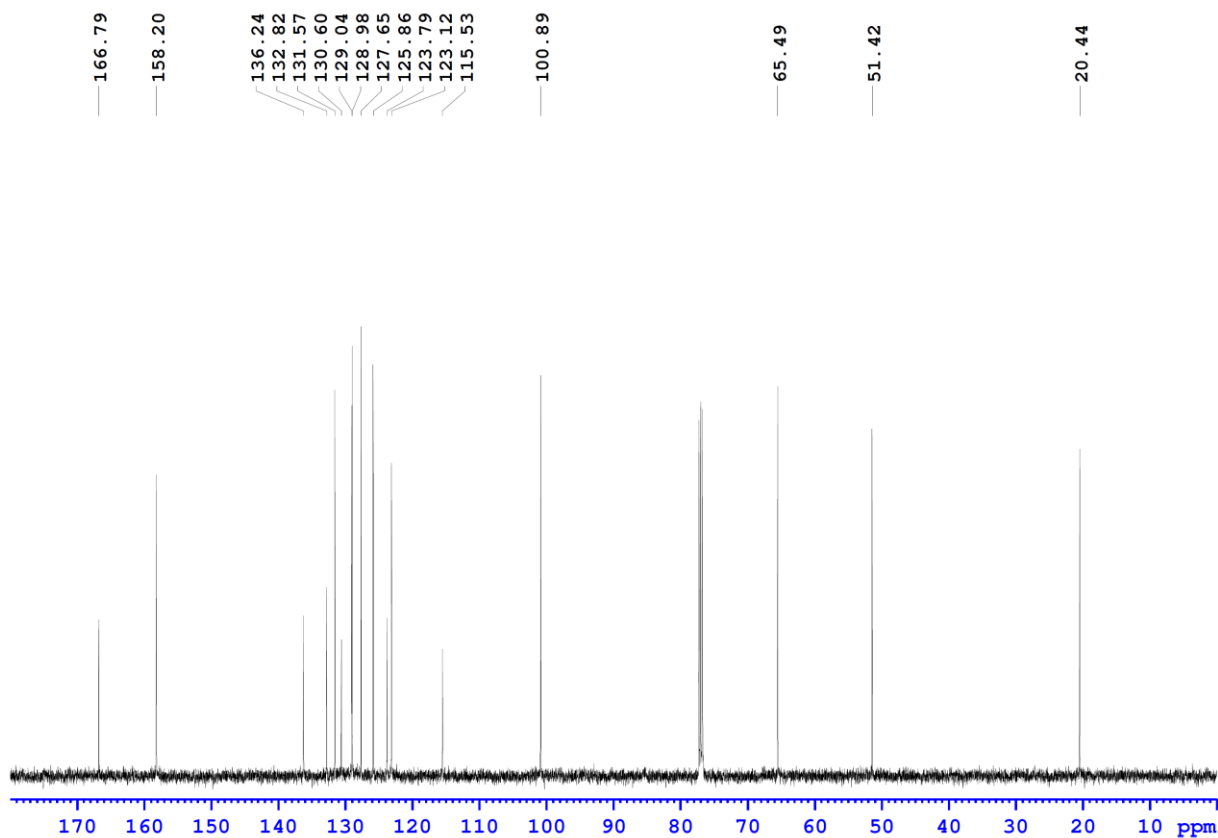

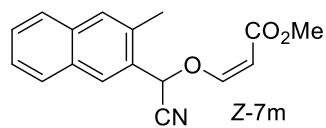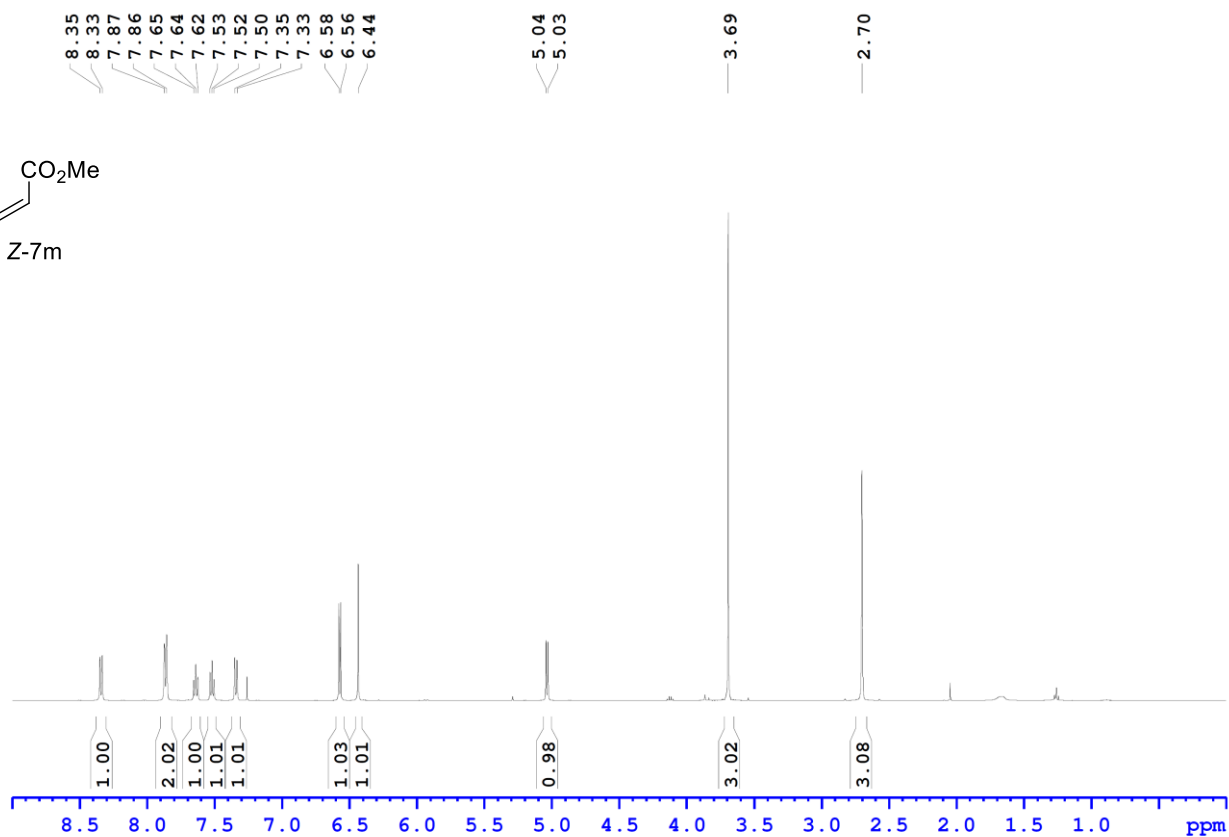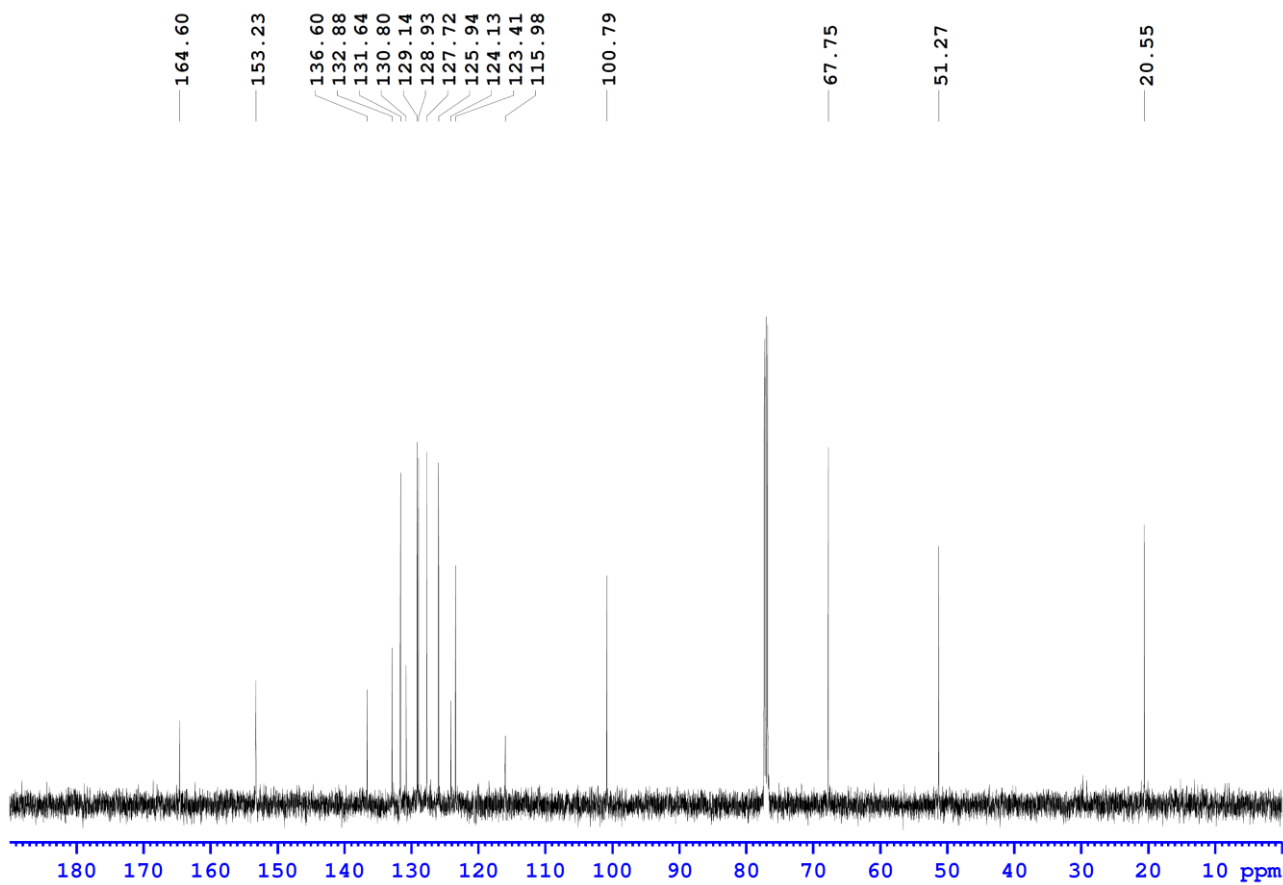

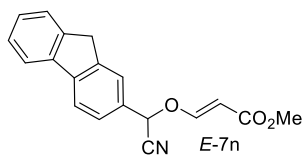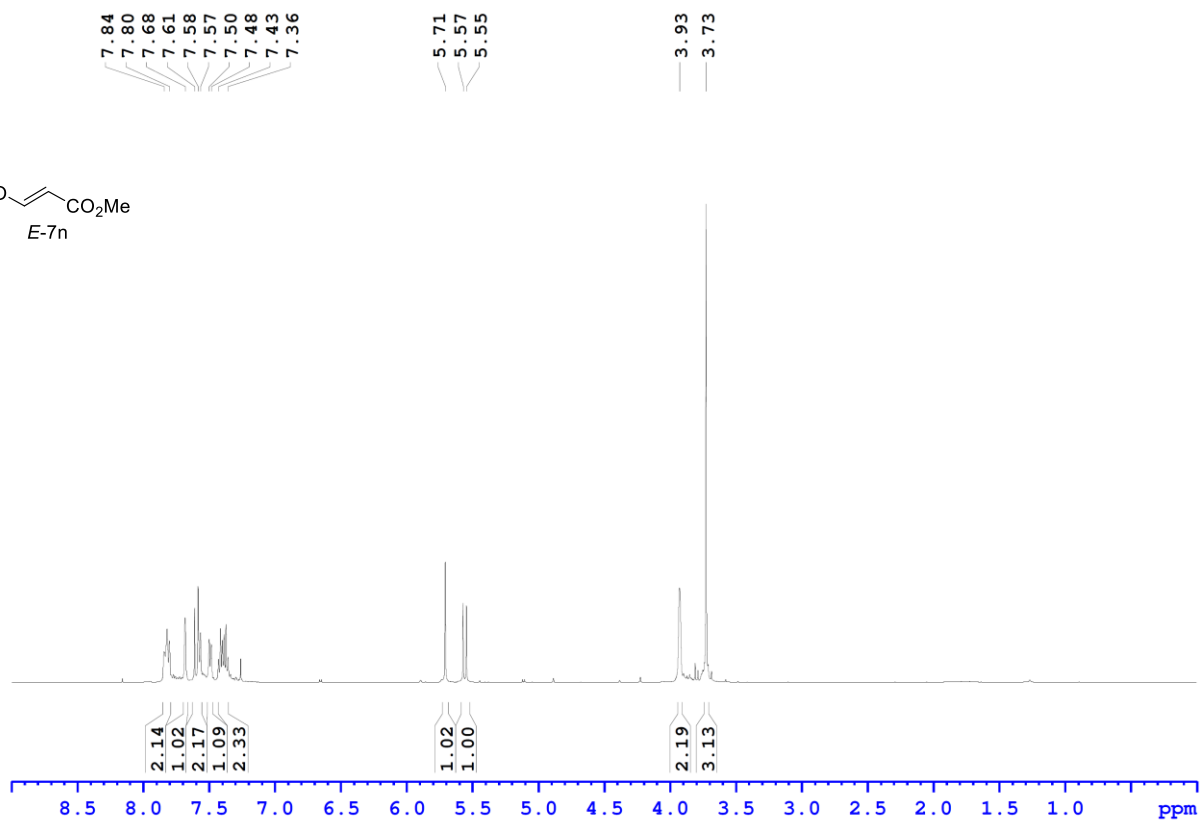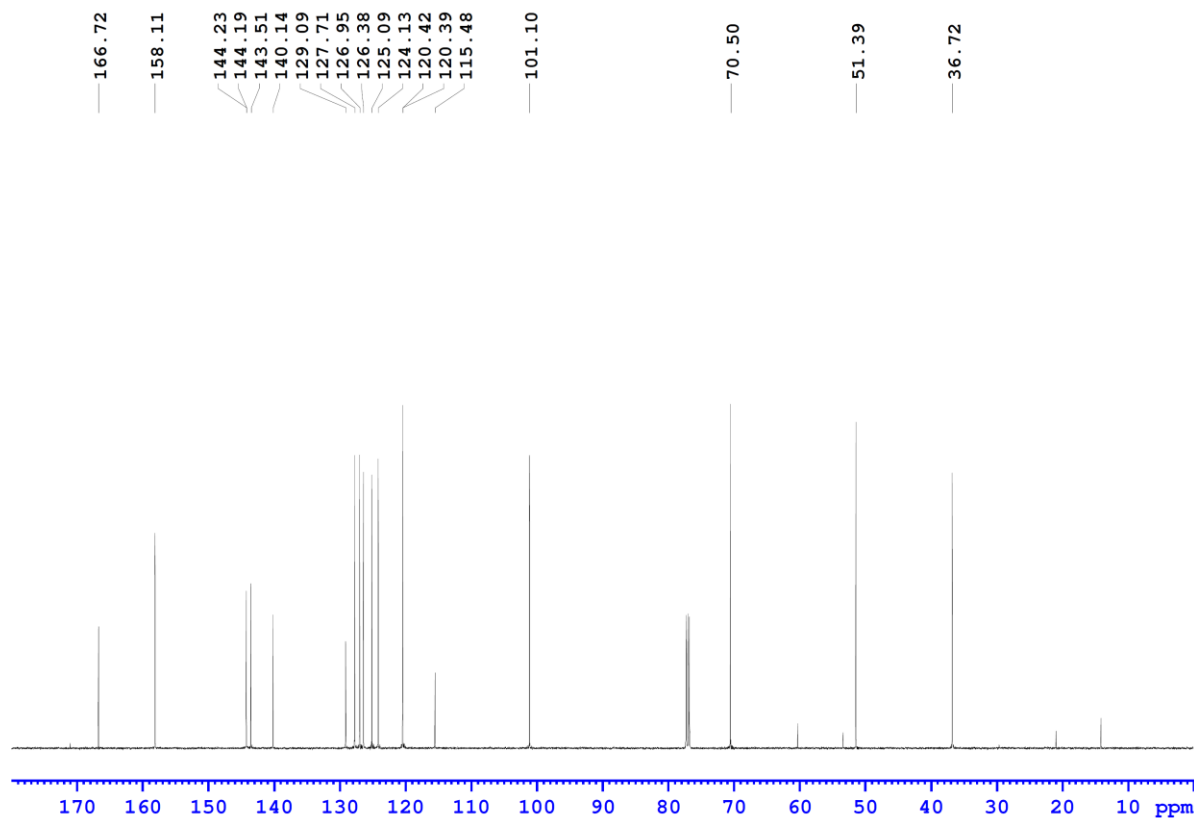

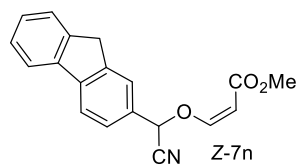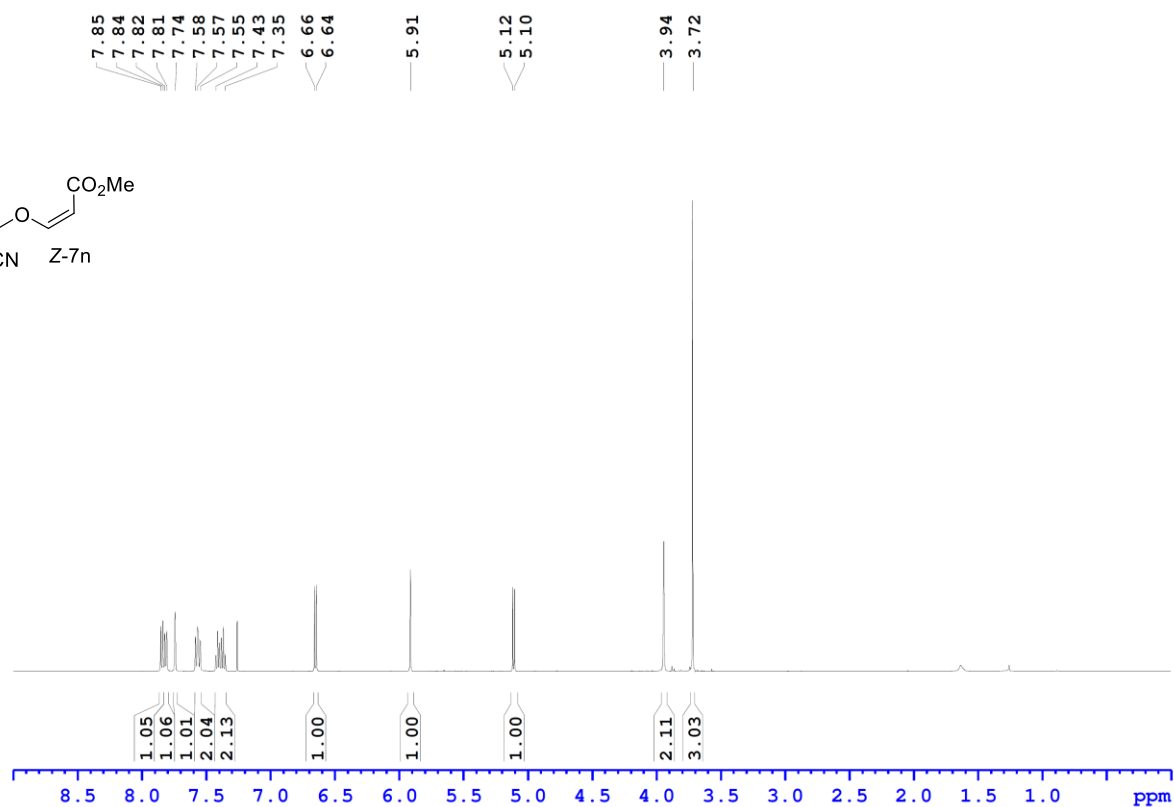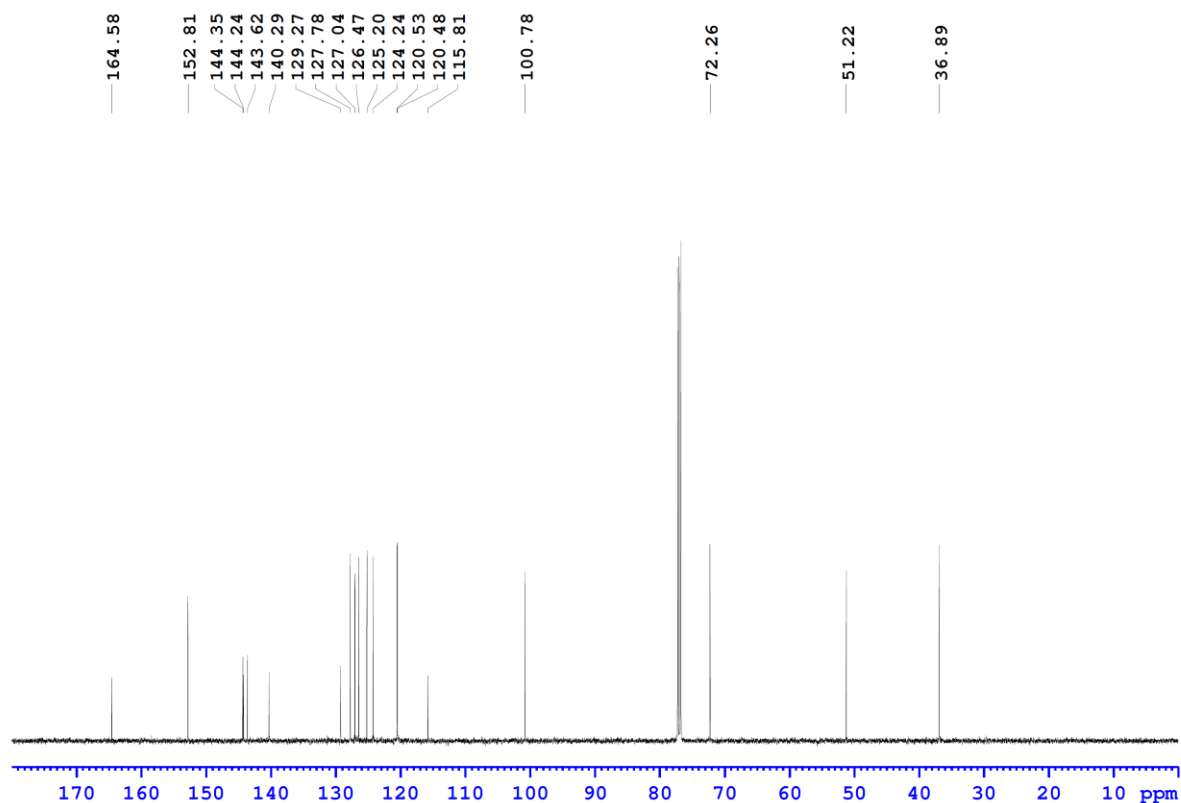

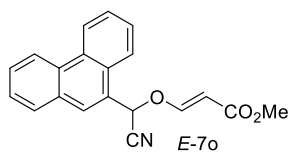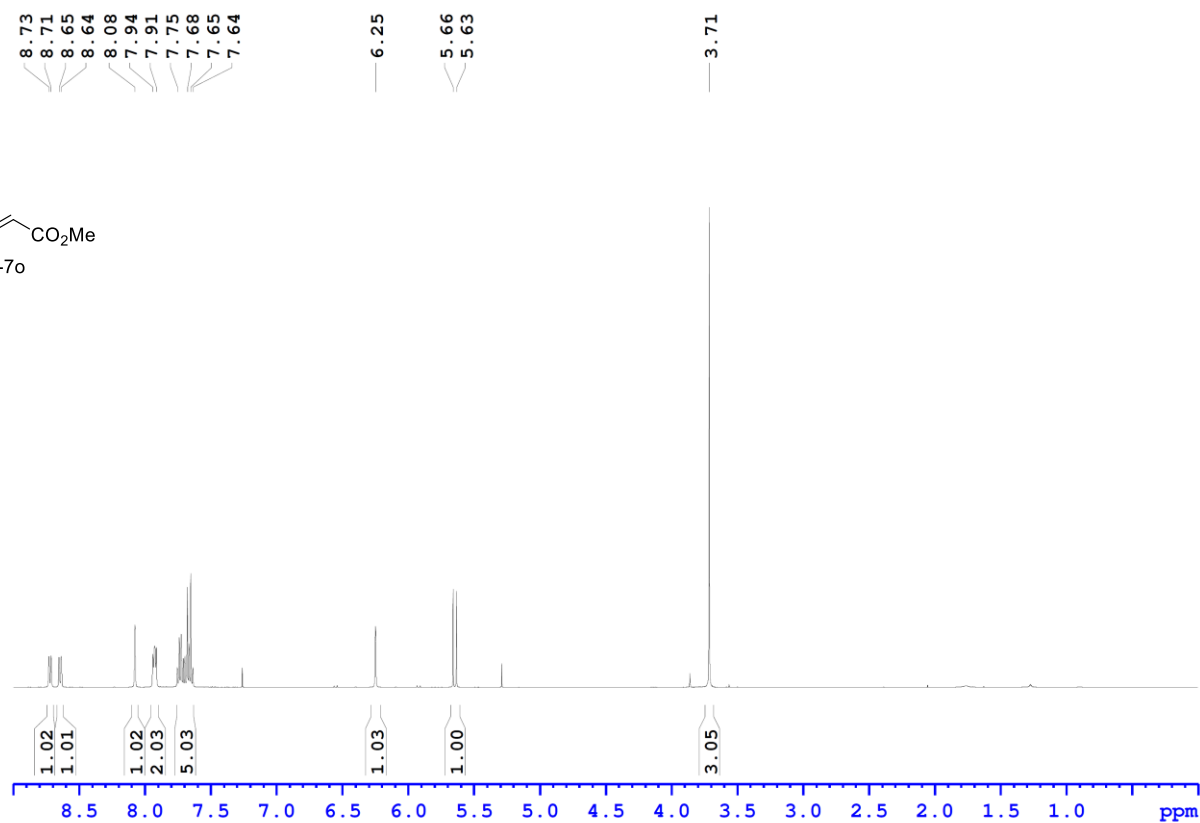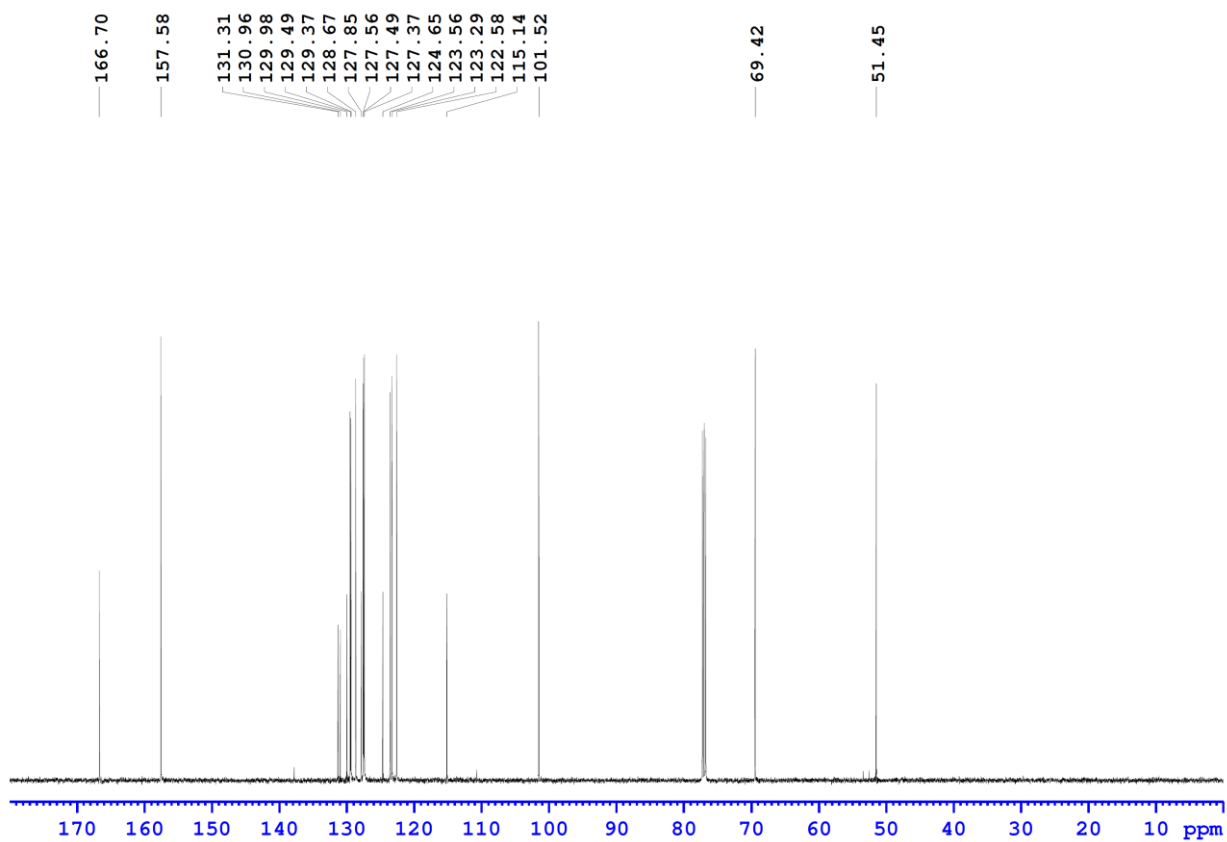

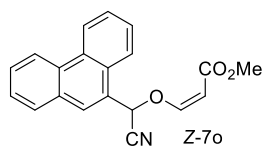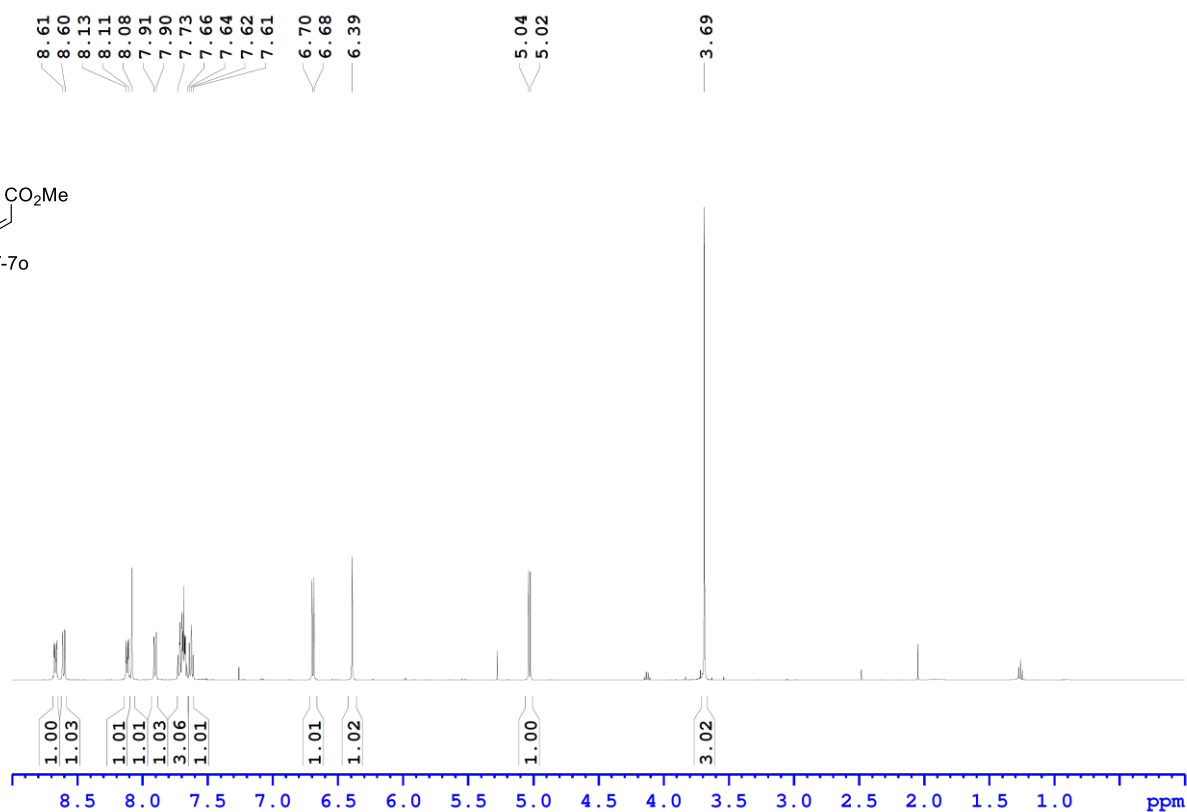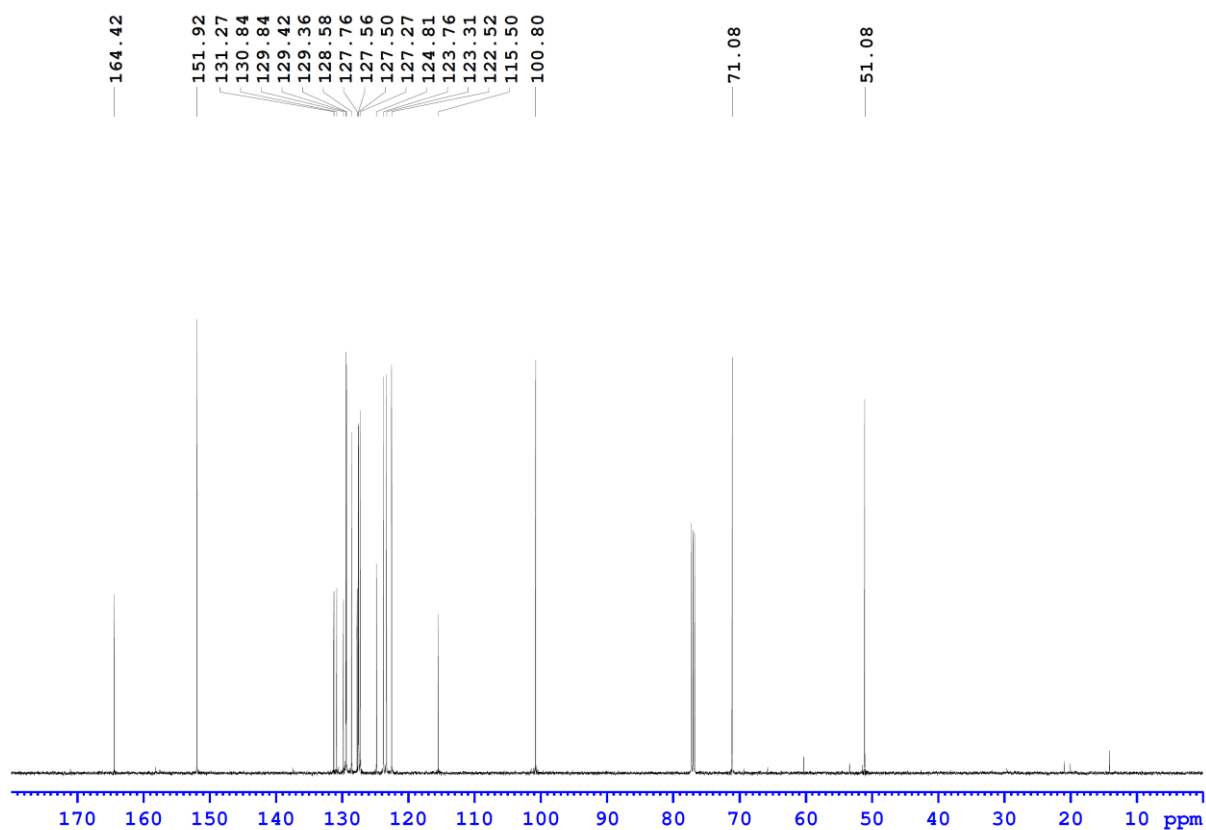

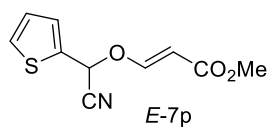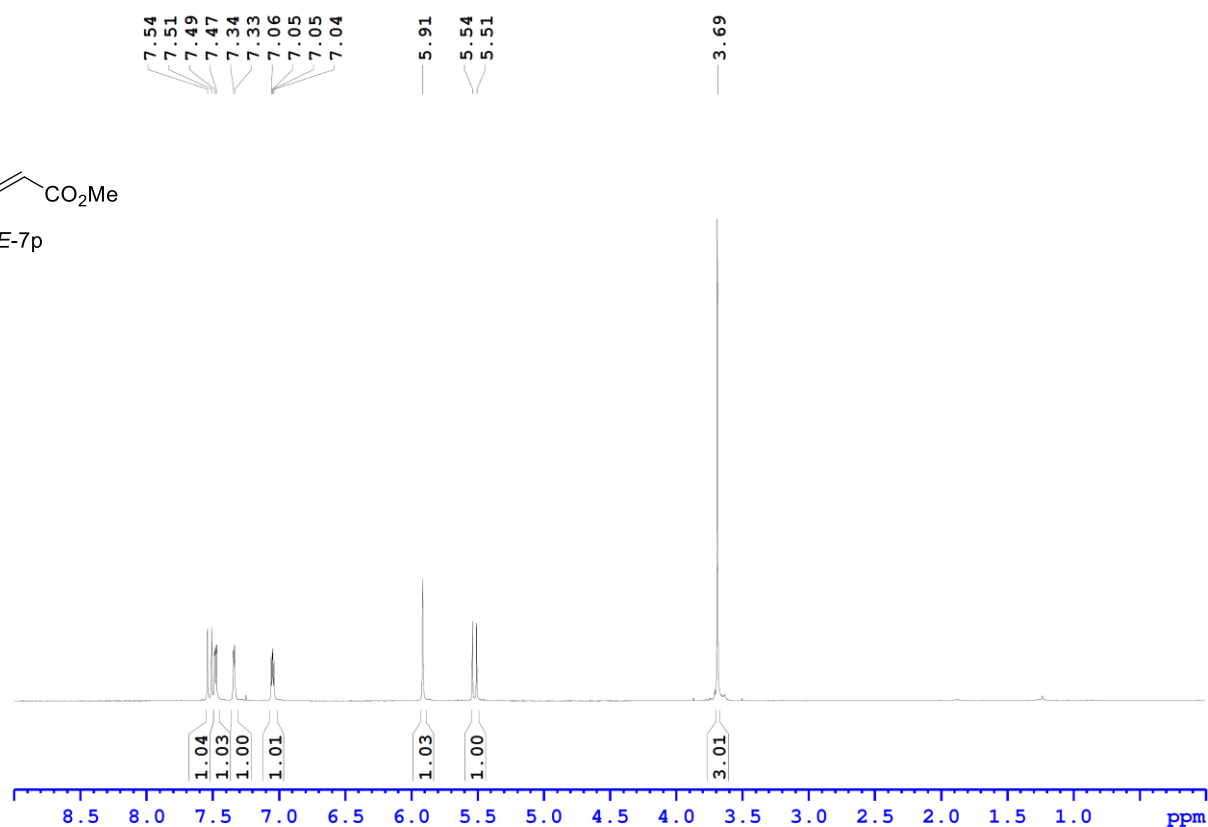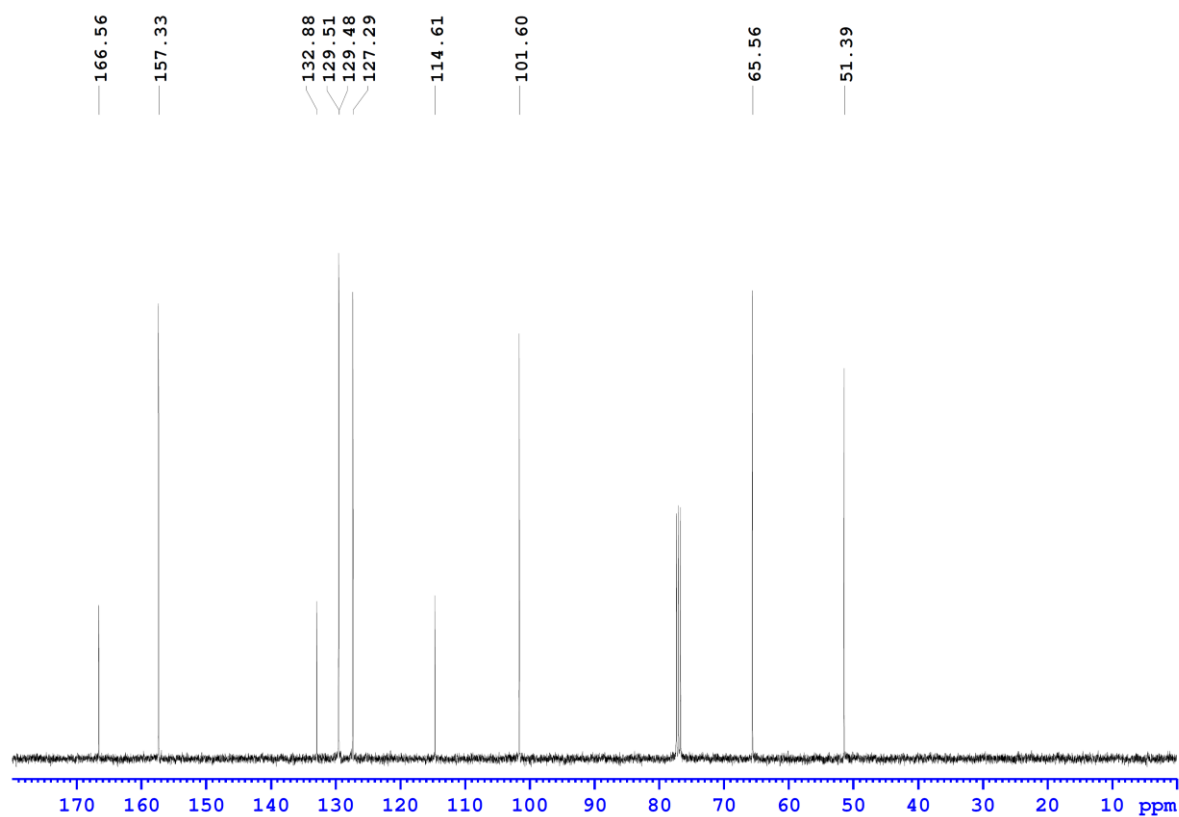

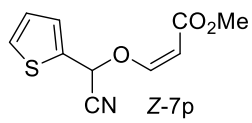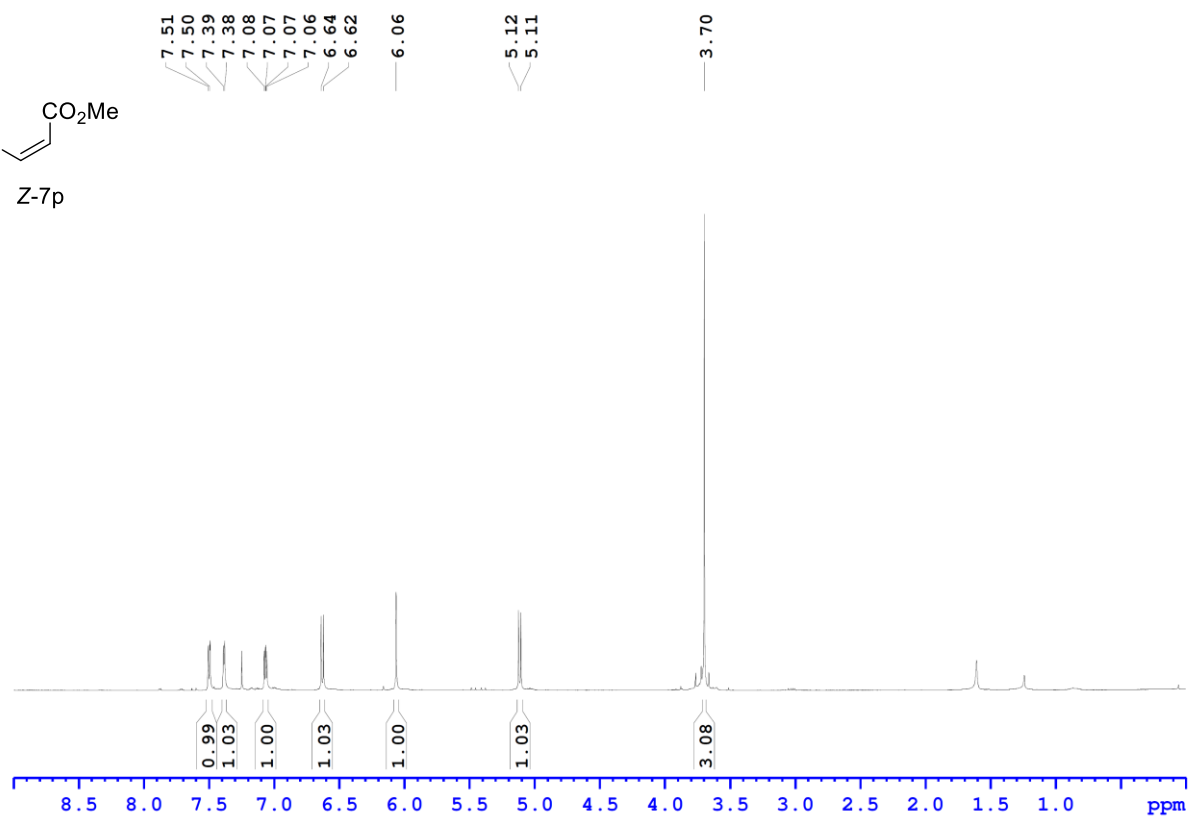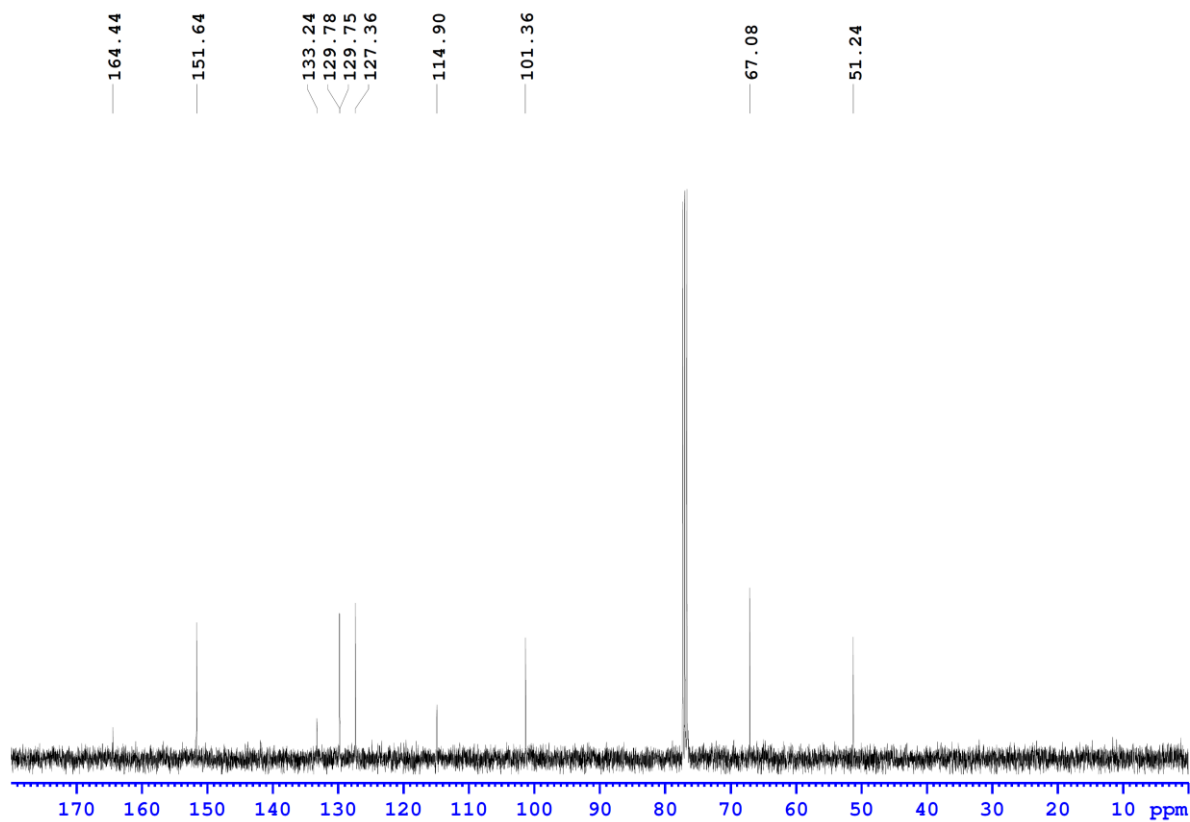

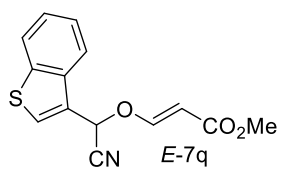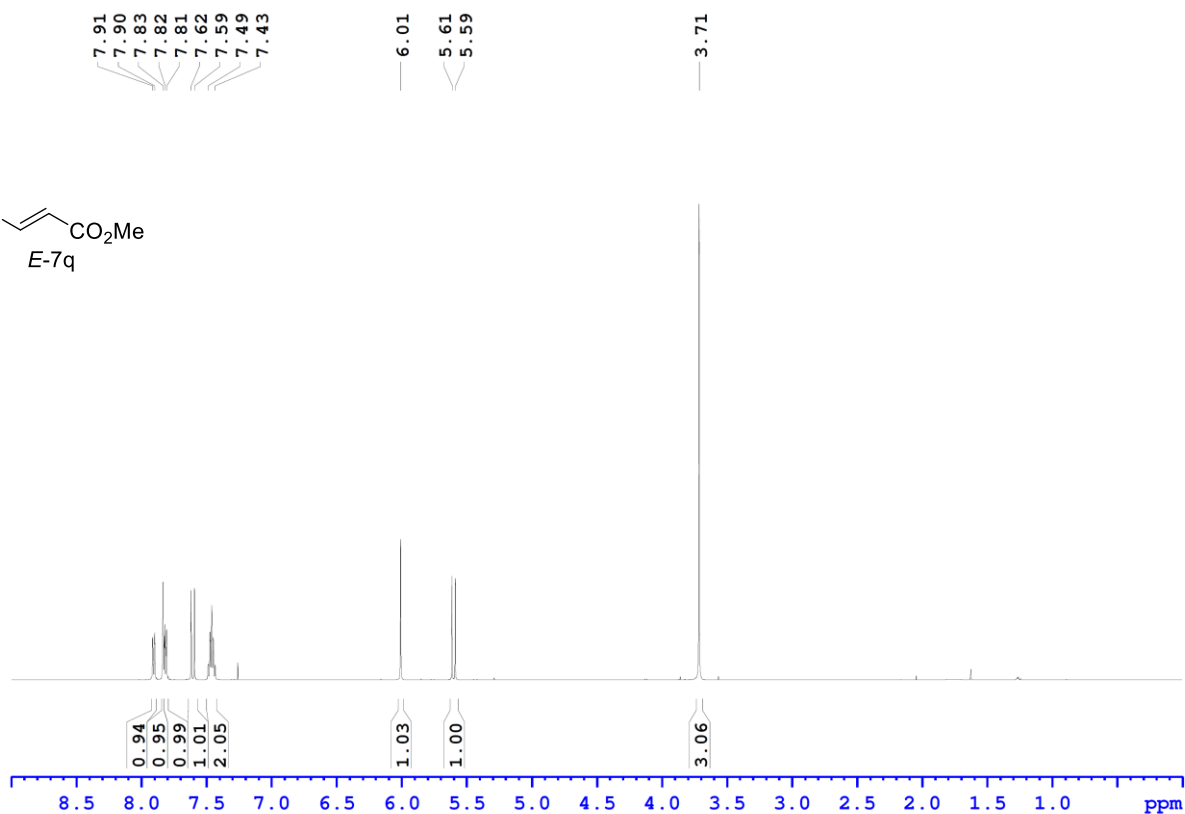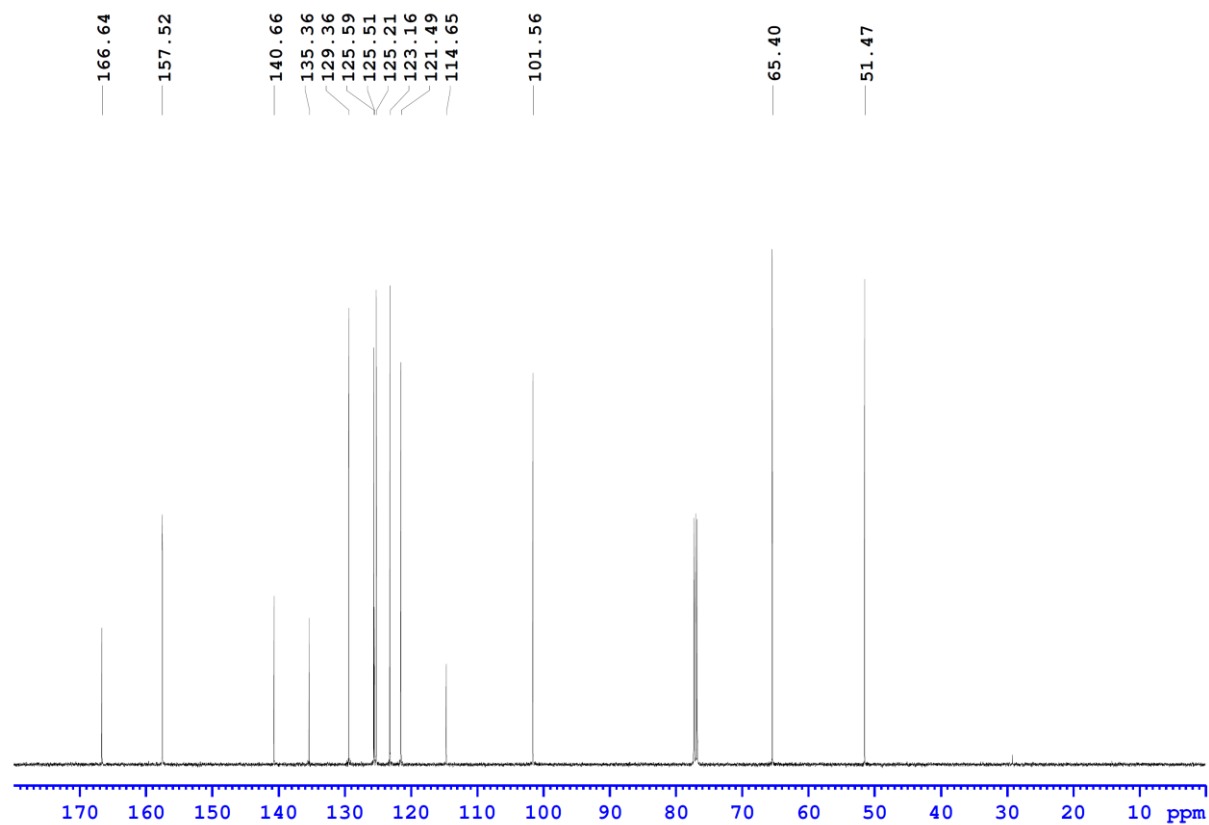

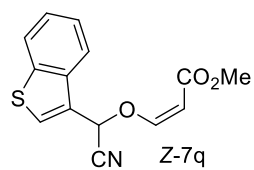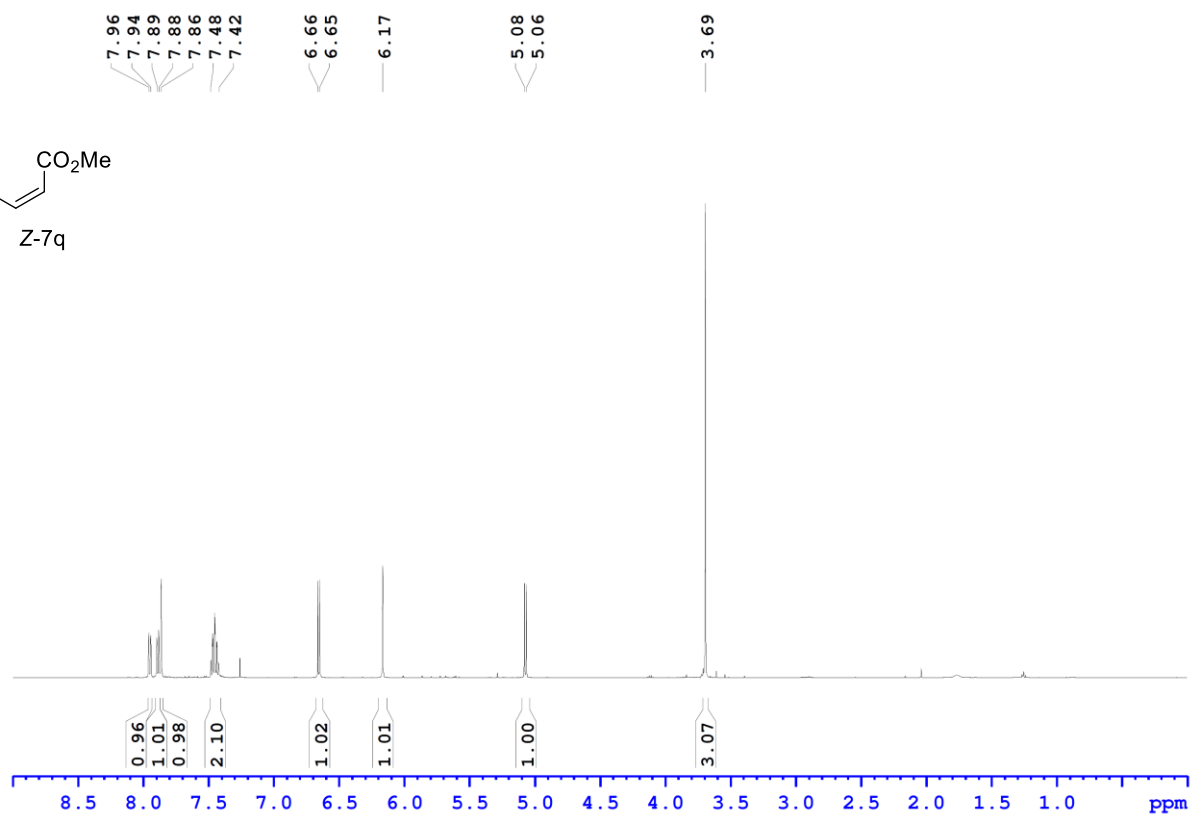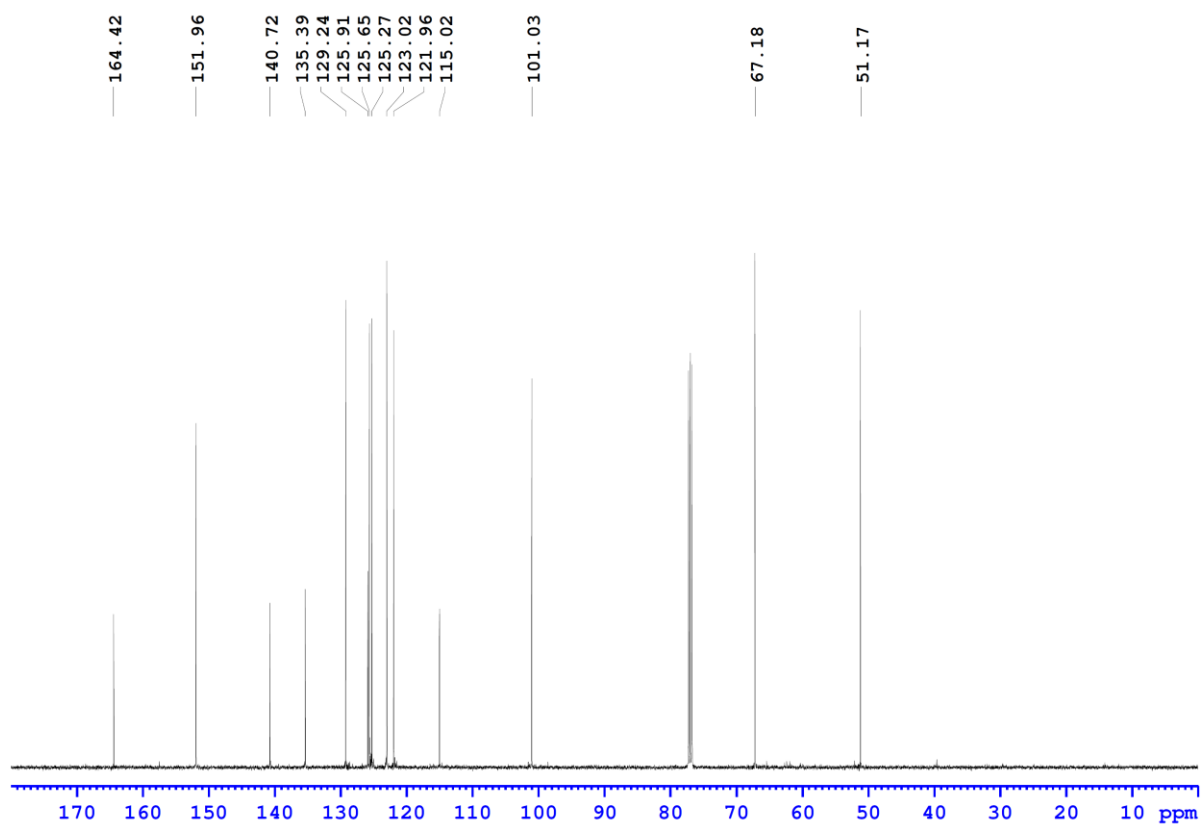

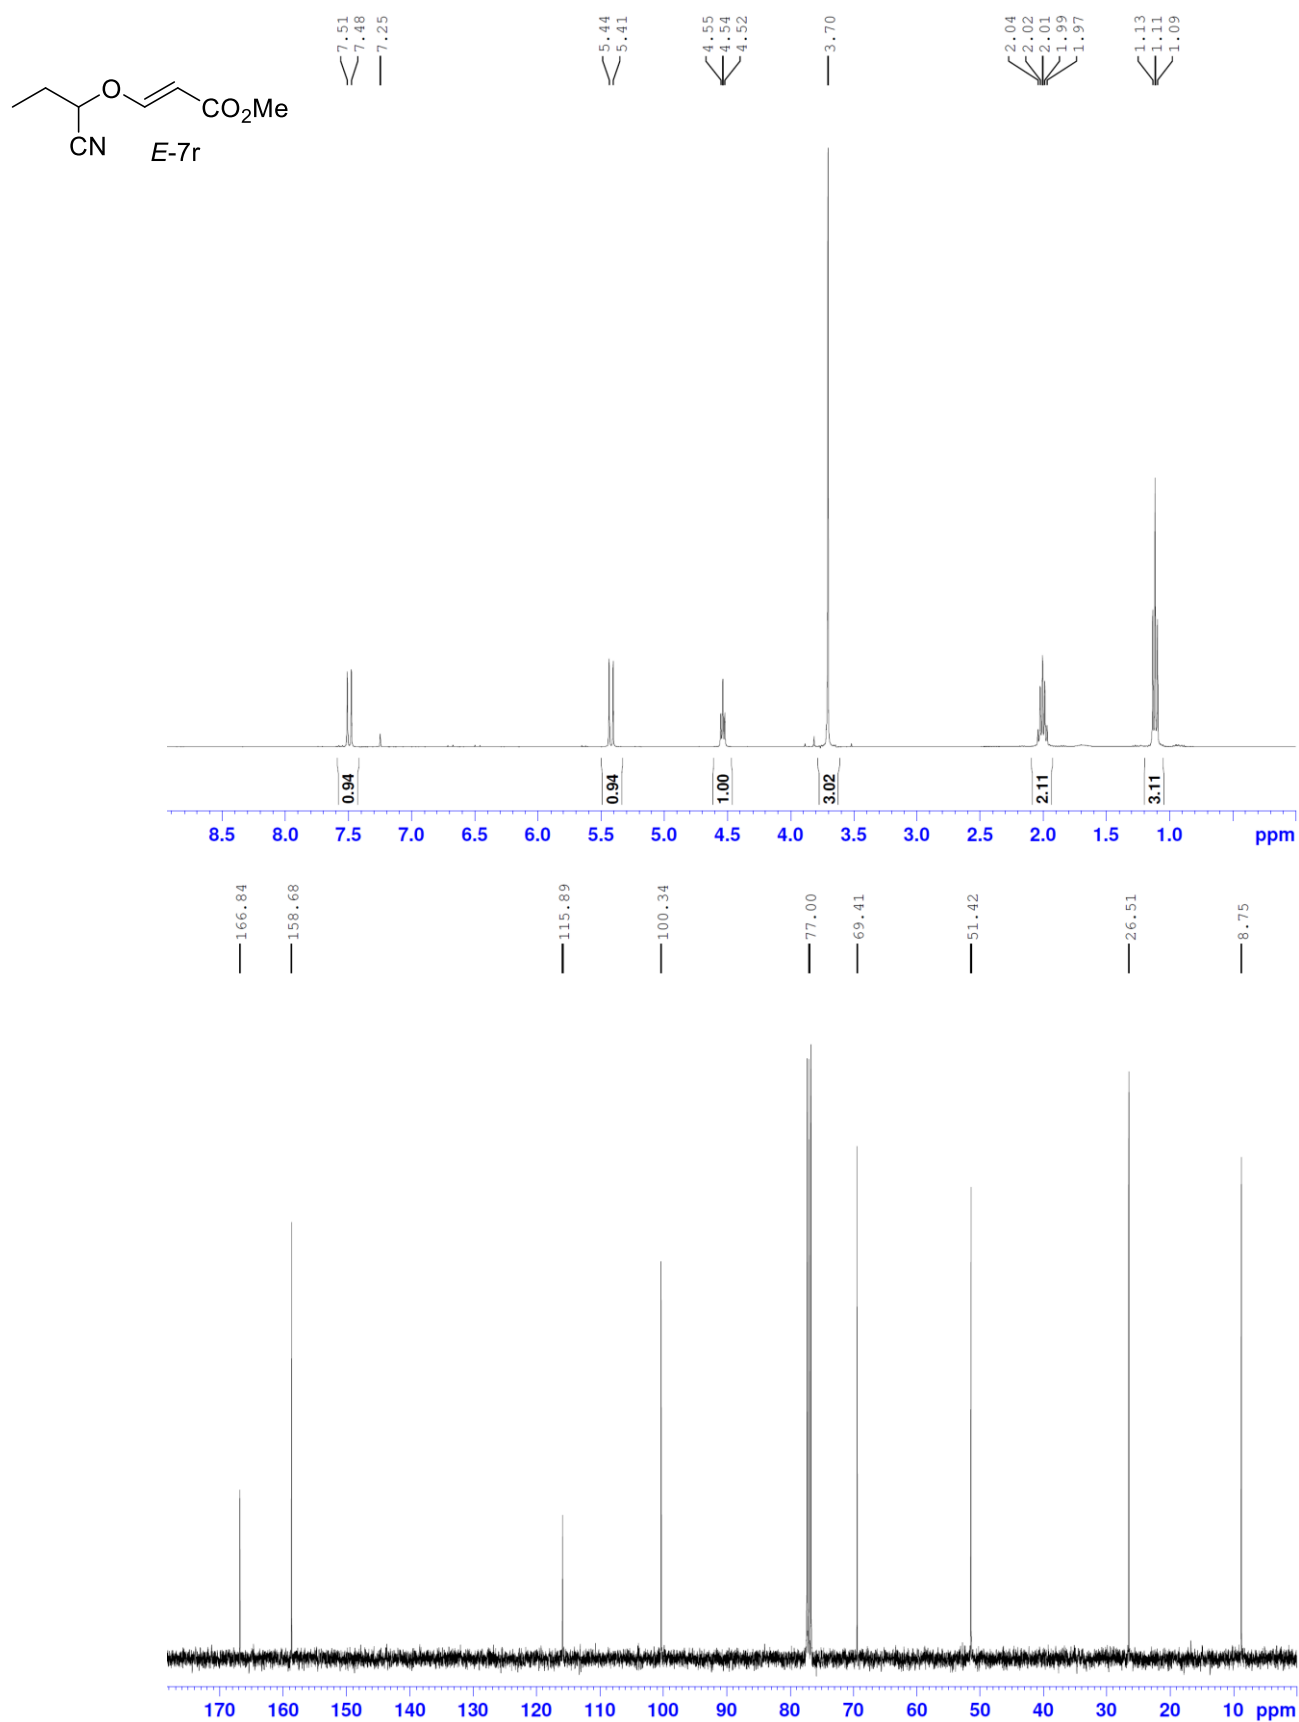

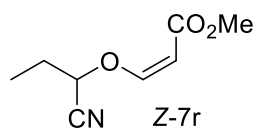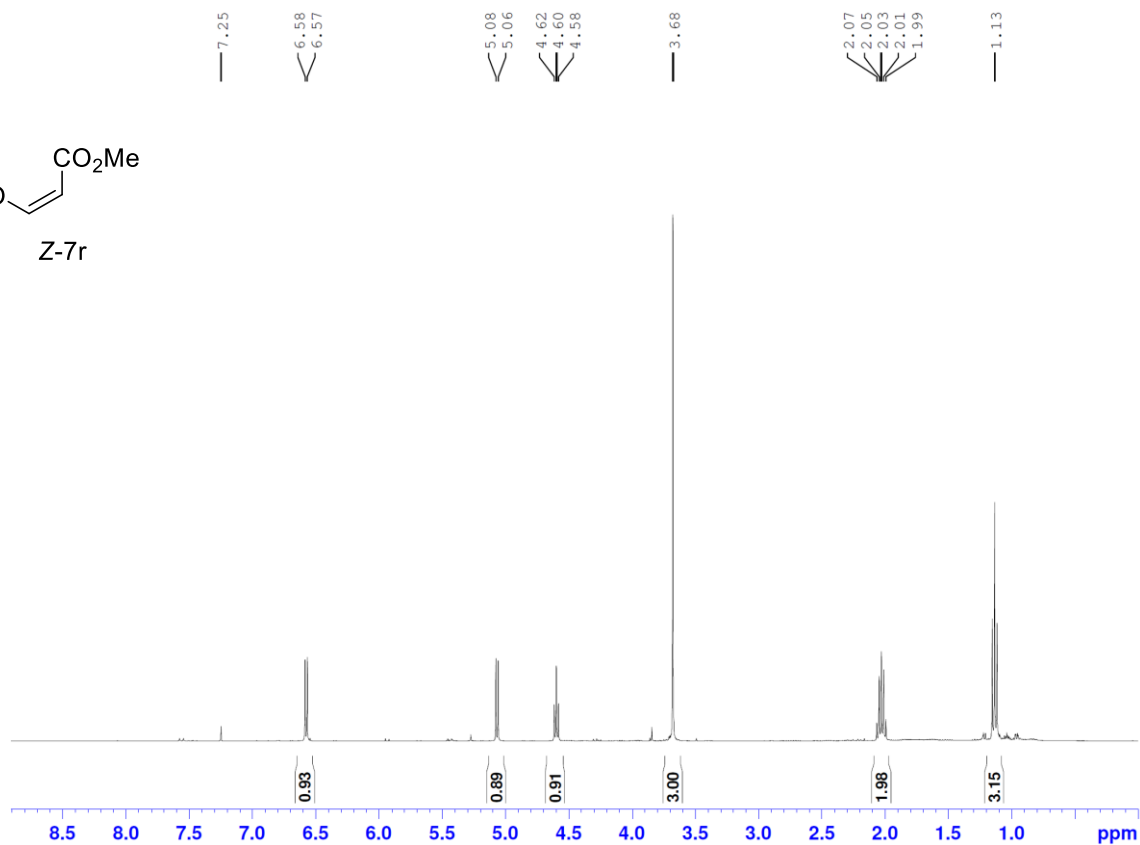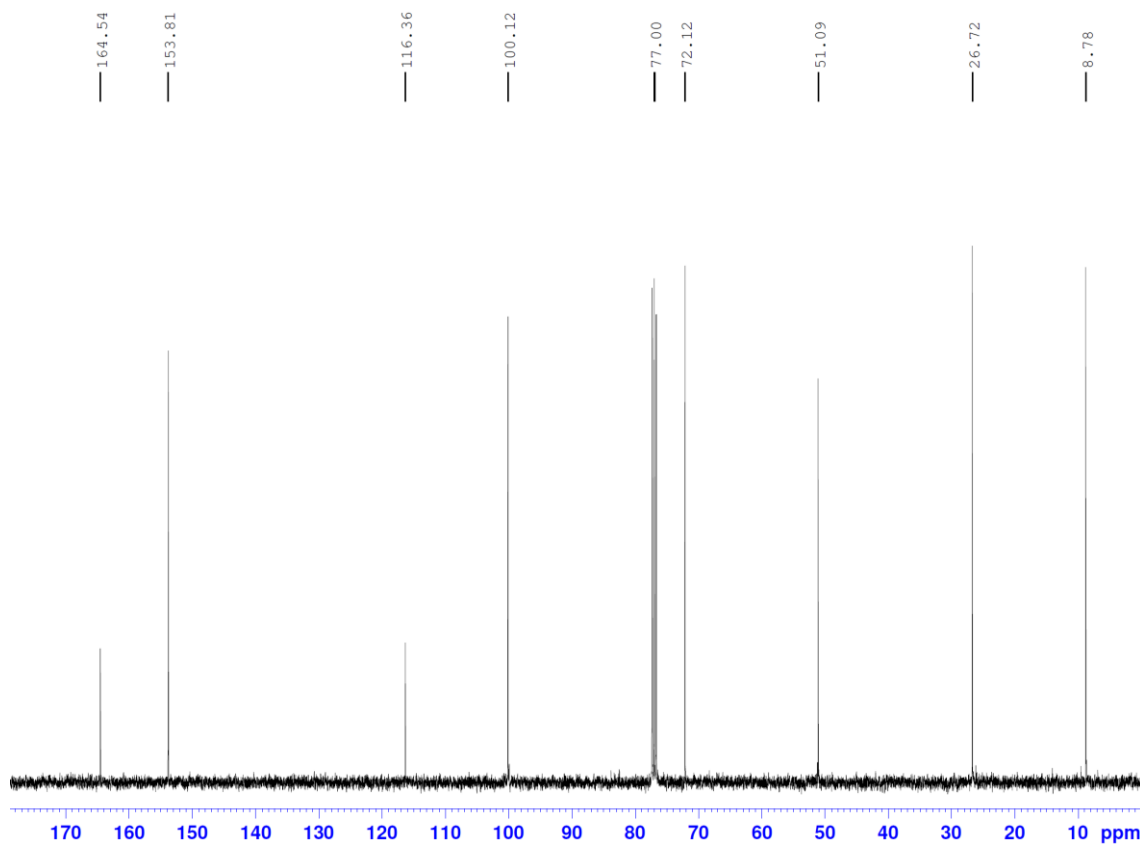

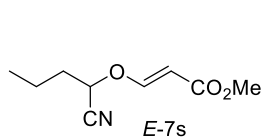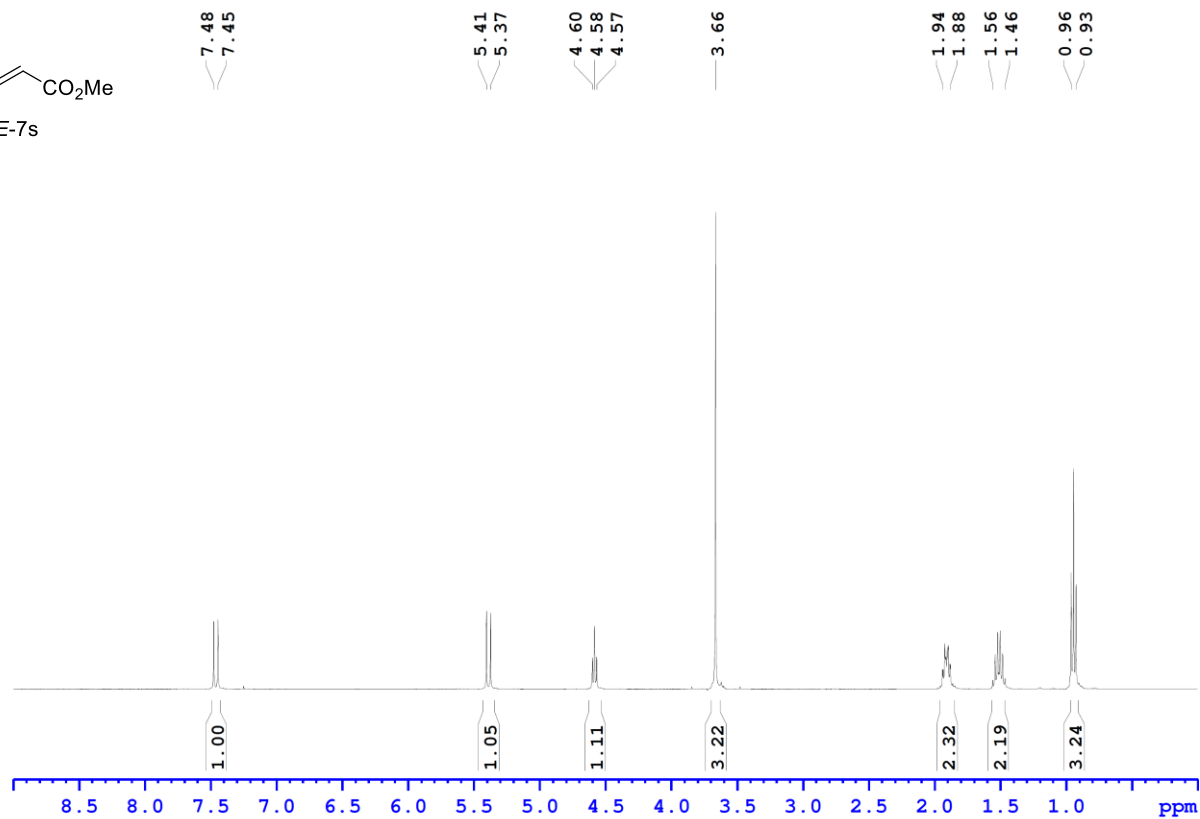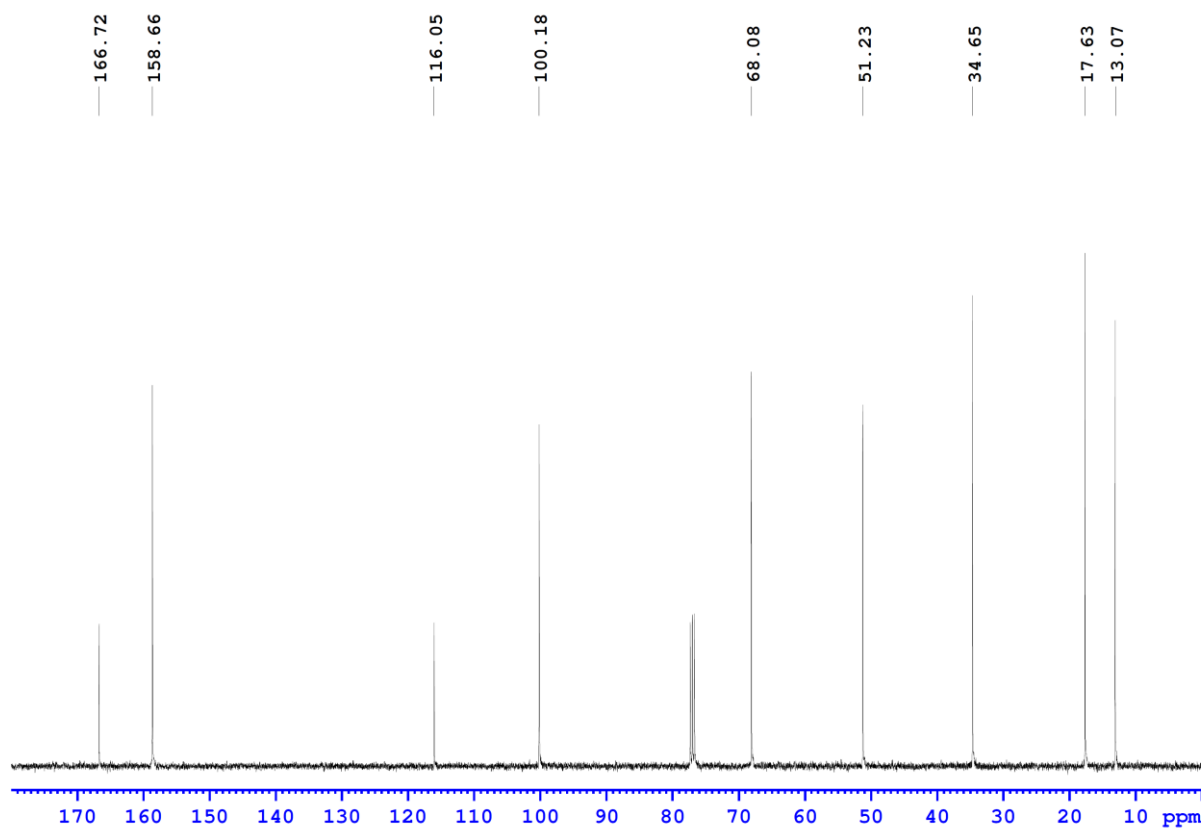

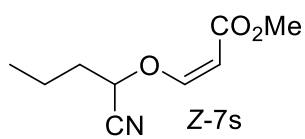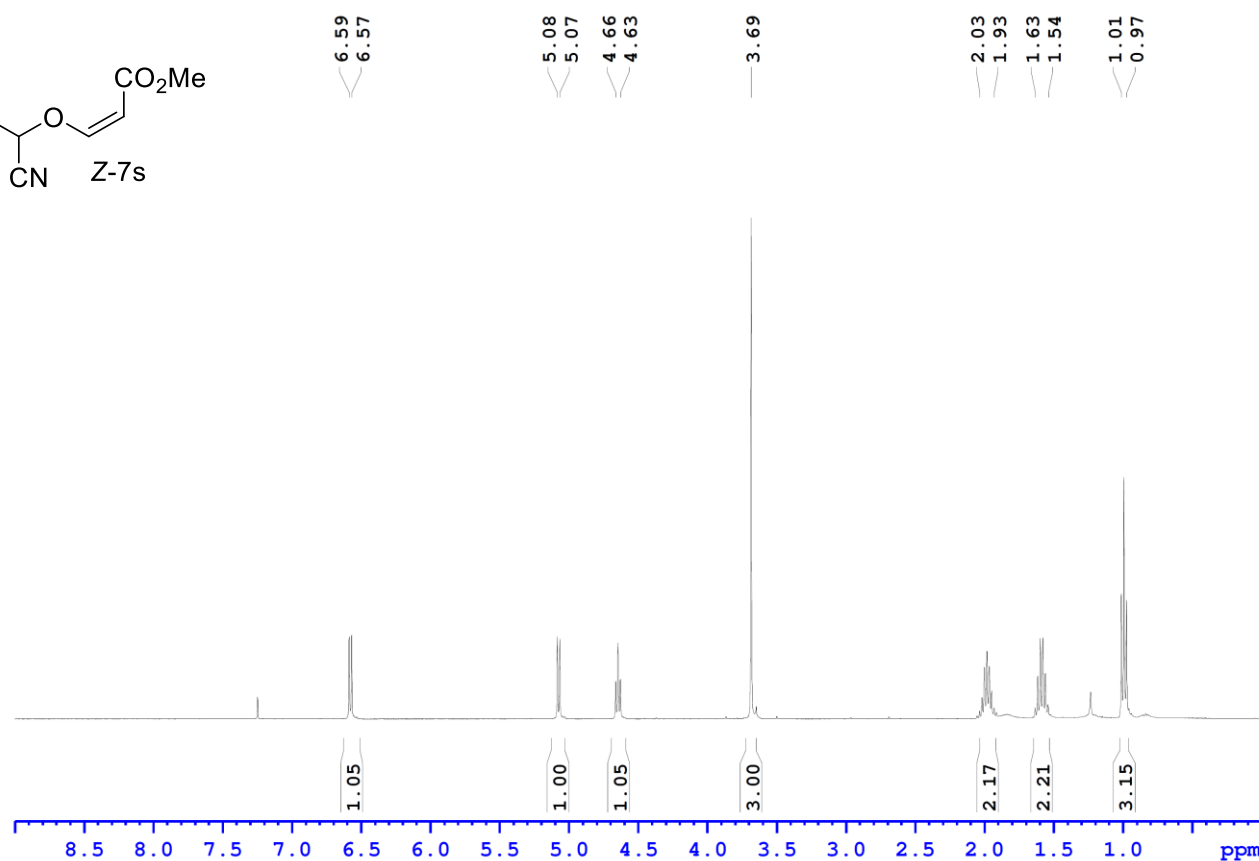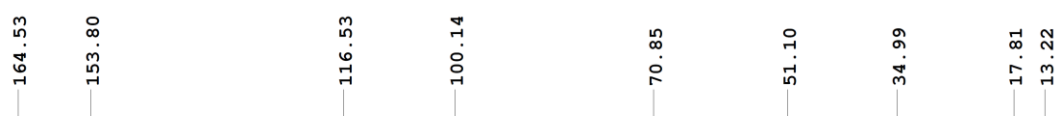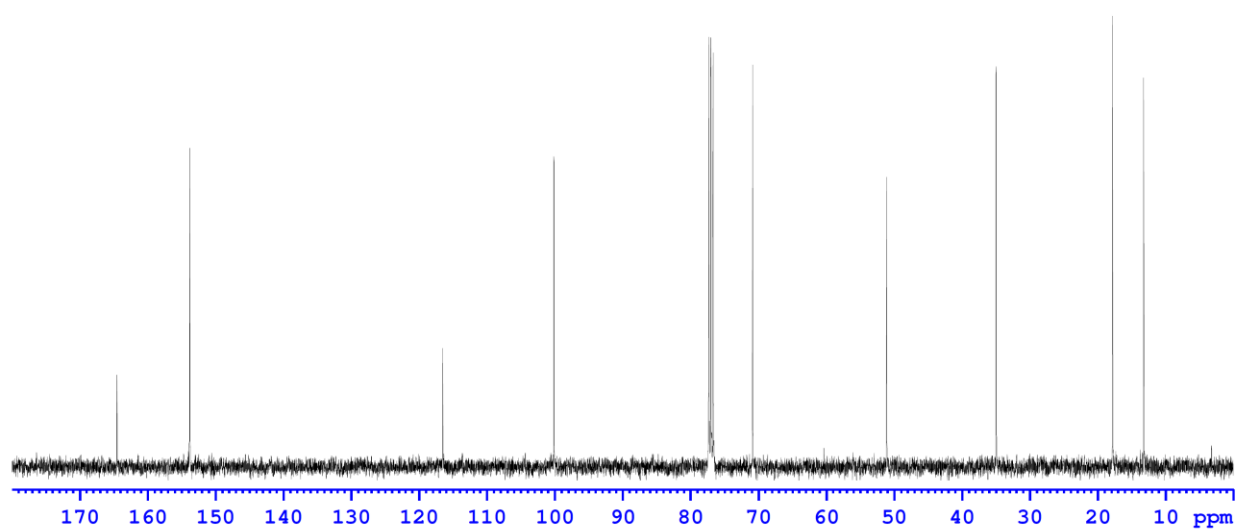

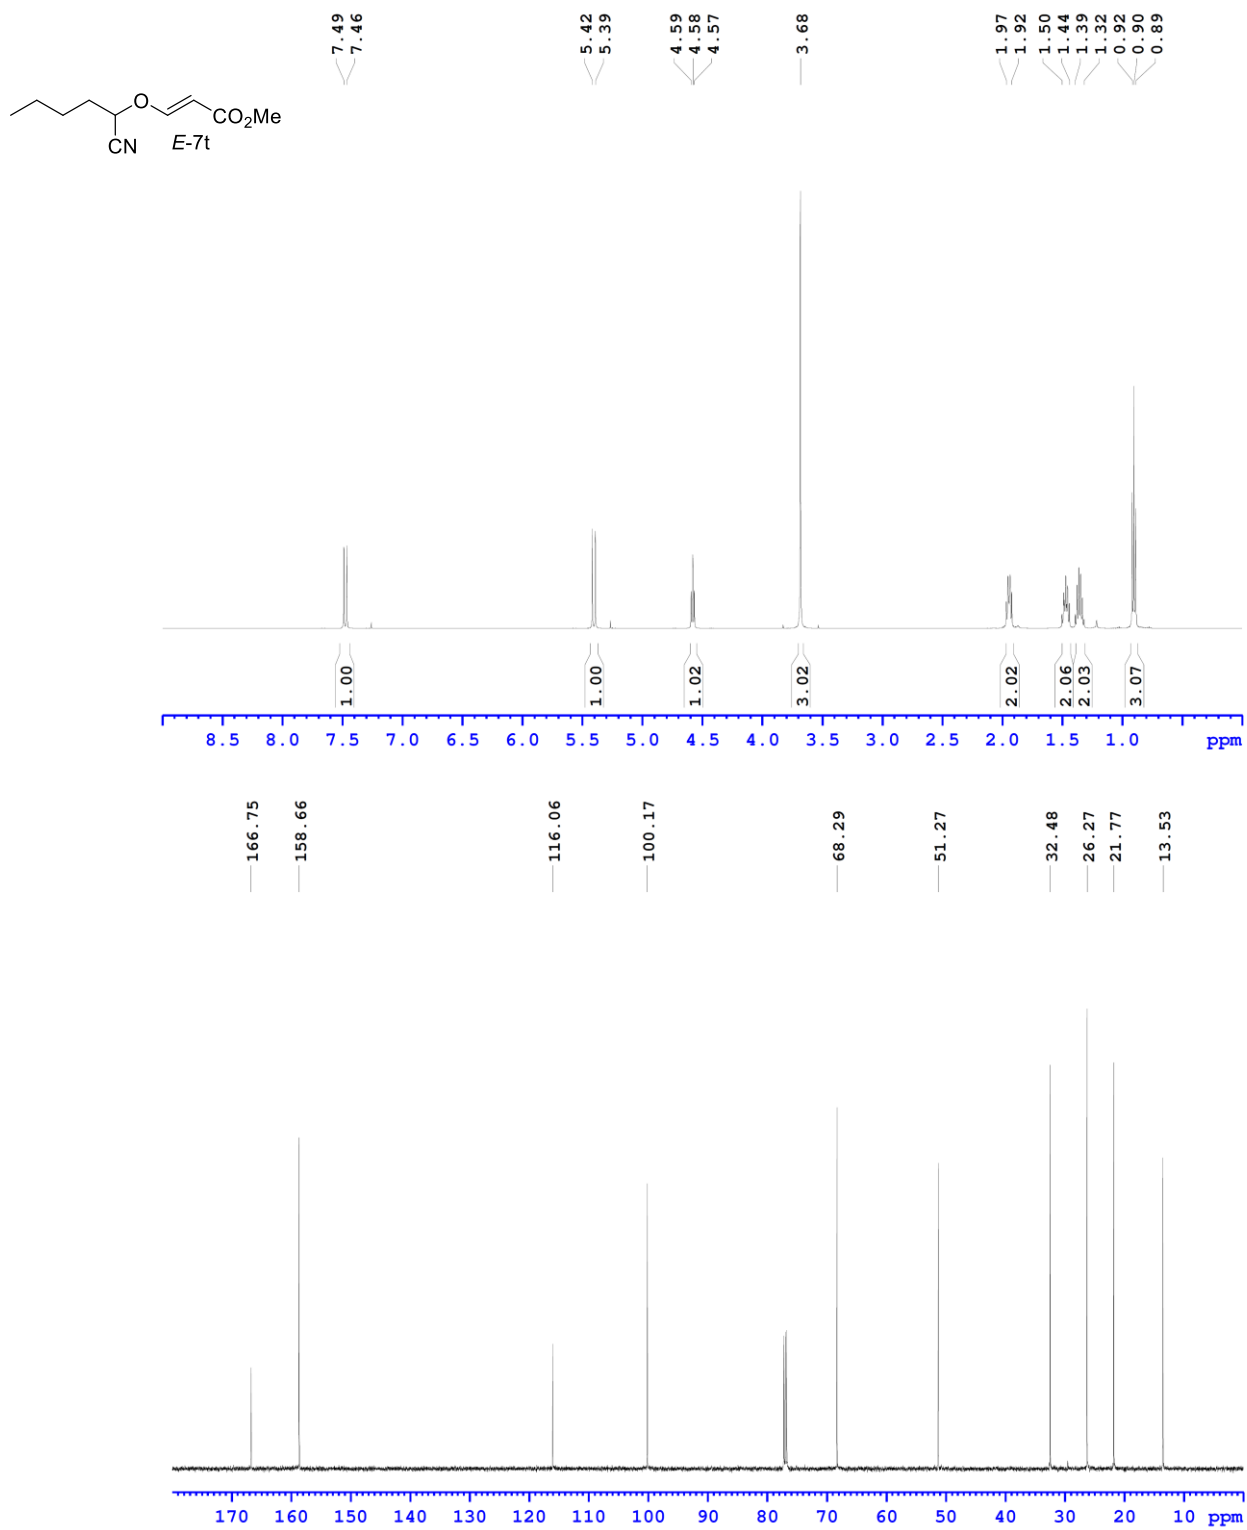

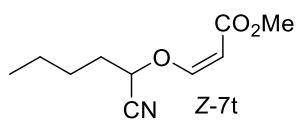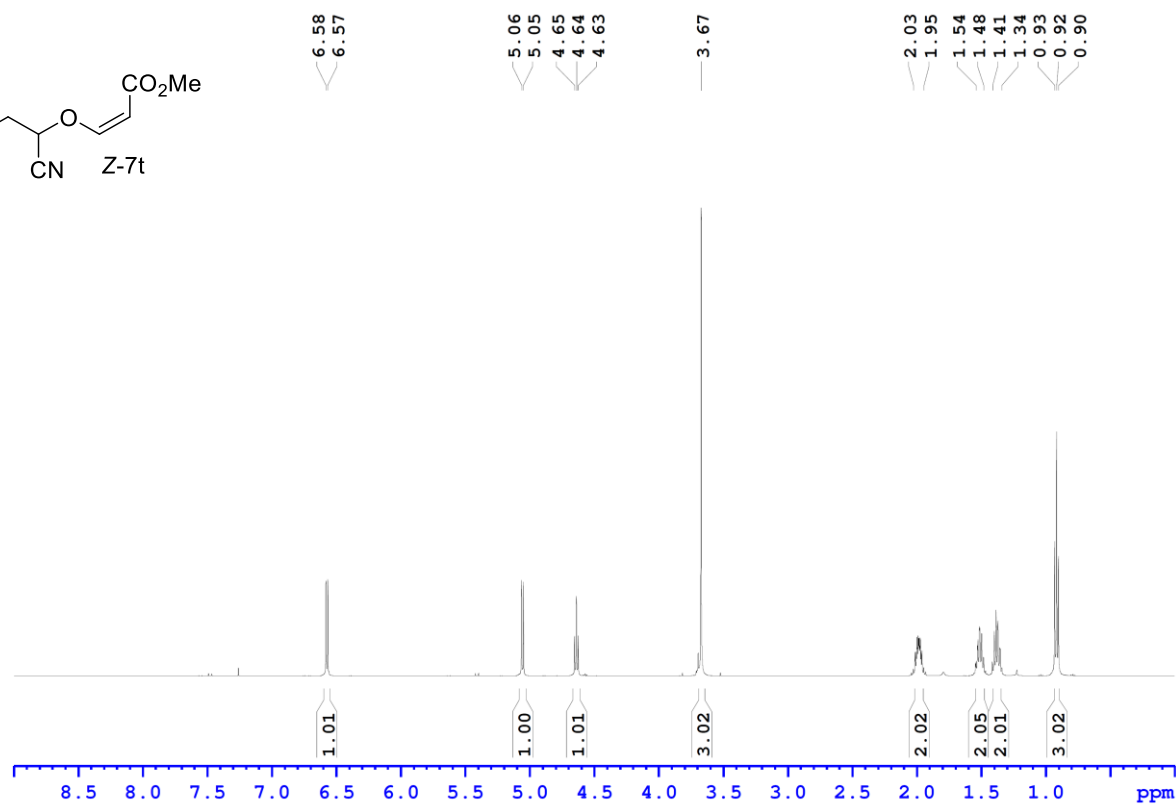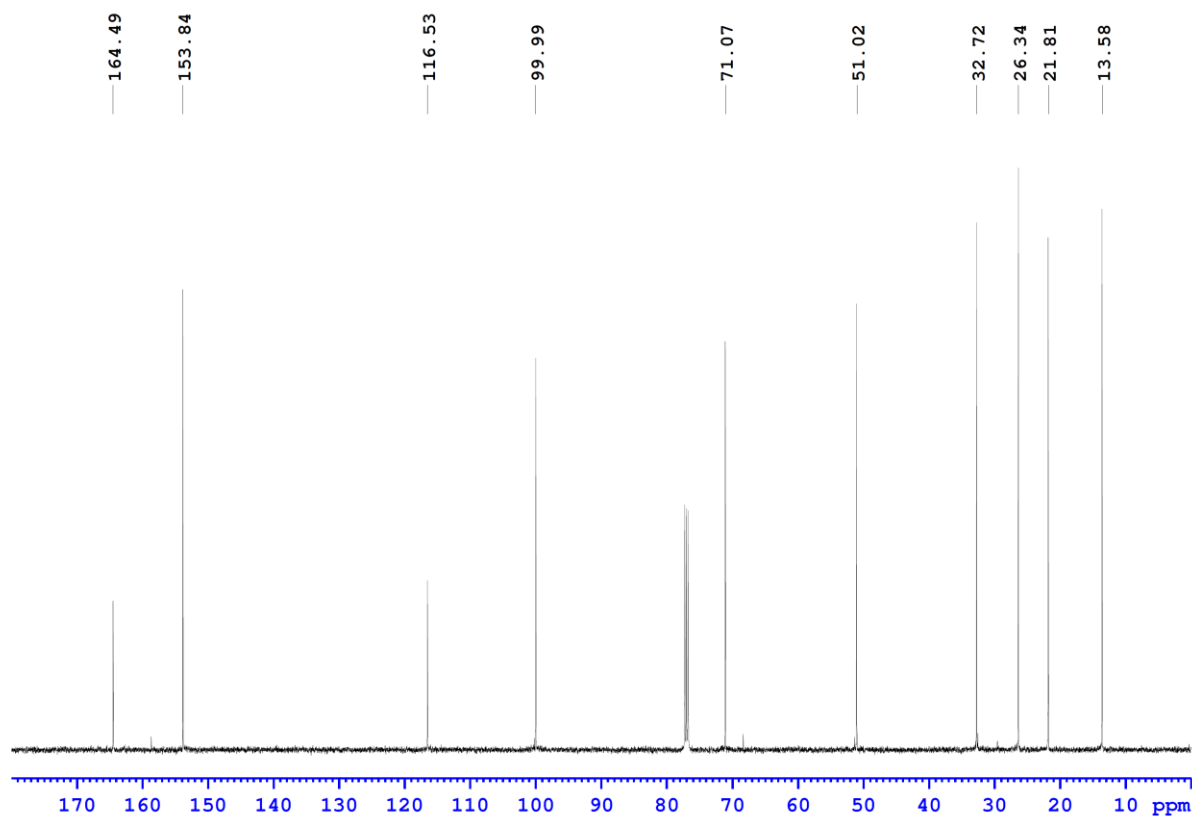

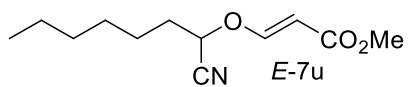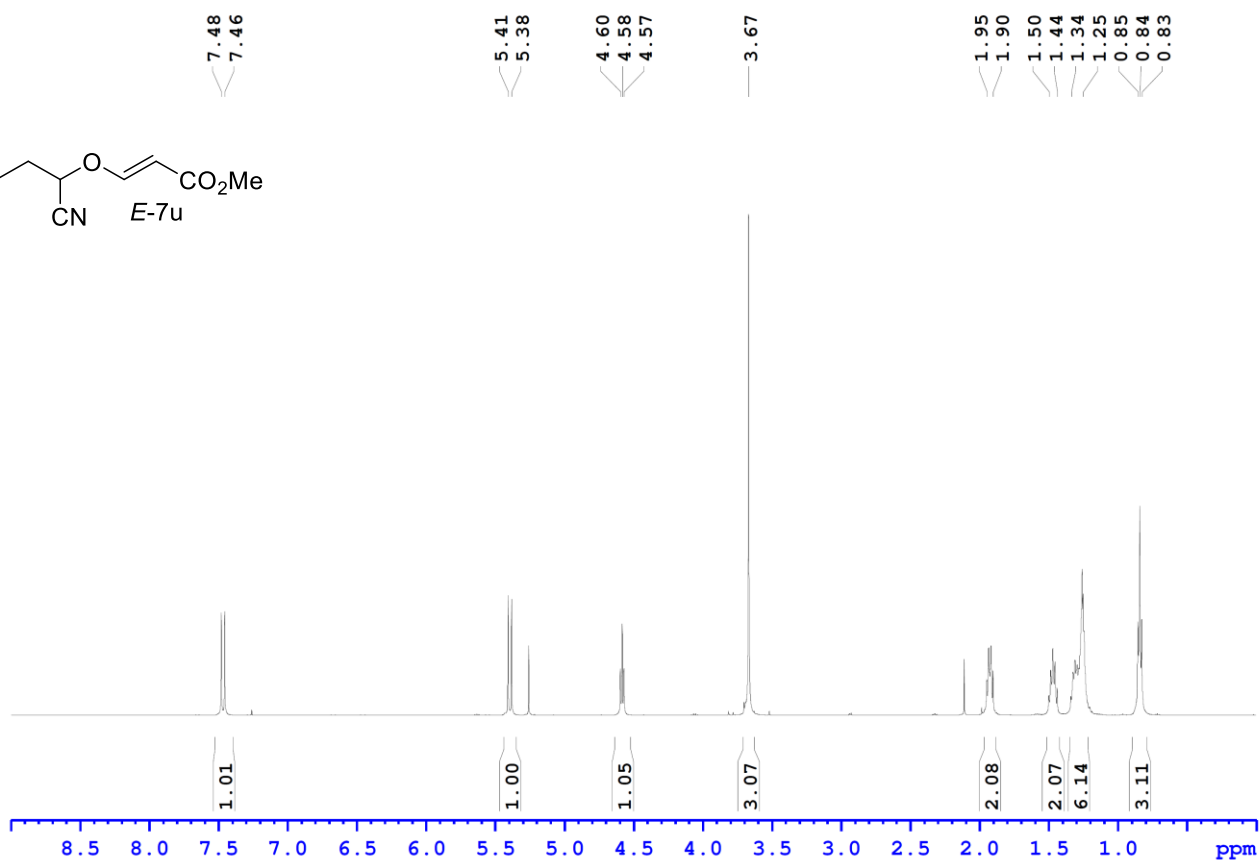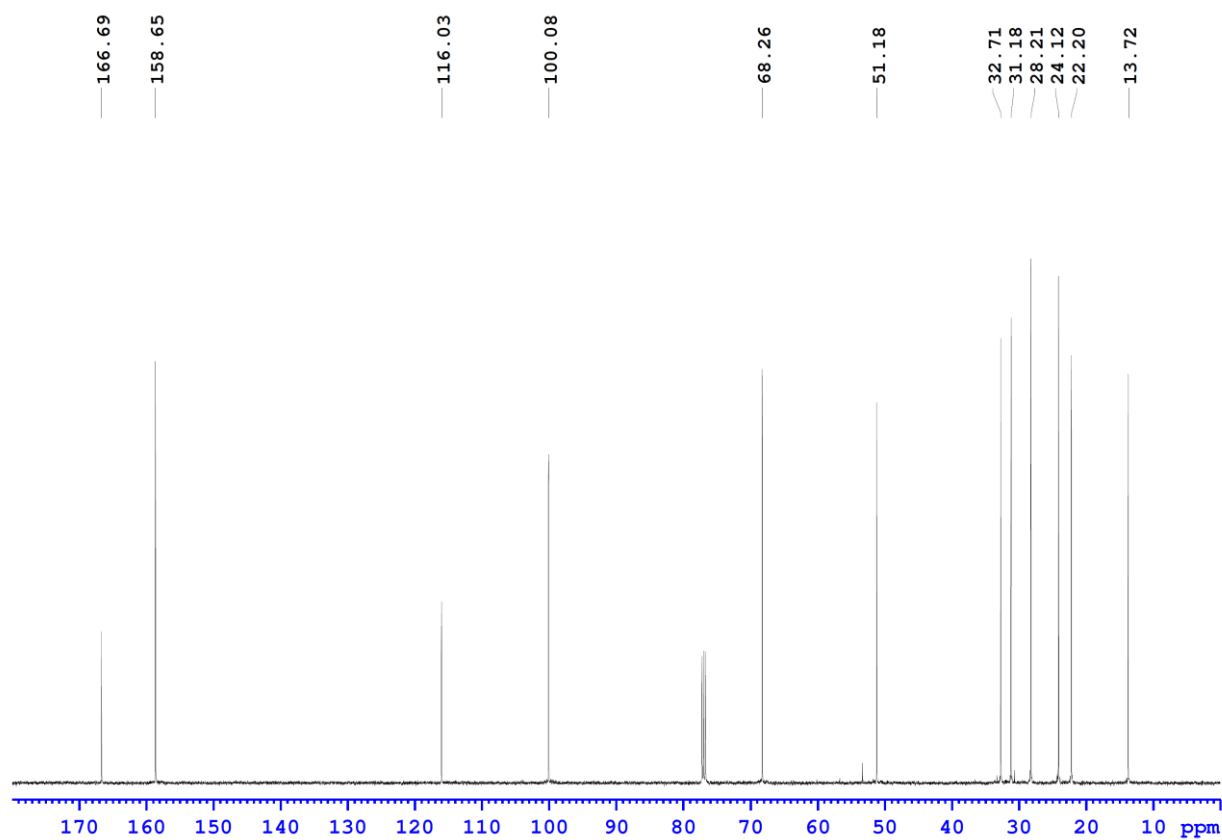

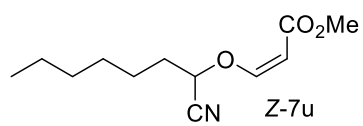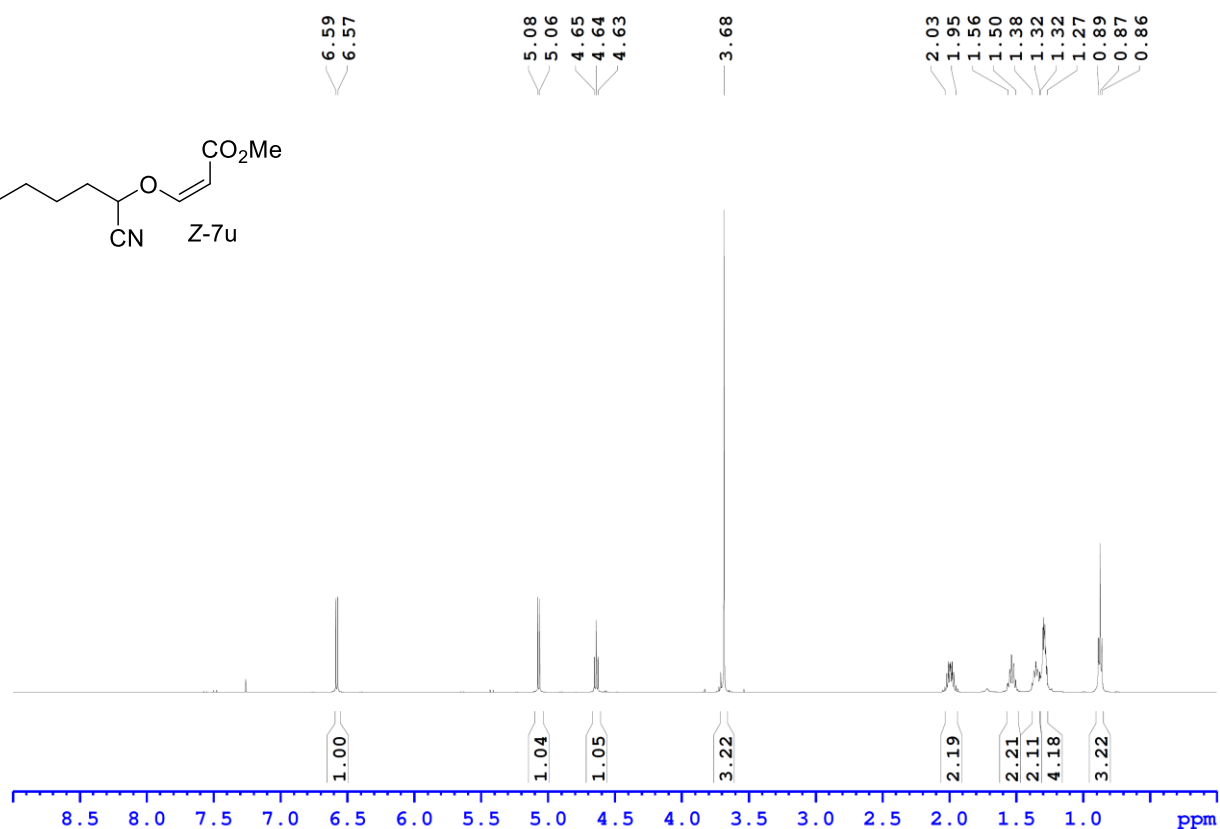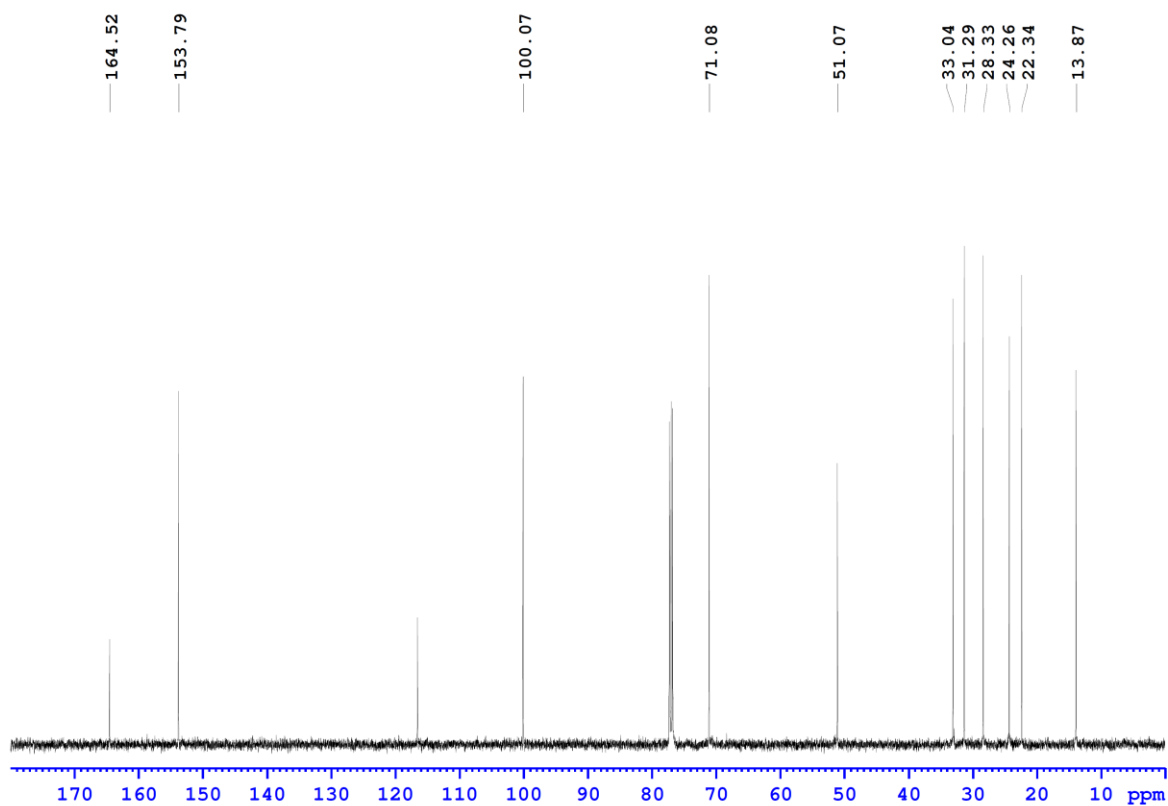

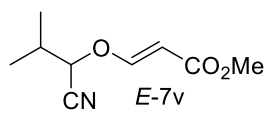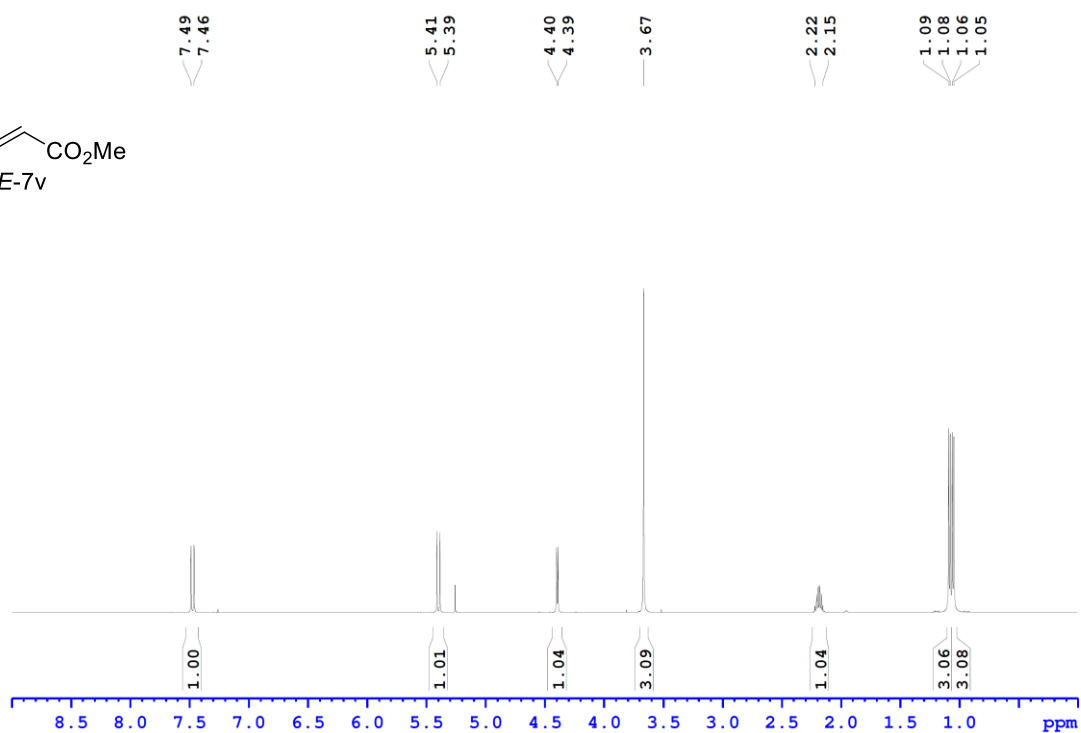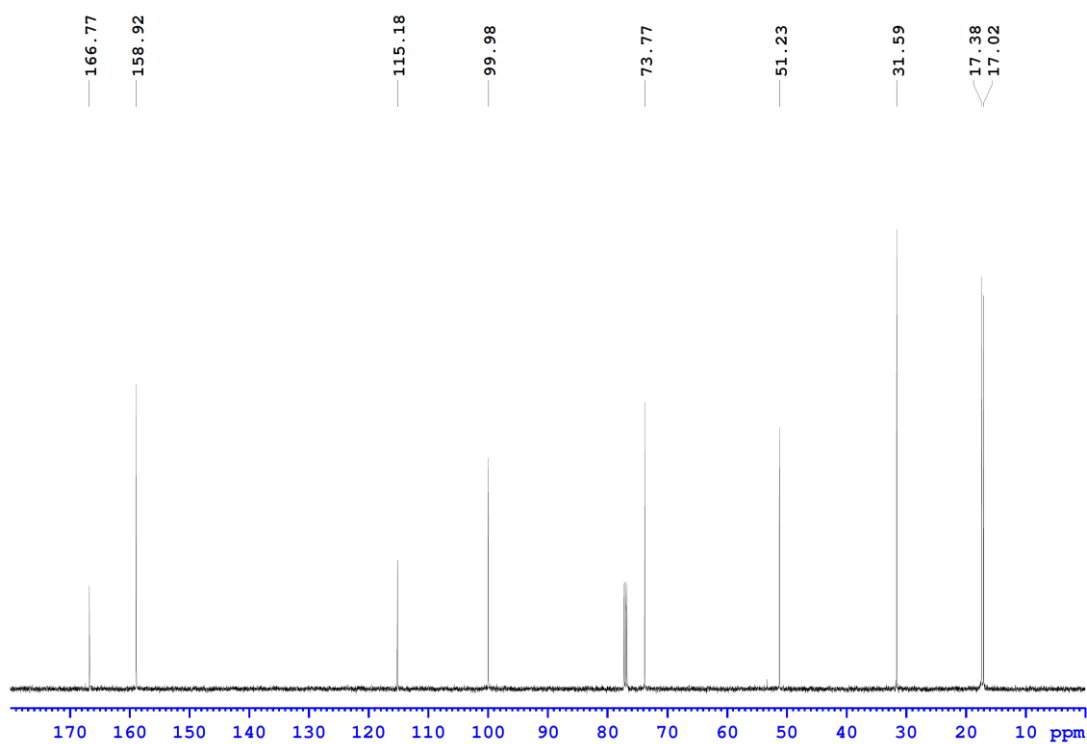

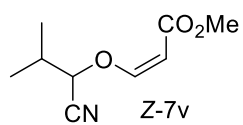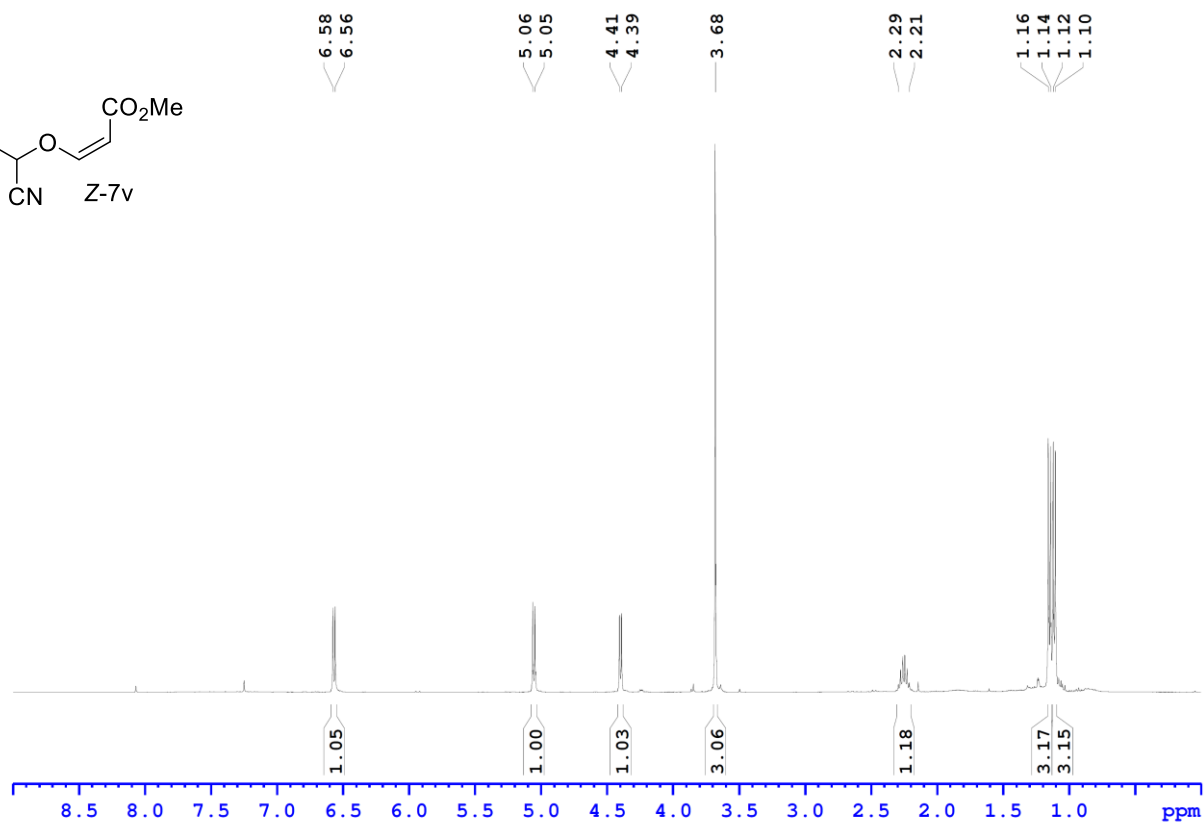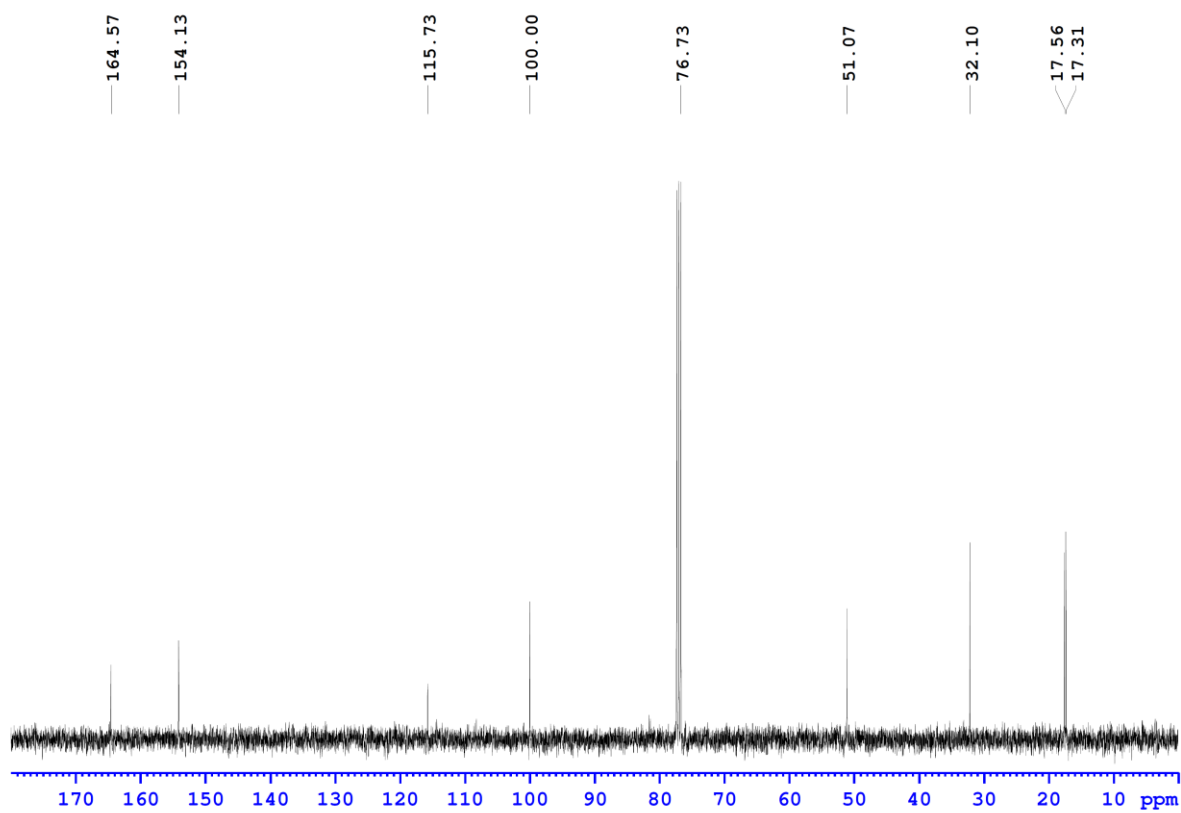

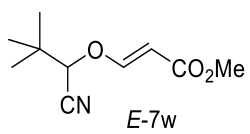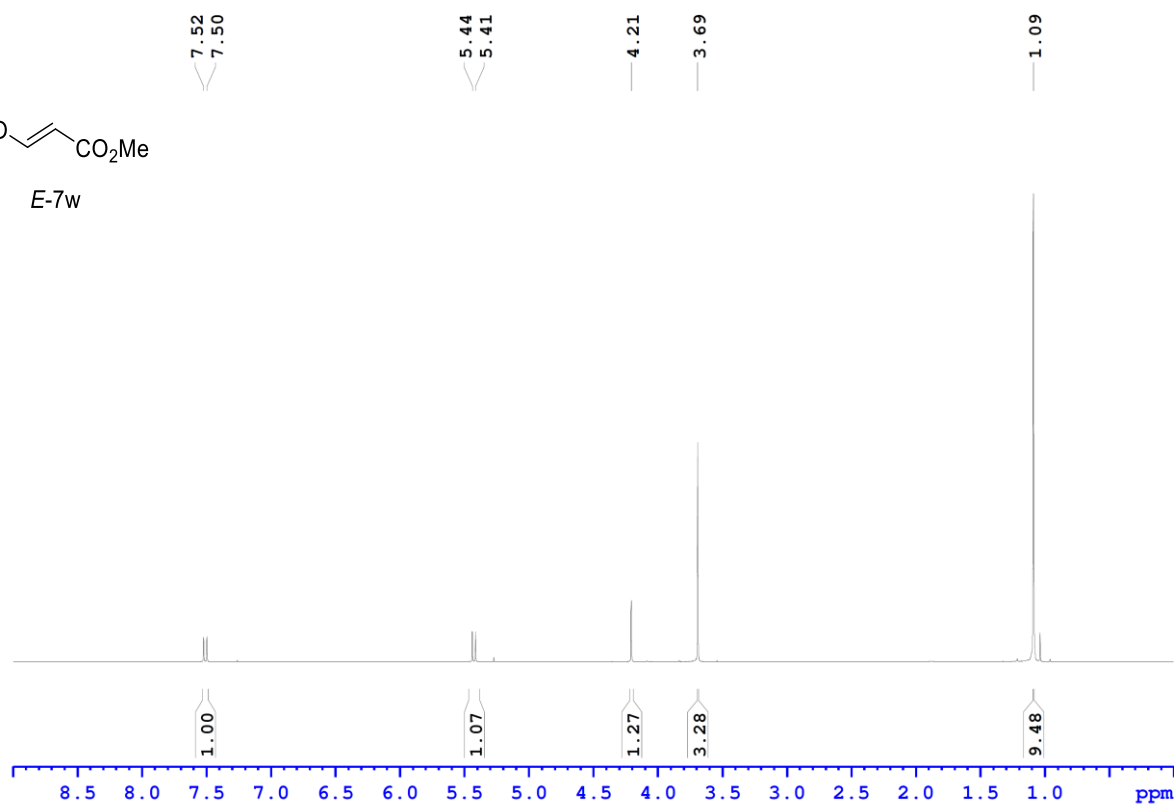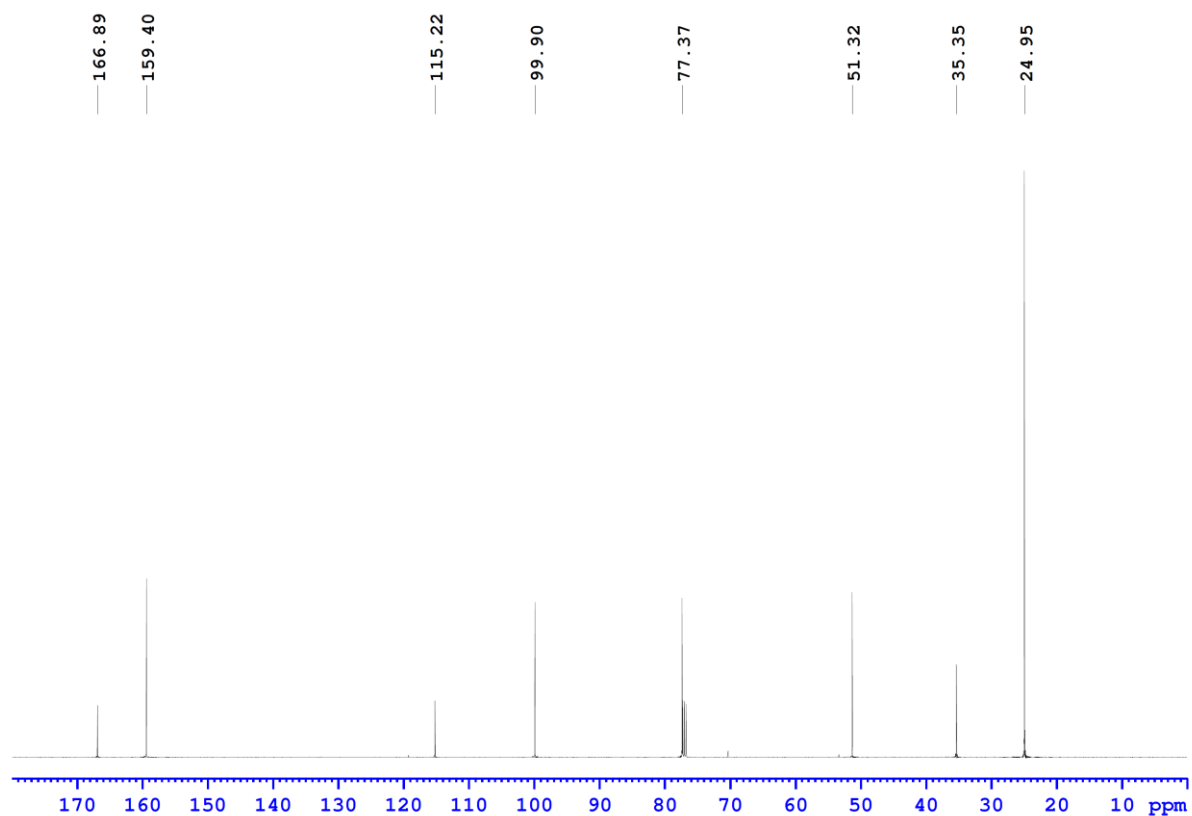

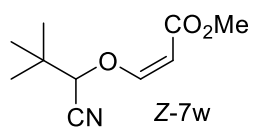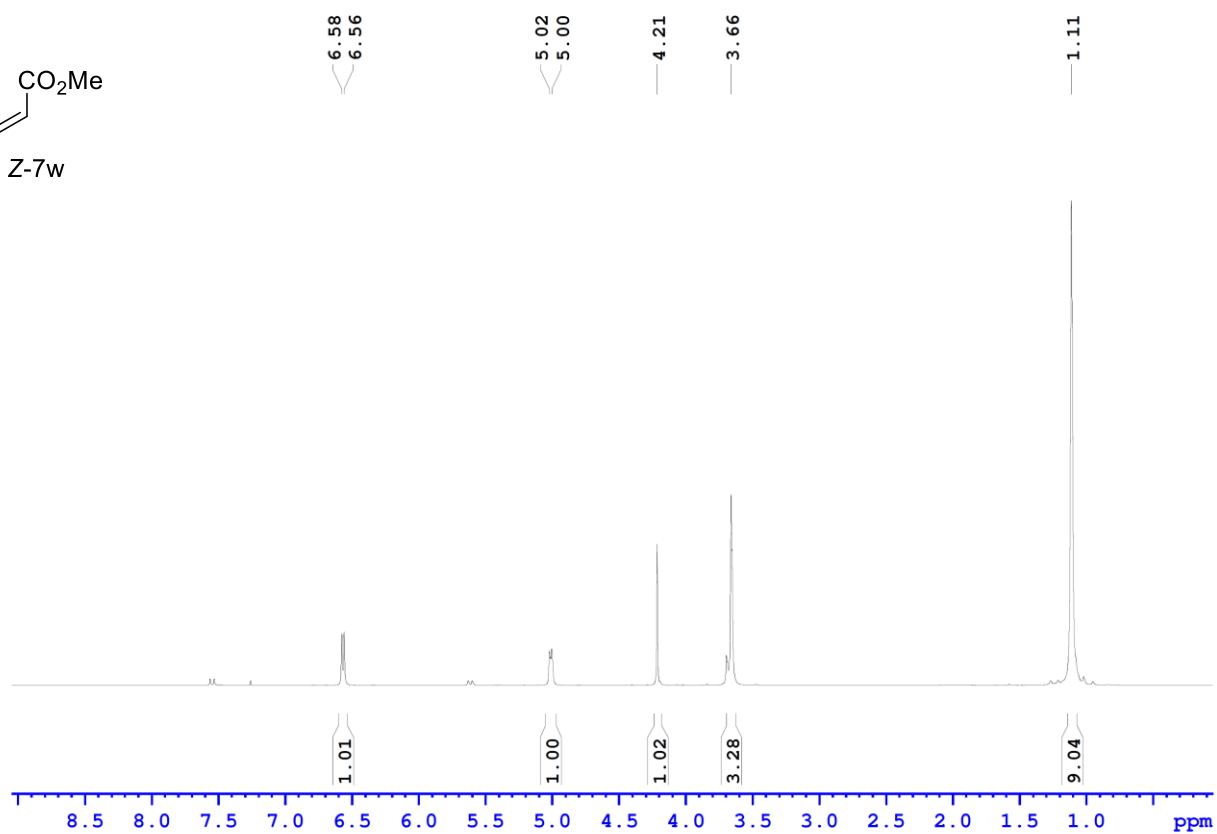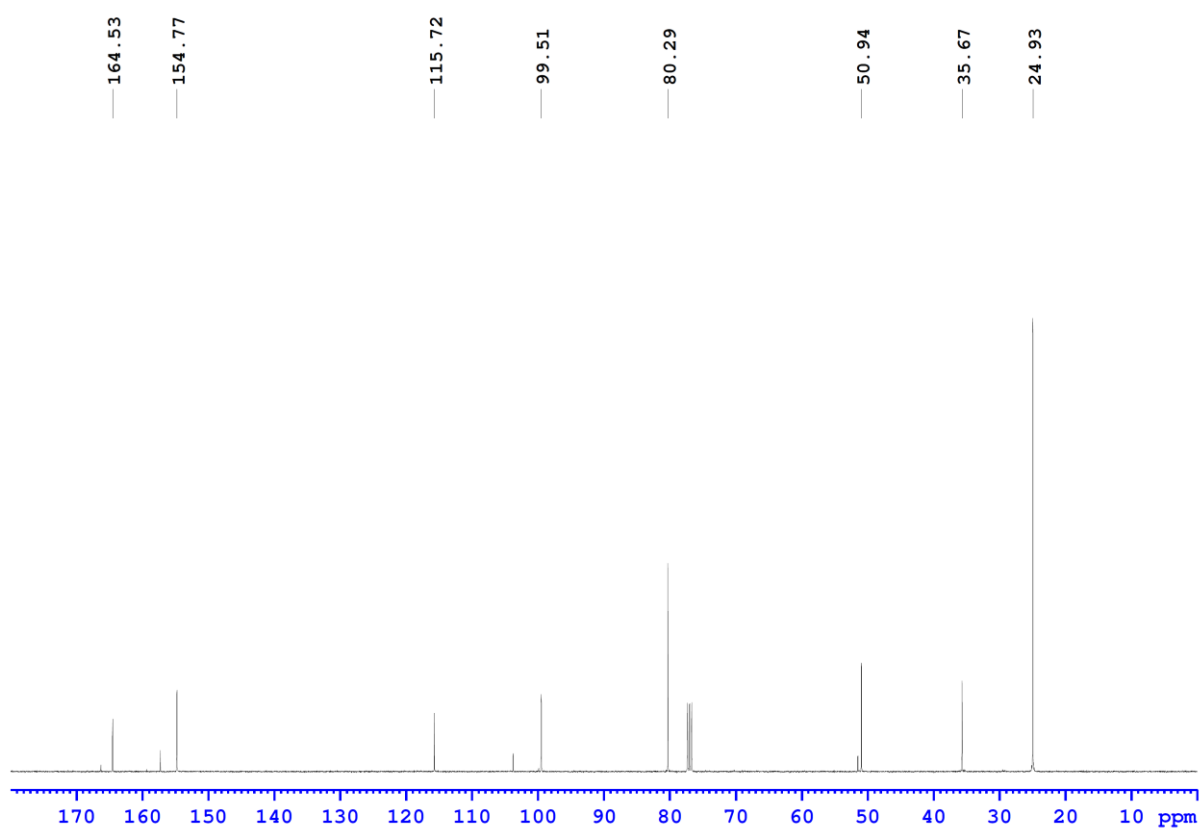

Supplement: s1 [file s1]
